# Supplementary material for: Affected Kindred Analysis of Human X Chromosome Exomes to Identify Novel X-Linked Intellectual Disability Genes
Source: PubMed Central journal article supplement (PMC4332666; doi:10.1371/journal.pone.0116454), 2015-02-13
Supplement: pone.0116454.s001.pdf [file pone.0116454.s001.pdf]

# CMS14284 – CMS15703–K9427

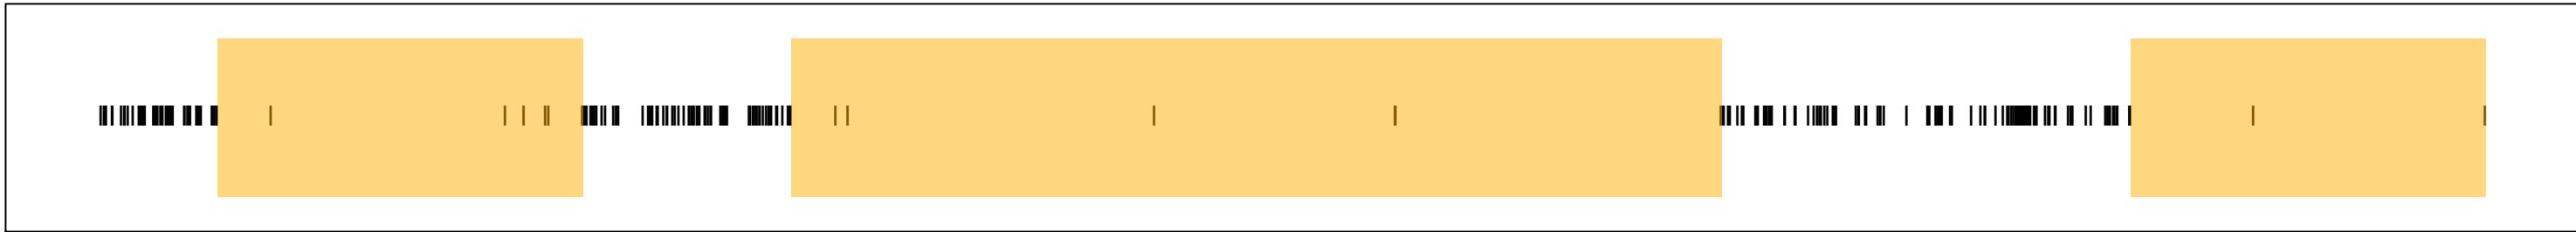

X Chromosome: Pos 1 – 154,899,846

4965 – 4966

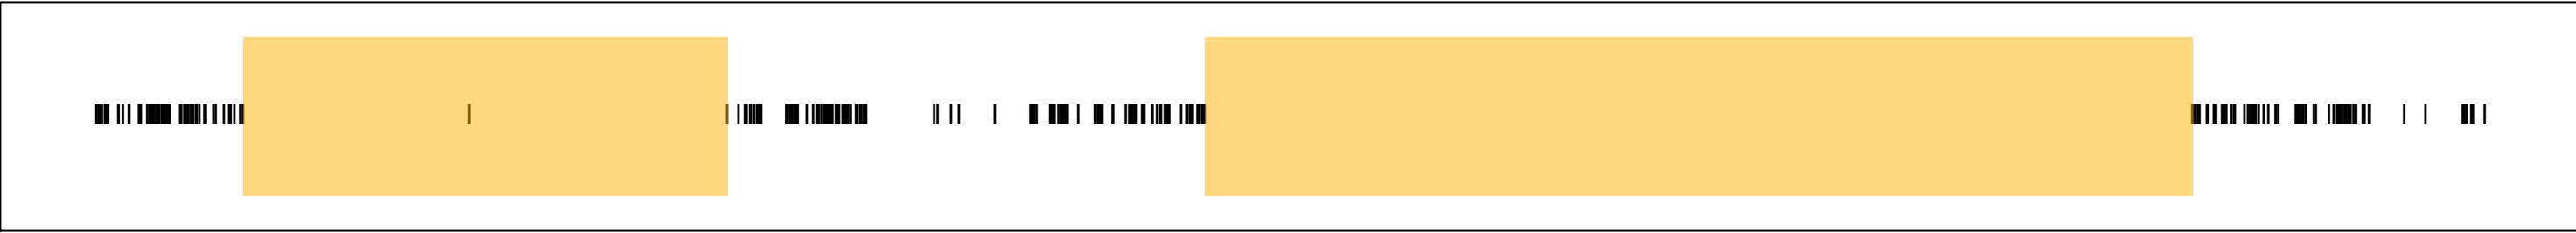

X Chromosome: Pos 1 – 154,899,846

5896 – 5897

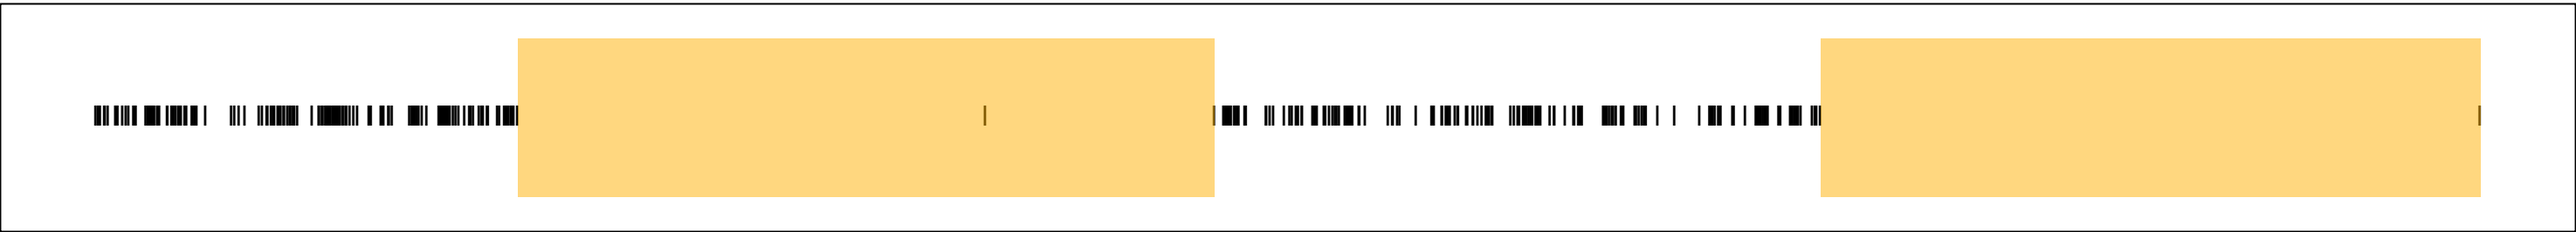

X Chromosome: Pos 1 – 154,899,846

**cms0245 – cms0564**

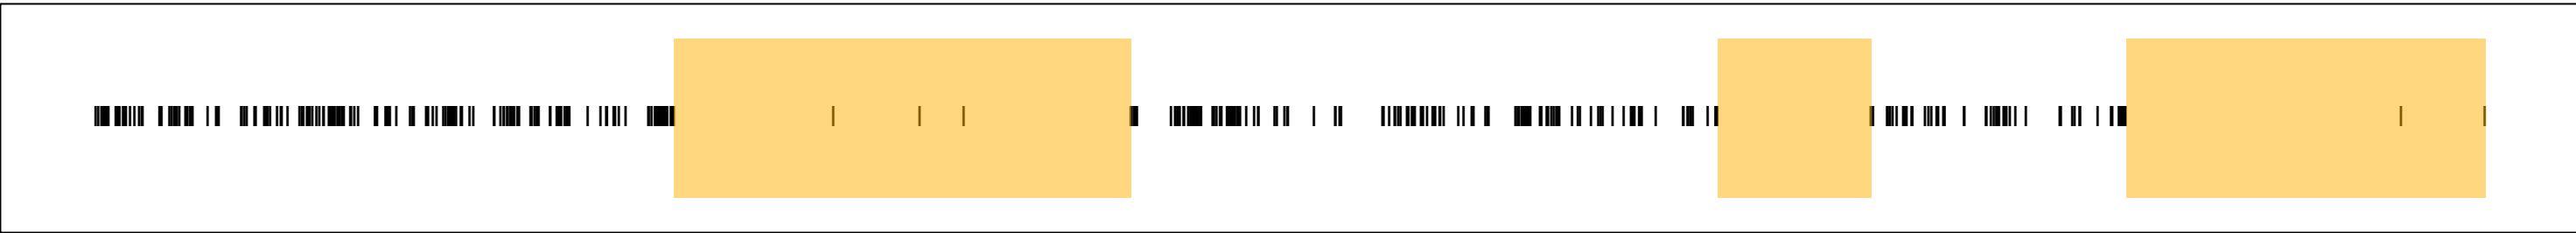

X Chromosome: Pos 1 – 154,899,846

**cms1935 – cms1969**

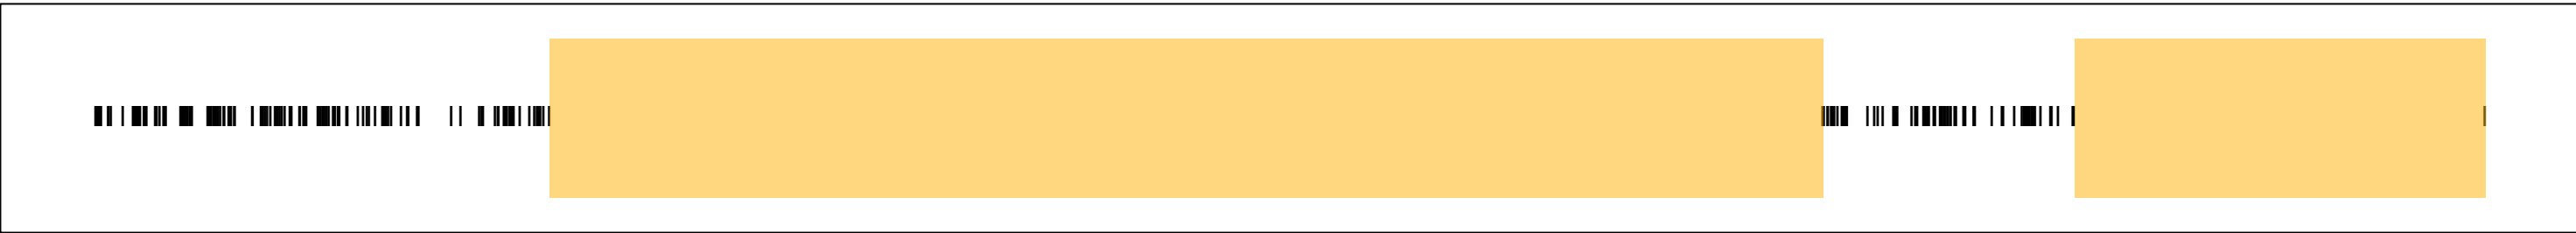

X Chromosome: Pos 1 – 154,899,846

**cms3181 – cms3183**

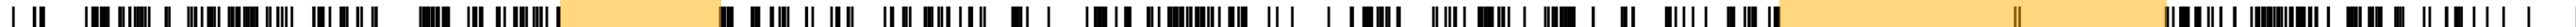

X Chromosome: Pos 1 – 154,899,846

**cms4418 – cms4419**

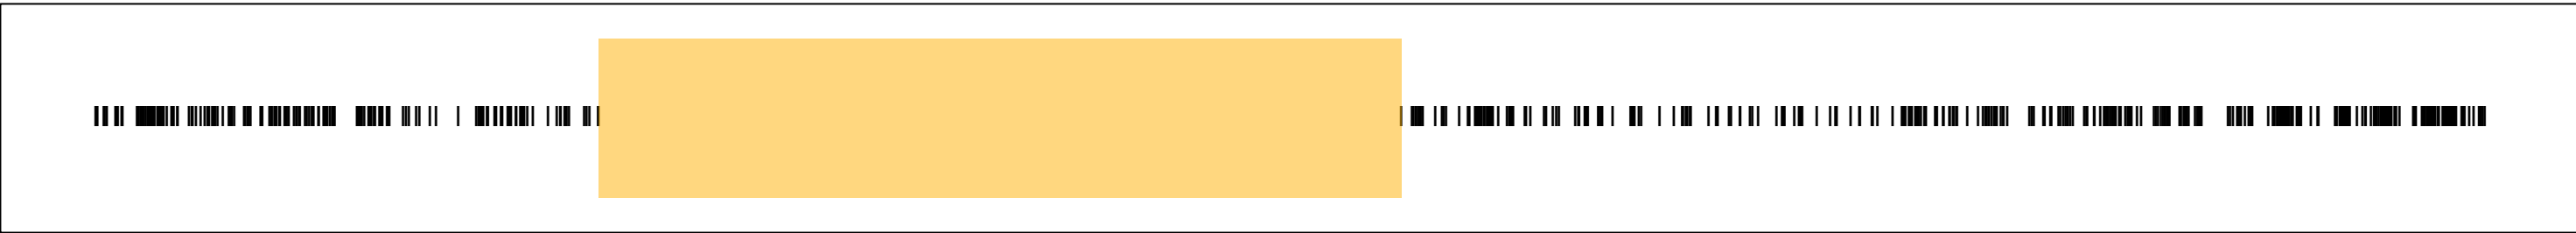

X Chromosome: Pos 1 – 154,899,846

**cms3750 – cms5079**

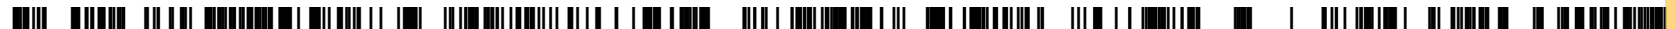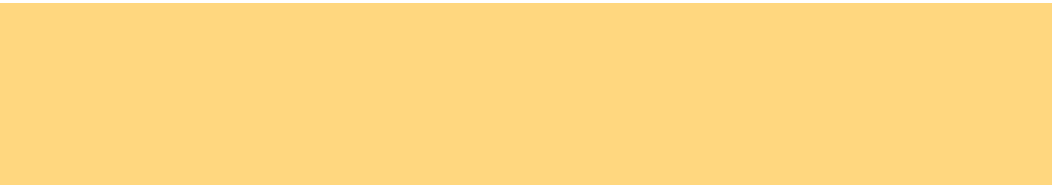

X Chromosome: Pos 1 – 154,899,846



**2539-ZAL - 2540-SAL**

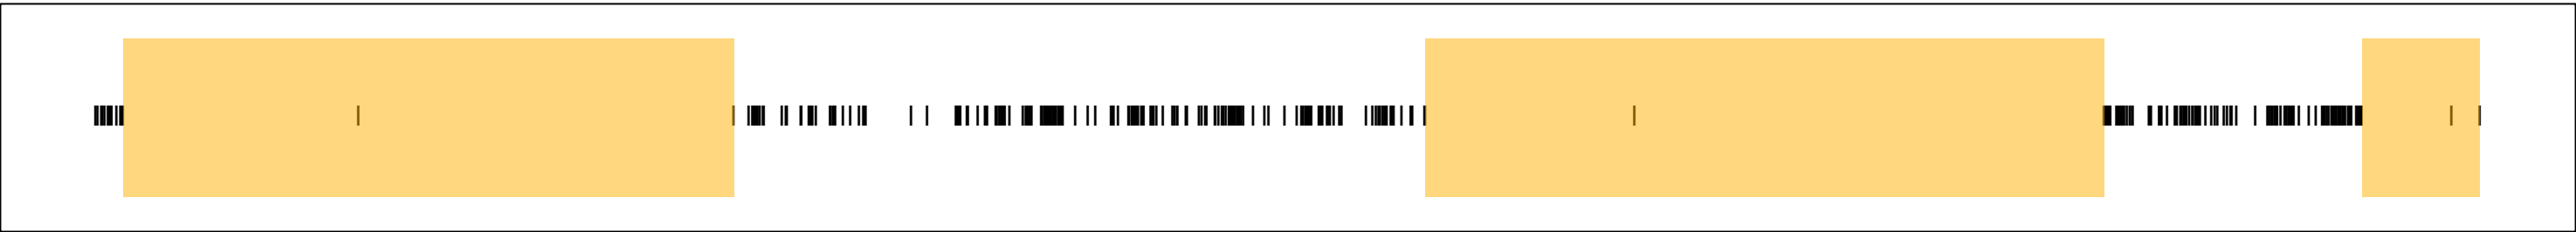

X Chromosome: Pos 1 - 154,899,846

# Griffin-J – Griffin-R

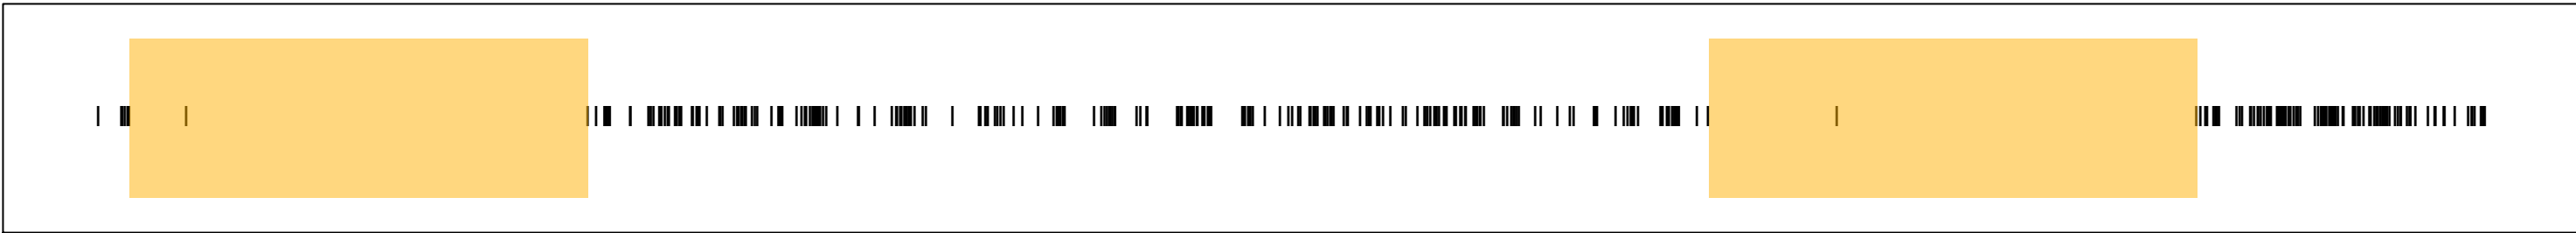

X Chromosome: Pos 1 – 154,899,846

**cms9228 – cms9483**

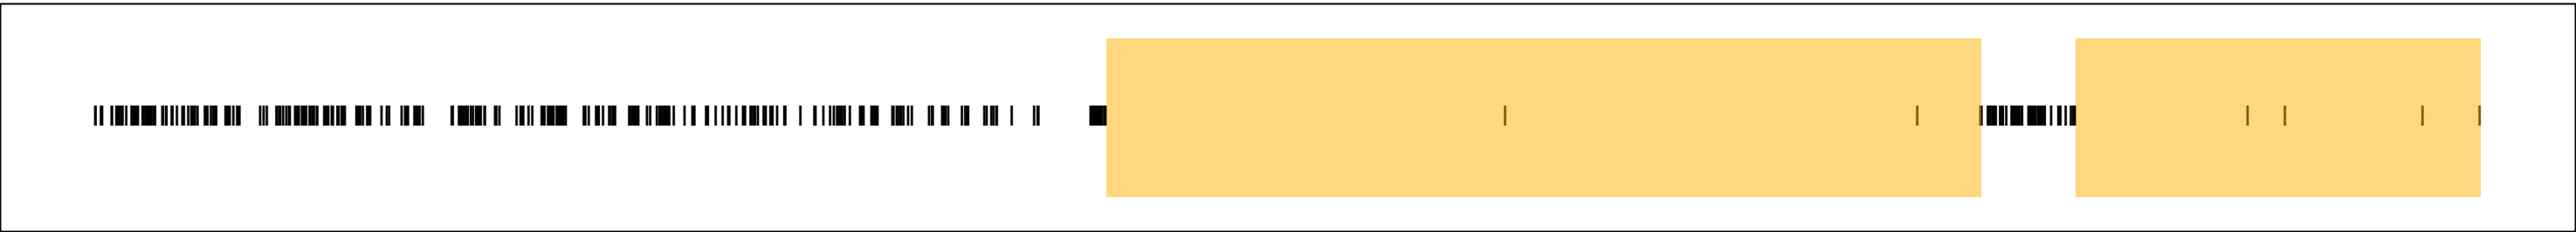

X Chromosome: Pos 1 – 154,899,846

**cms11961 – cms11962**

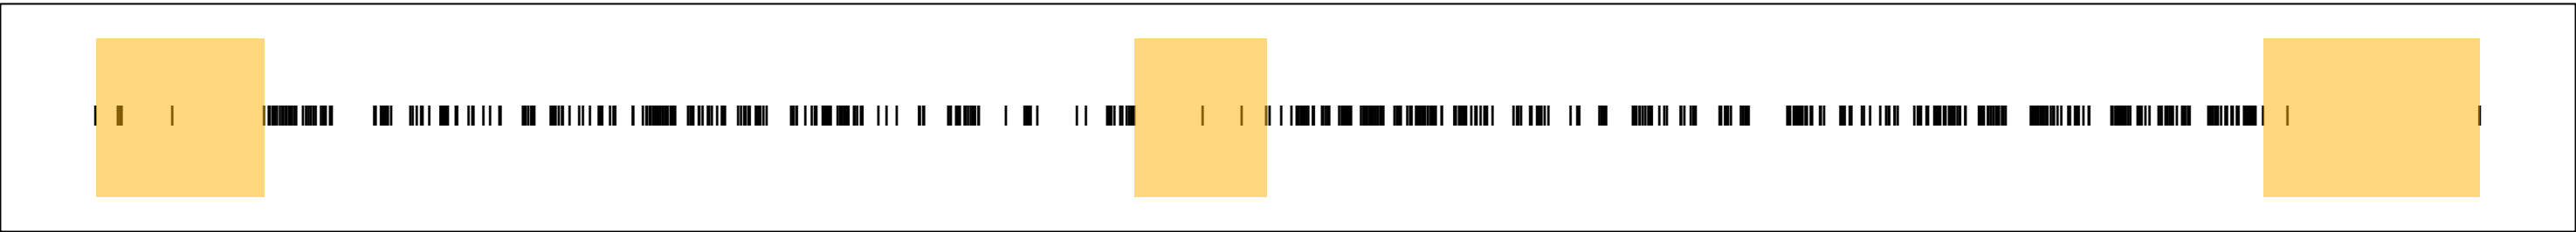

X Chromosome: Pos 1 – 154,899,846

**cms13173 – cms13174**

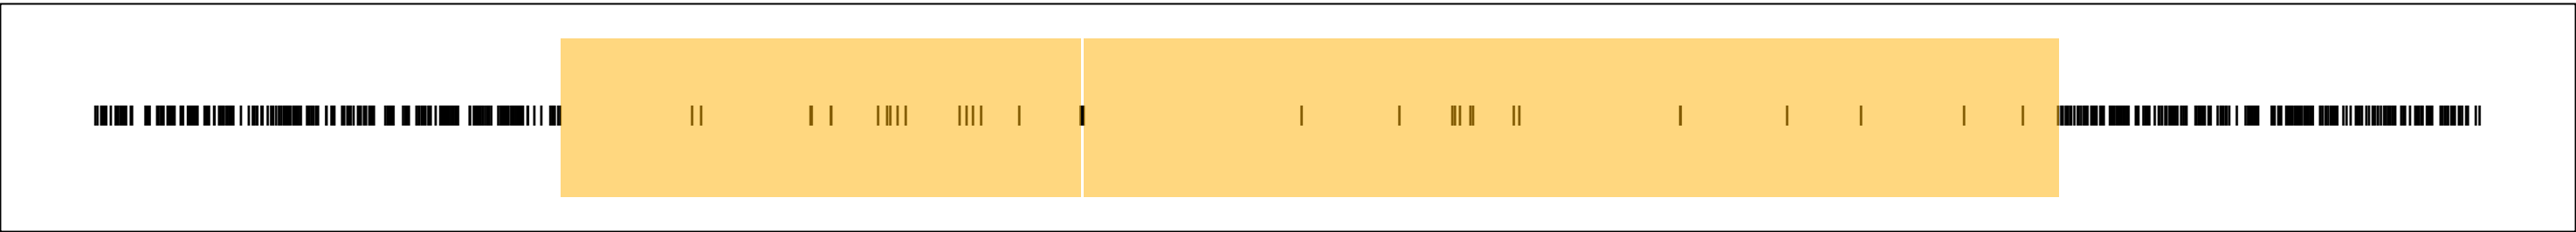

X Chromosome: Pos 1 – 154,899,846

**cms13303 – cms13979**

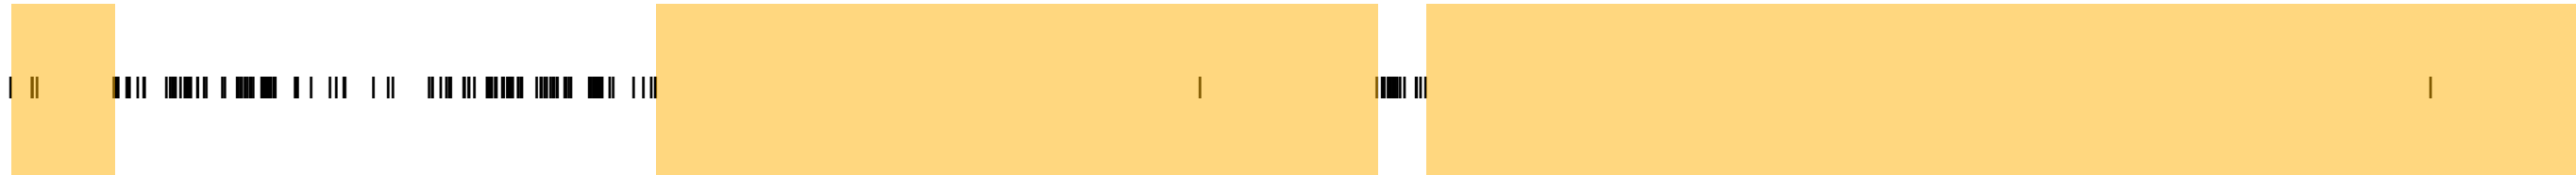

X Chromosome: Pos 1 – 154,899,846

**cms17118 – cms18212**

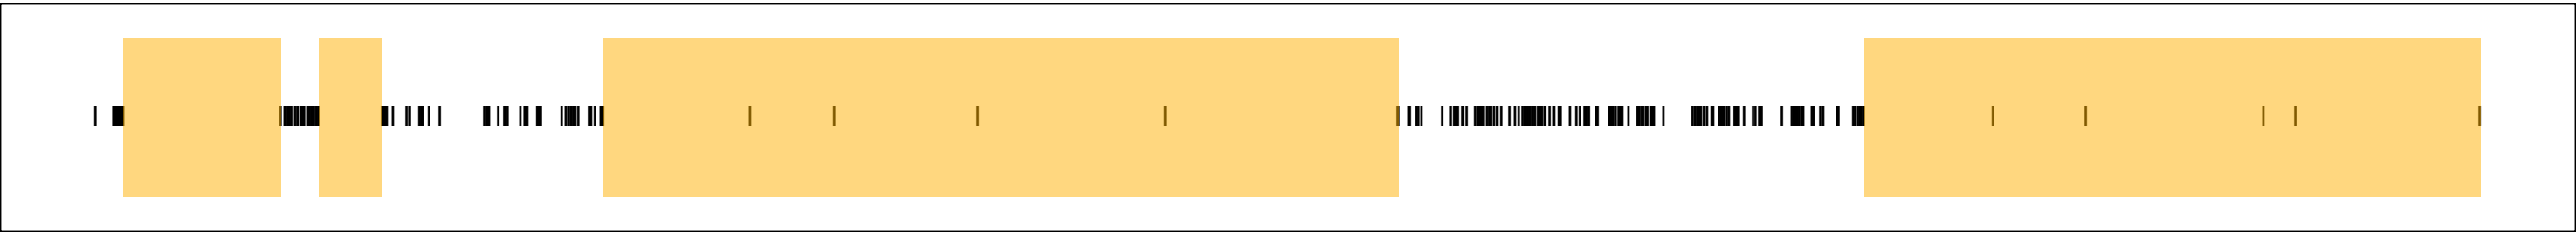

X Chromosome: Pos 1 – 154,899,846

# CMS19847 – CMS19849

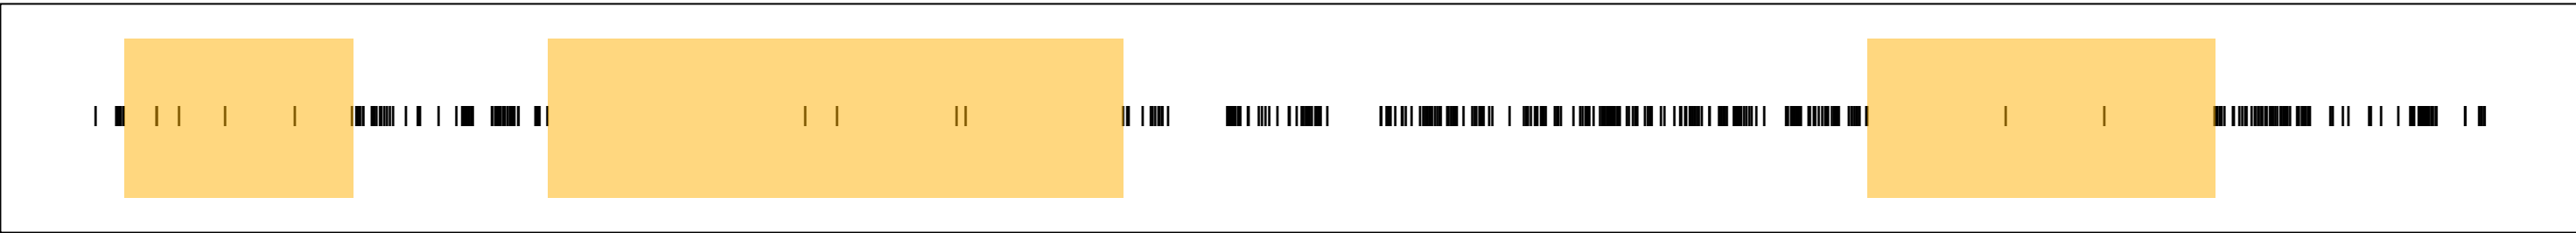

X Chromosome: Pos 1 – 154,899,846



**cms22744 – cms22745**

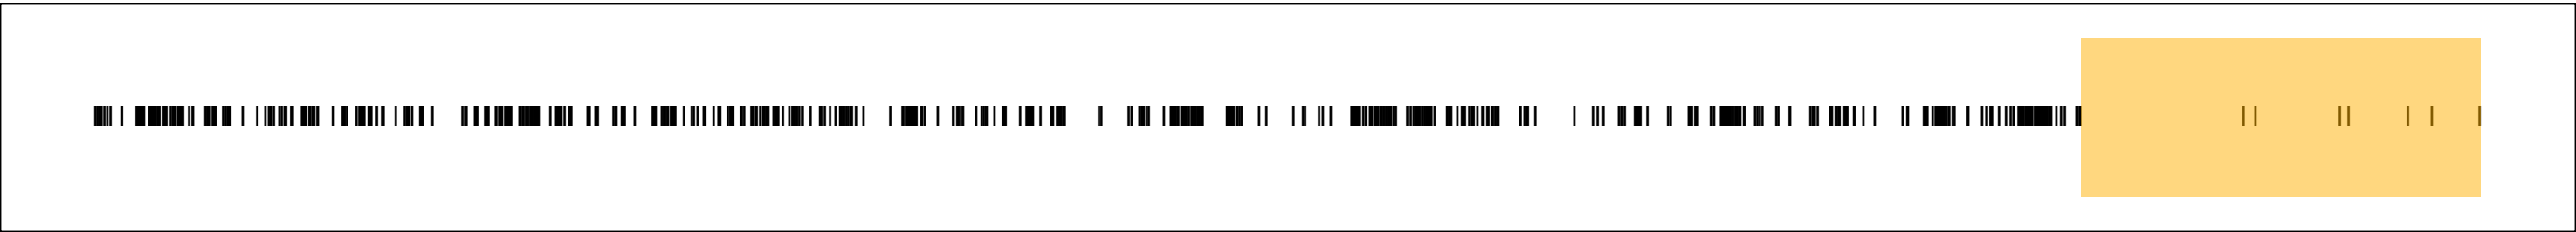

X Chromosome: Pos 1 – 154,899,846

**cms13265 – cms13267**

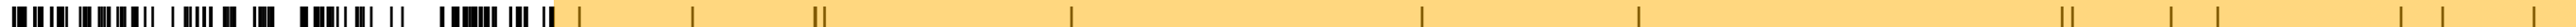

X Chromosome: Pos 1 – 154,899,846

**13439 – cms1861**

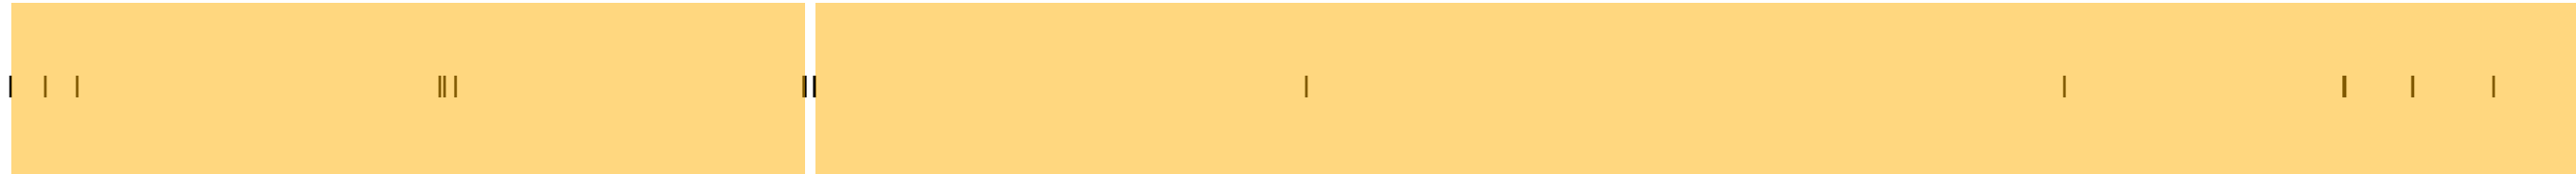

X Chromosome: Pos 1 – 154,899,846

# cms2026 – cms2027

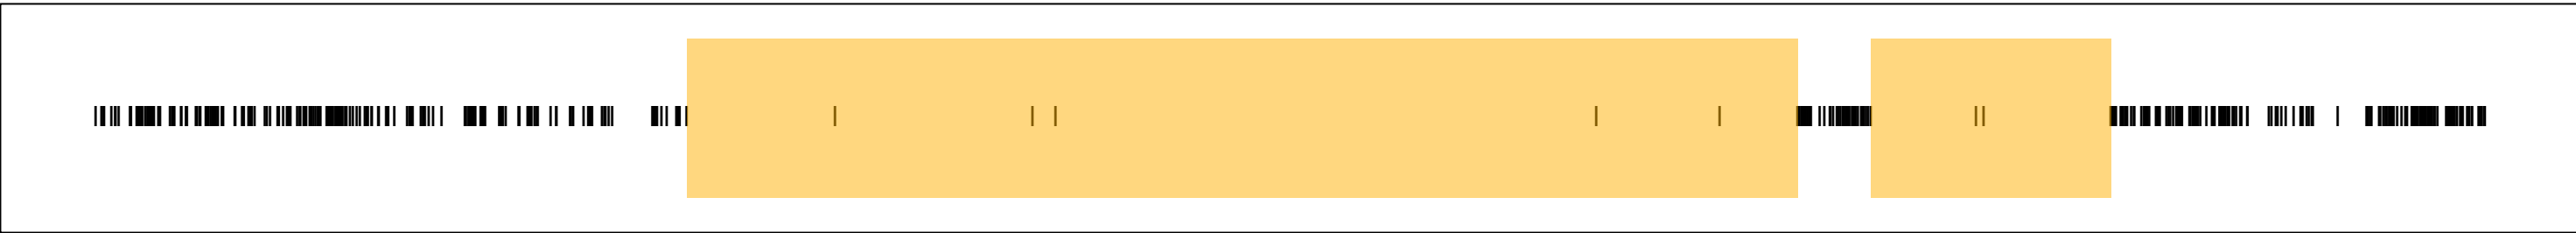

X Chromosome: Pos 1 – 154,899,846

**cms9672 – cms9673**

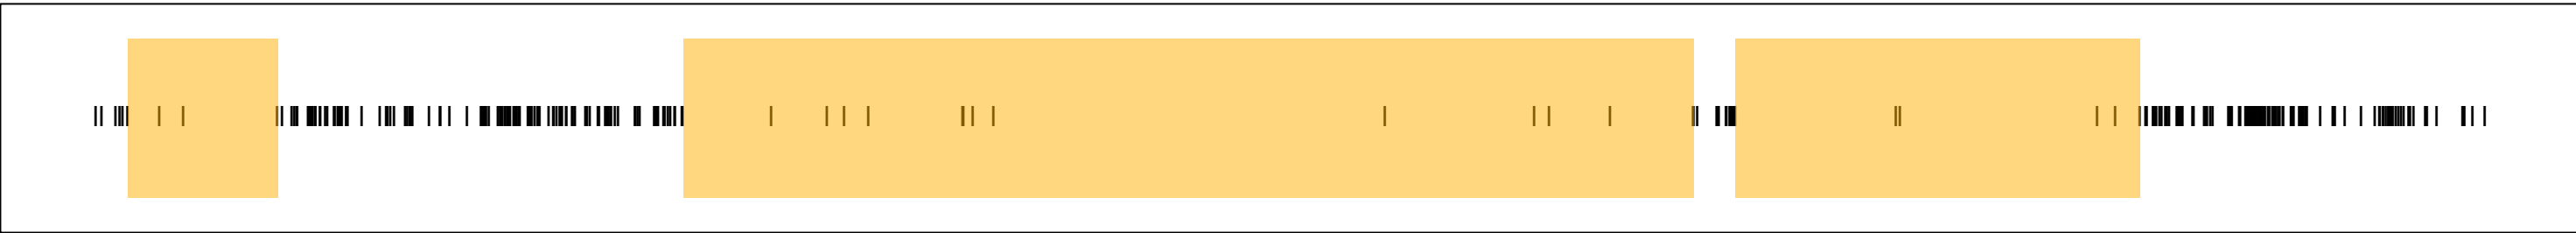

X Chromosome: Pos 1 – 154,899,846

**cms20461 – cms20462**

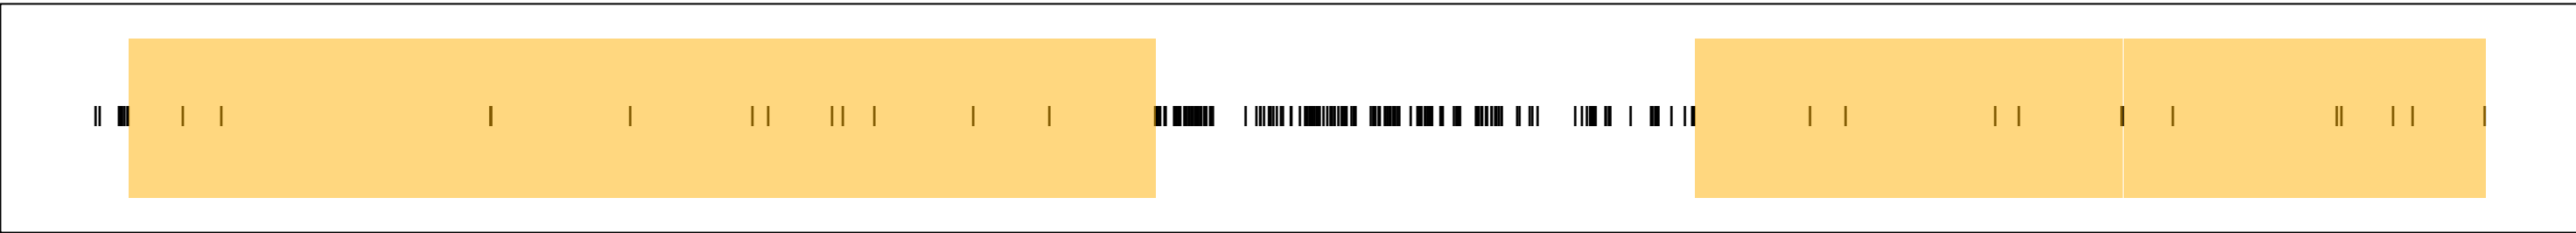

X Chromosome: Pos 1 – 154,899,846

**cms18655 – cms18656**

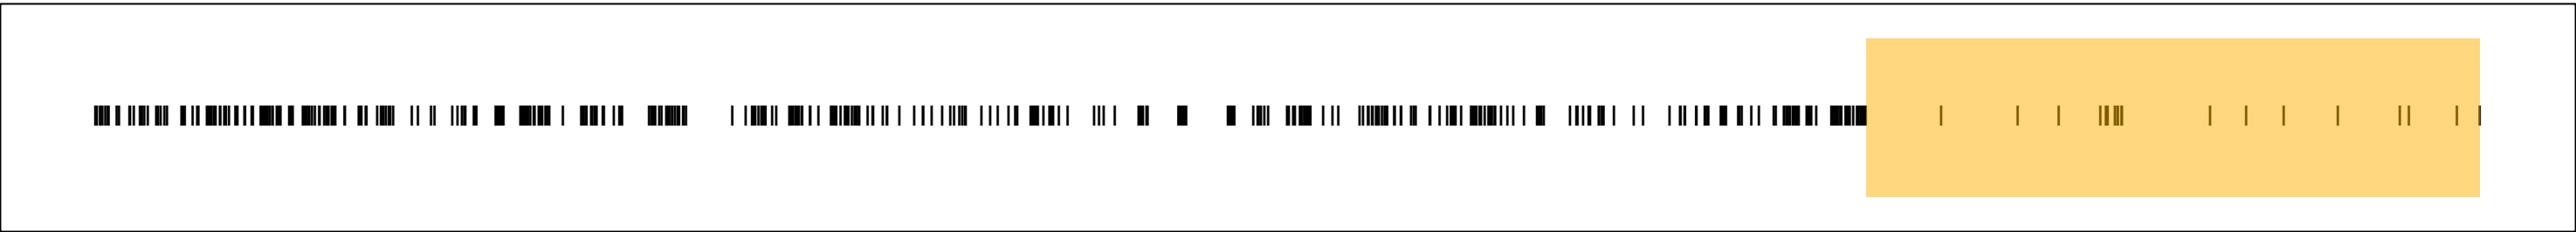

X Chromosome: Pos 1 – 154,899,846

# CMS20461 – CMS20462

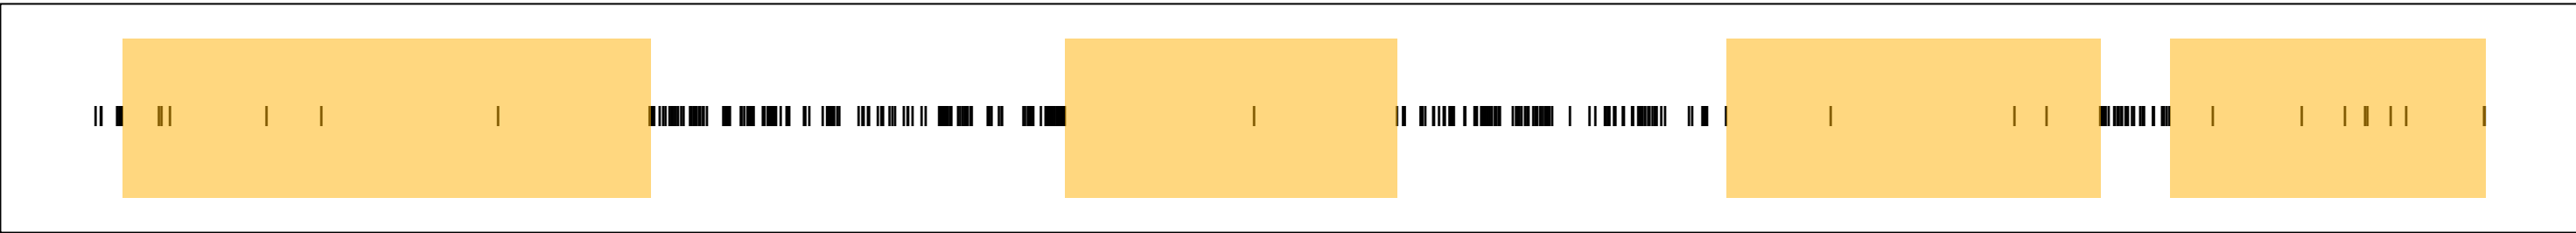

X Chromosome: Pos 1 – 154,899,846



# cms0559a – cms19029

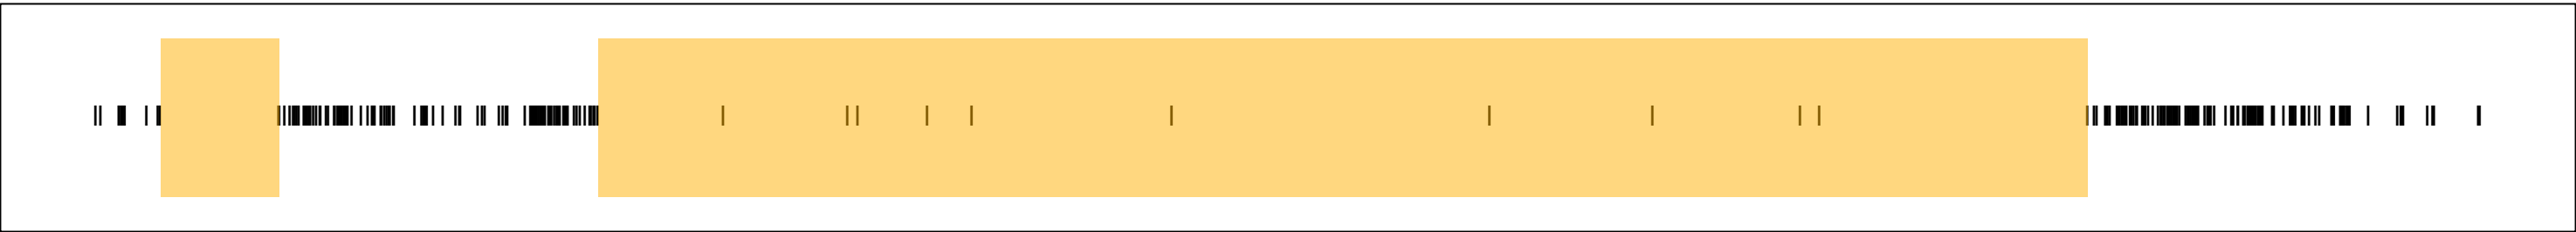

X Chromosome: Pos 1 – 154,899,846

**cms0975 – cms19028**

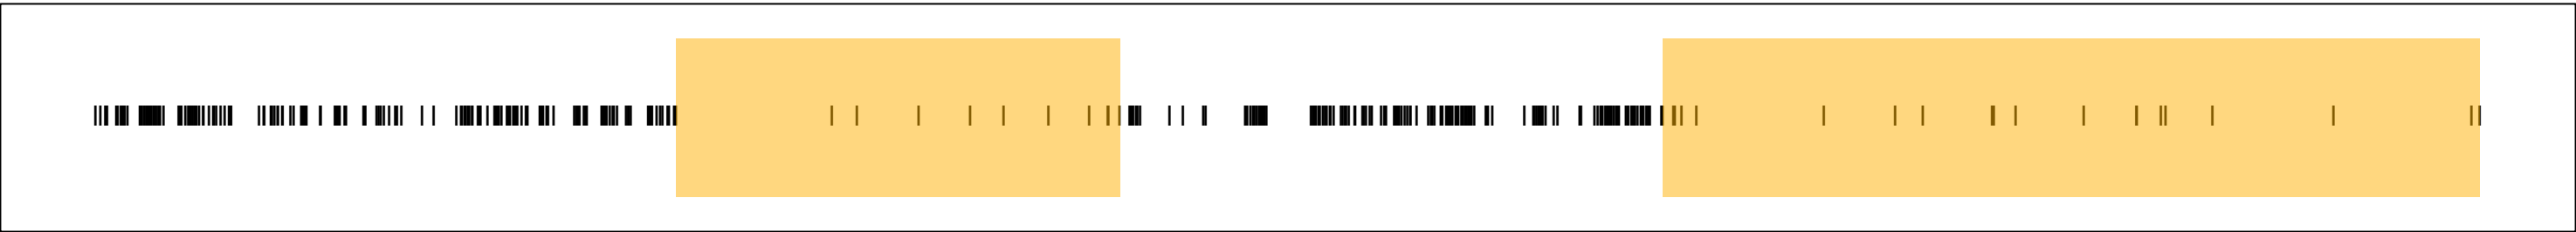

X Chromosome: Pos 1 – 154,899,846
