# Supplementary material for: Affected Kindred Analysis of Human X Chromosome Exomes to Identify Novel X-Linked Intellectual Disability Genes
Source: PubMed Central journal article supplement (PMC4332666; doi:10.1371/journal.pone.0116454), 2015-02-13
Supplement: pone.0116454.s002.pdf [file pone.0116454.s002.pdf]

CMS14284 – CMS15703–K9427

DISCORDANT

CONCORDANT ALT

CONCORDANT REF

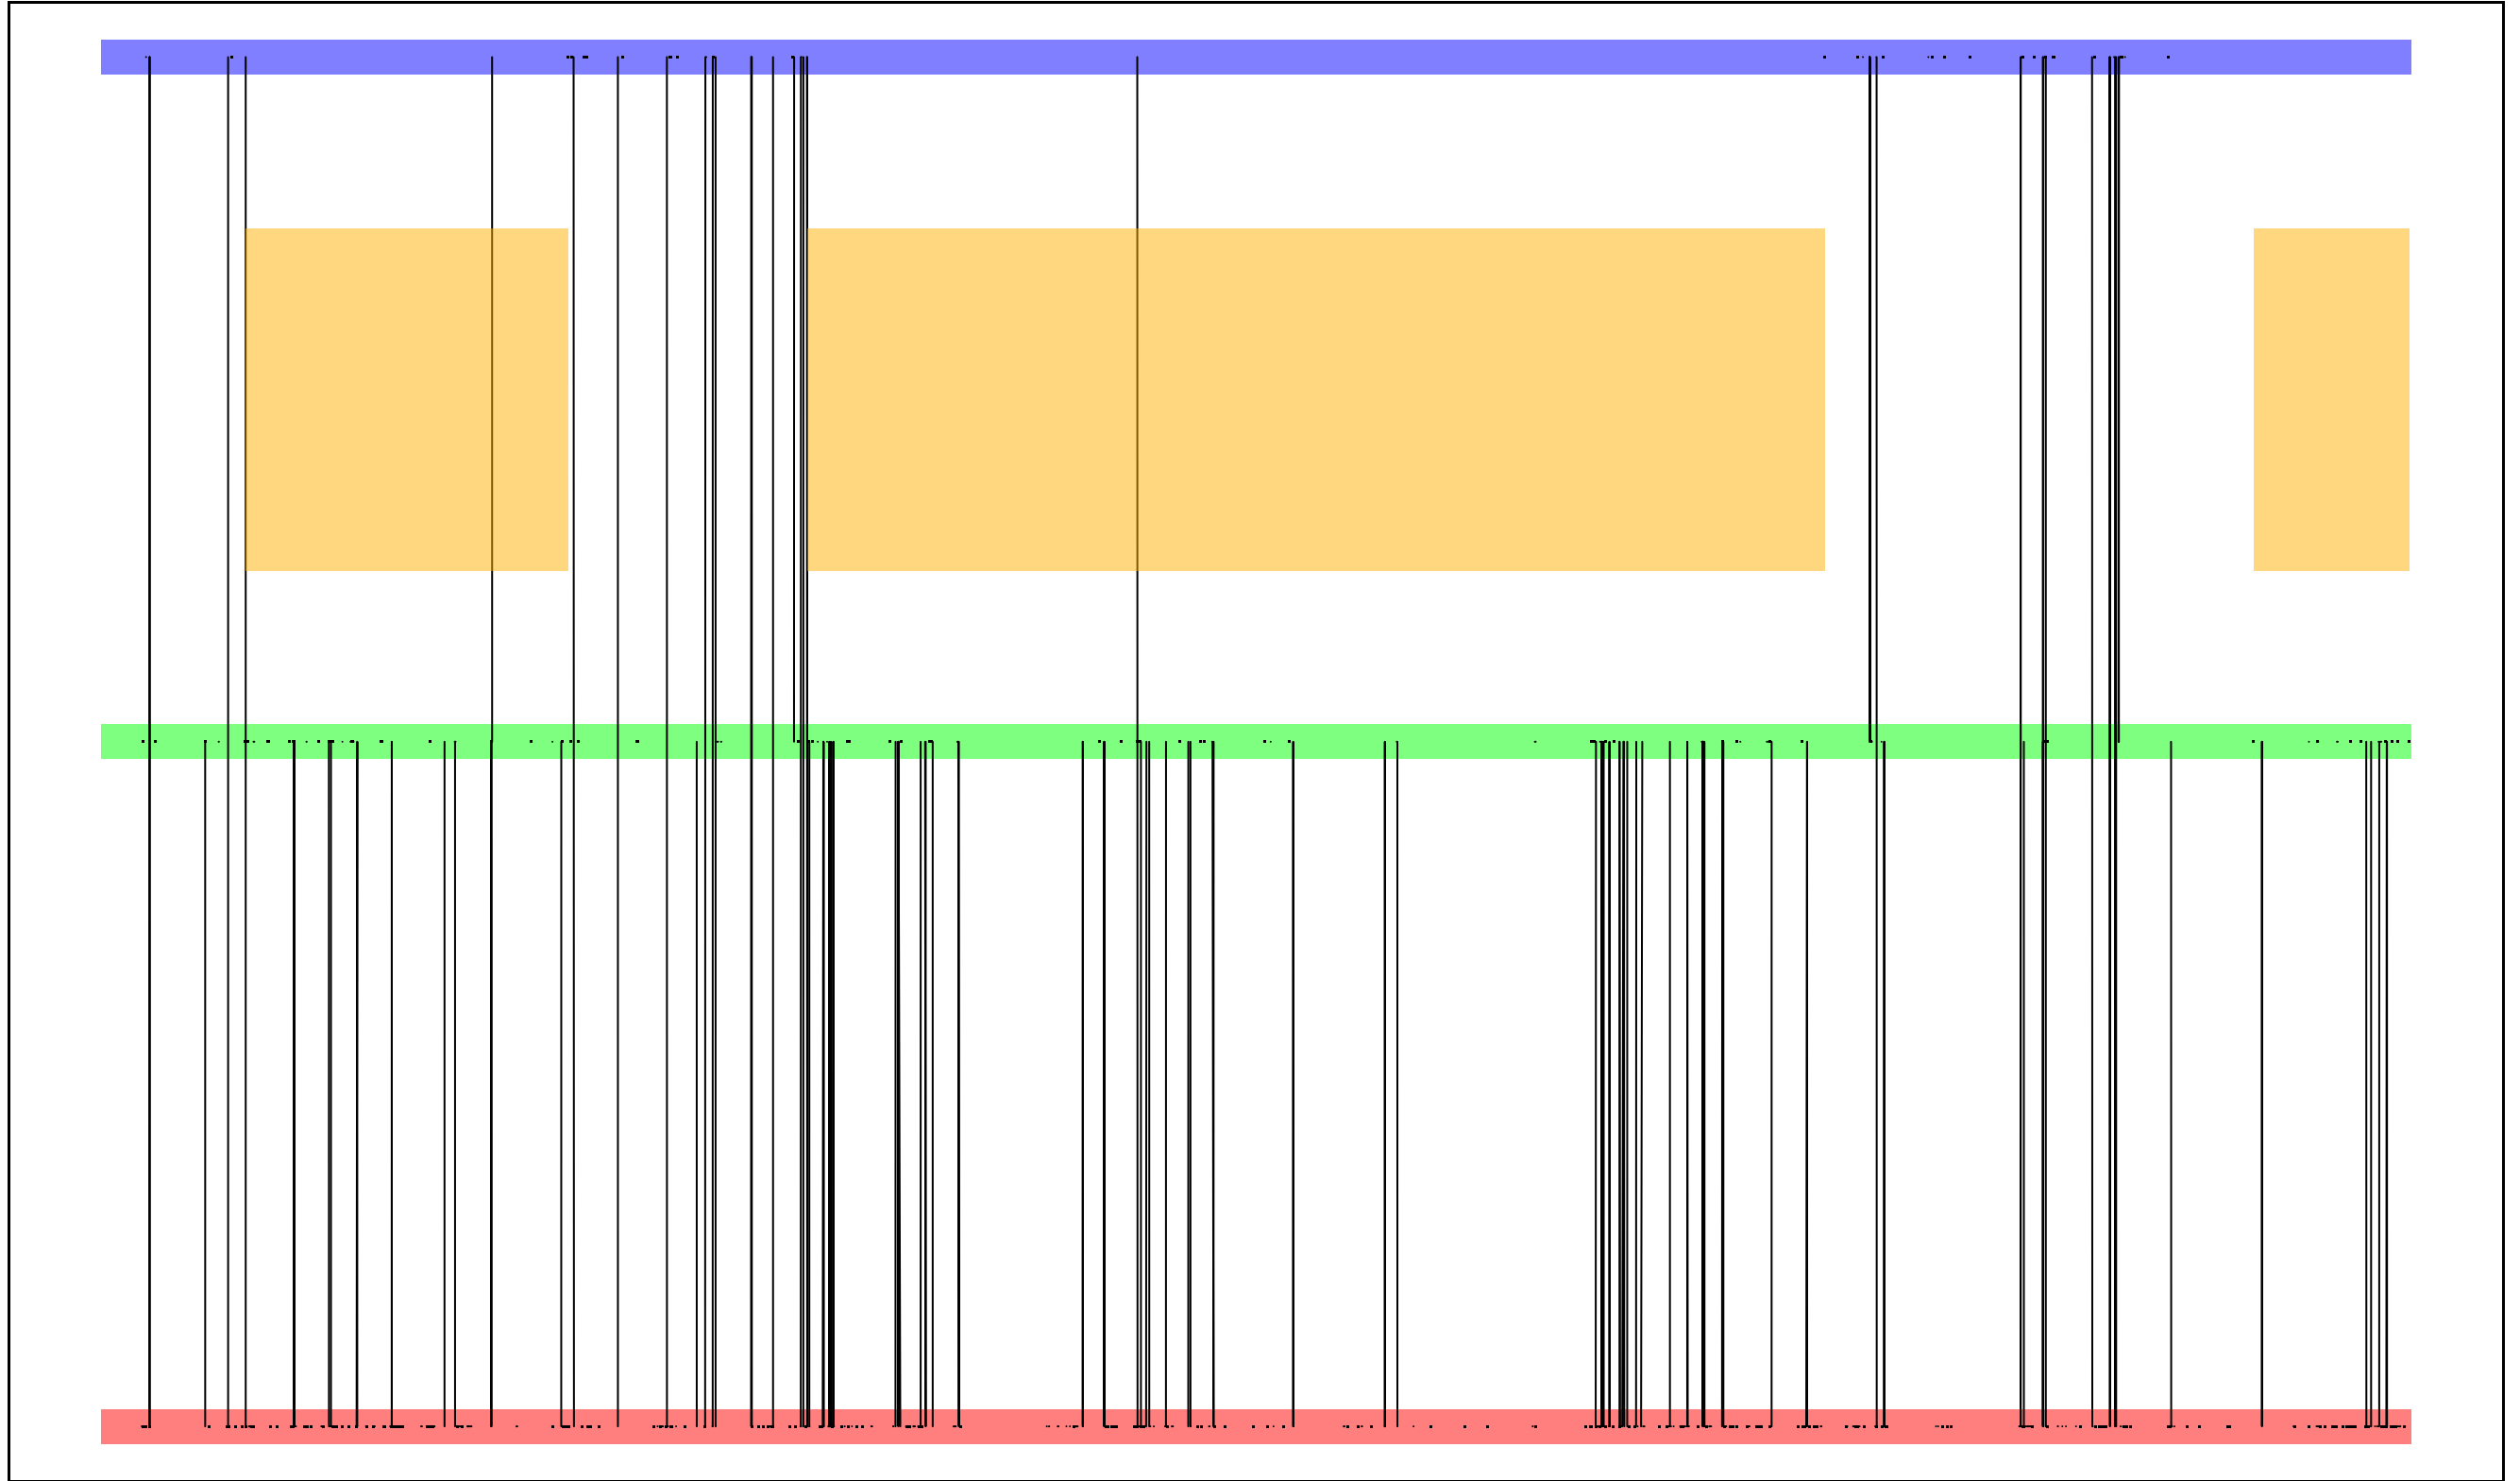

X Chromosome: Pos 1 – 154,899,846

4965 – 4966

DISCORDANT

CONCORDANT ALT

CONCORDANT REF

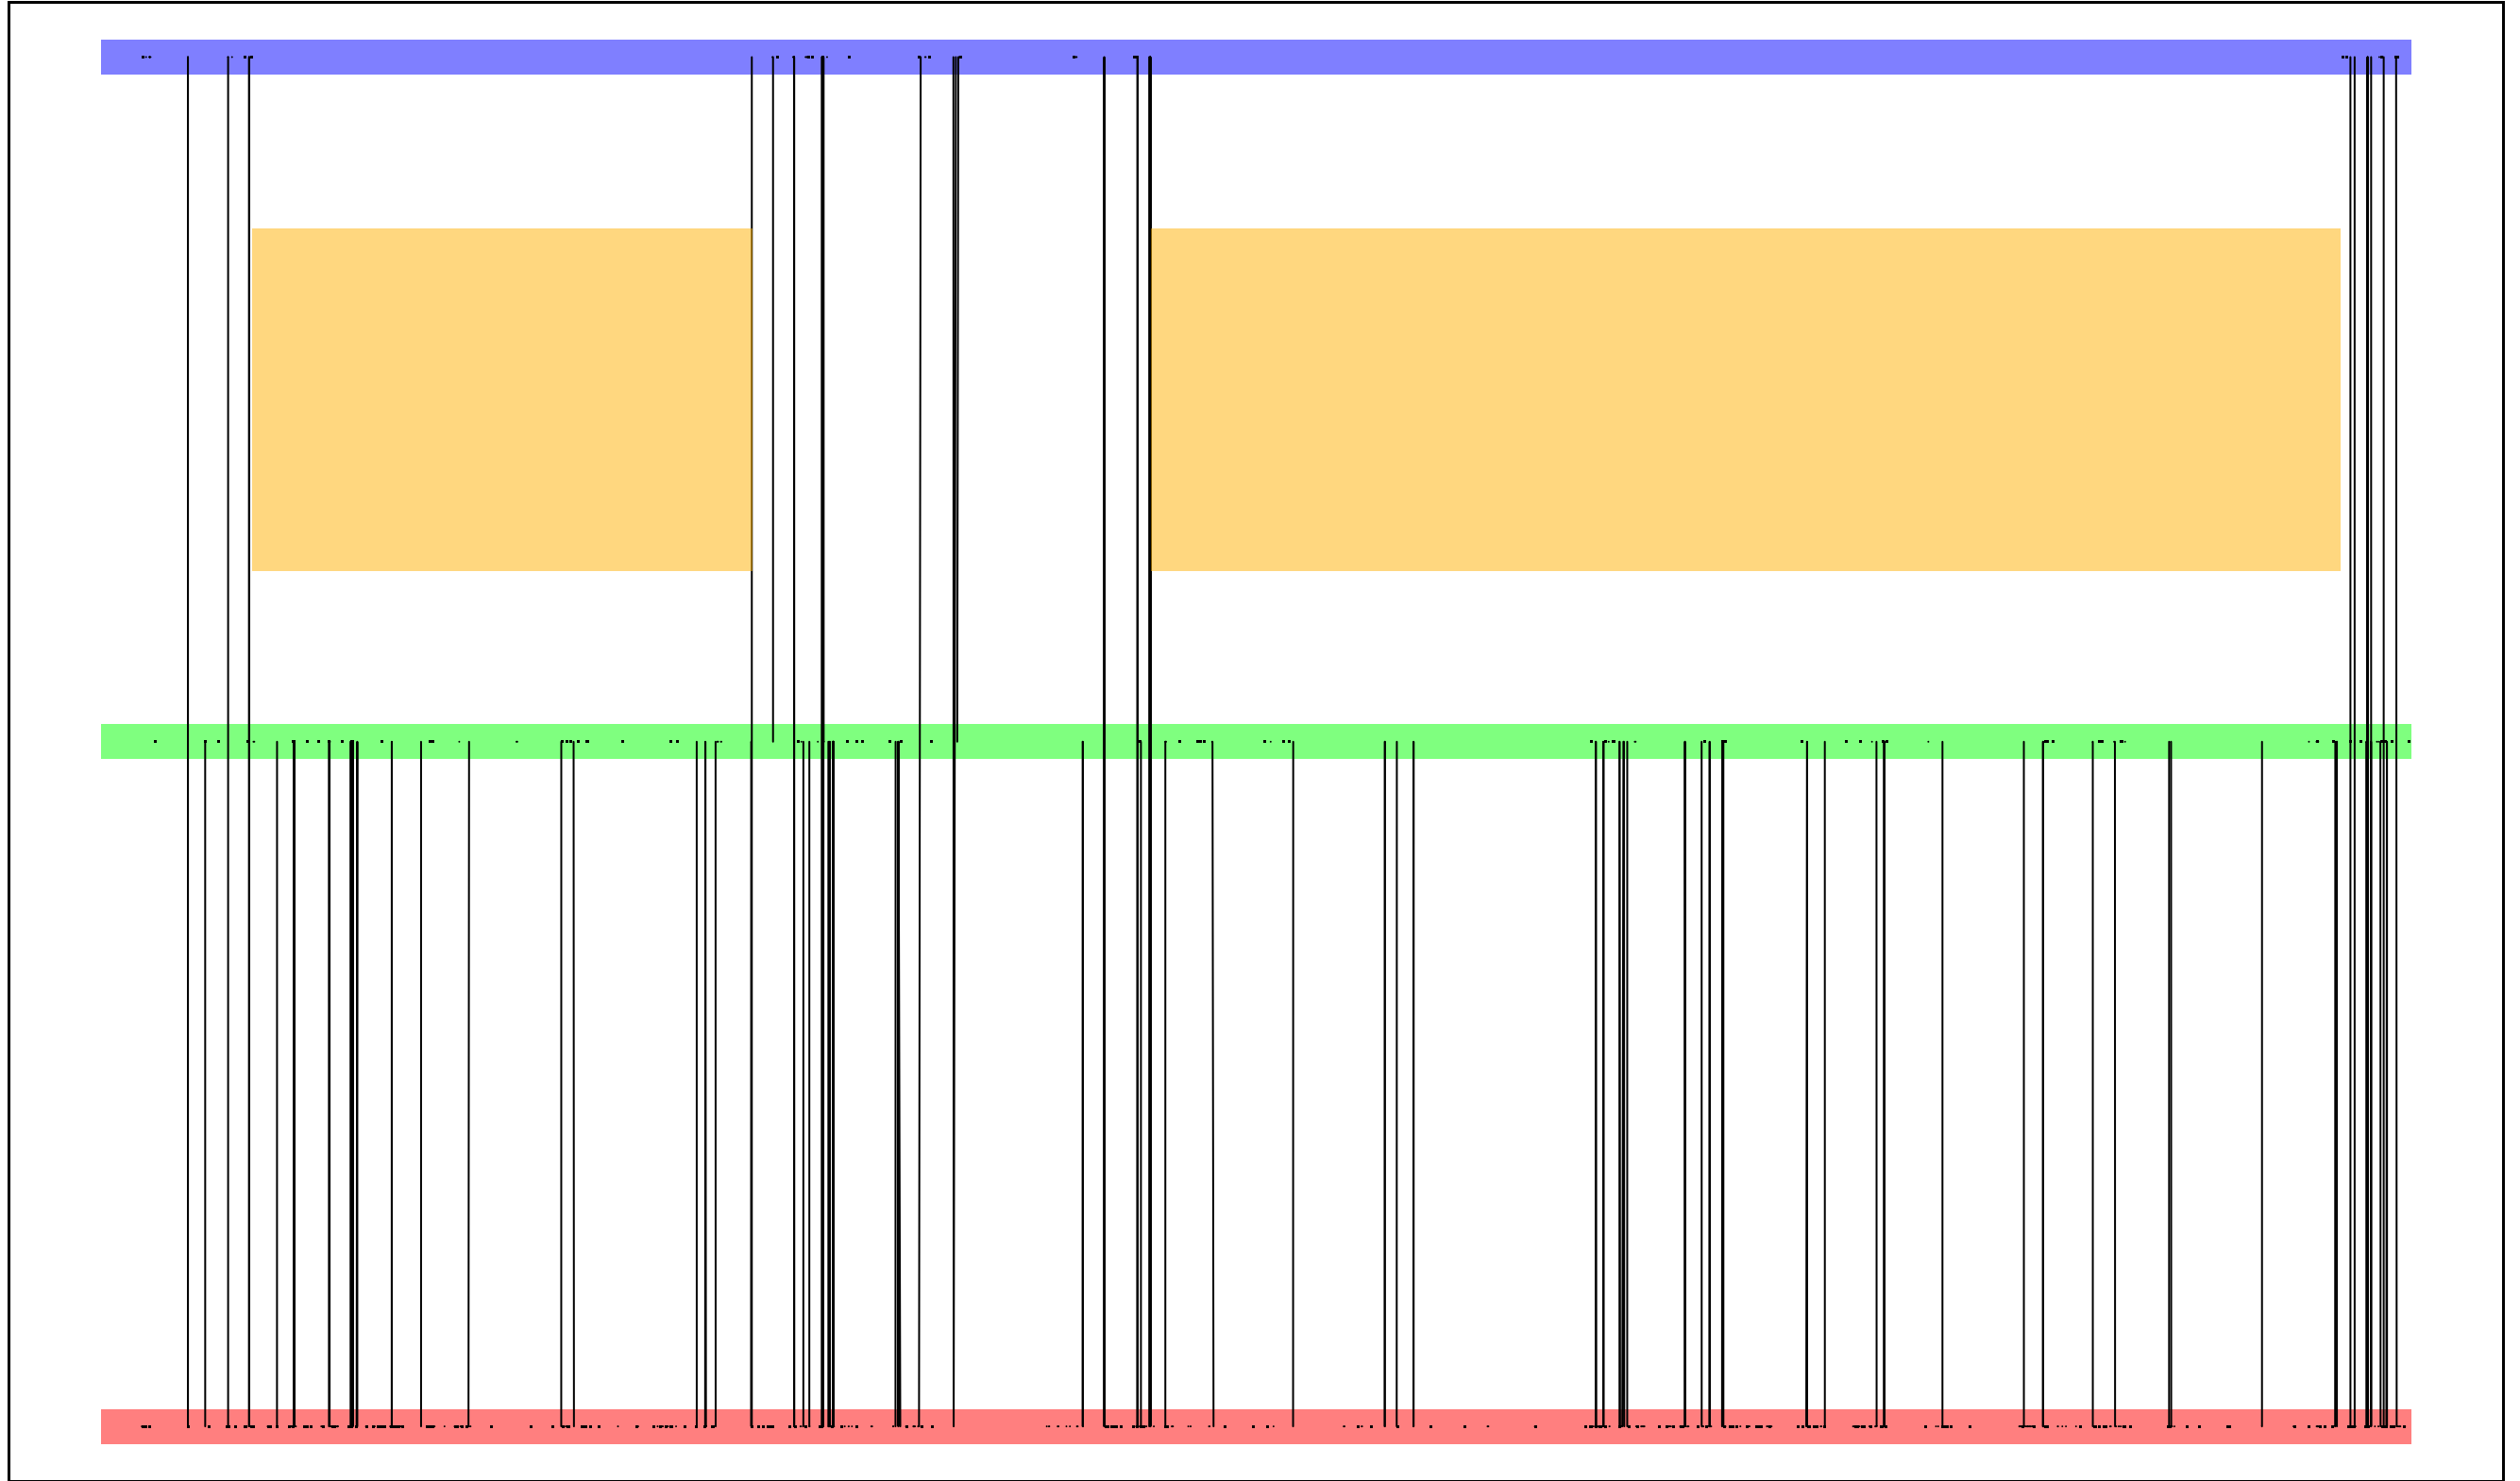

X Chromosome: Pos 1 – 154,899,846

5896 – 5897

DISCORDANT

CONCORDANT ALT

CONCORDANT REF

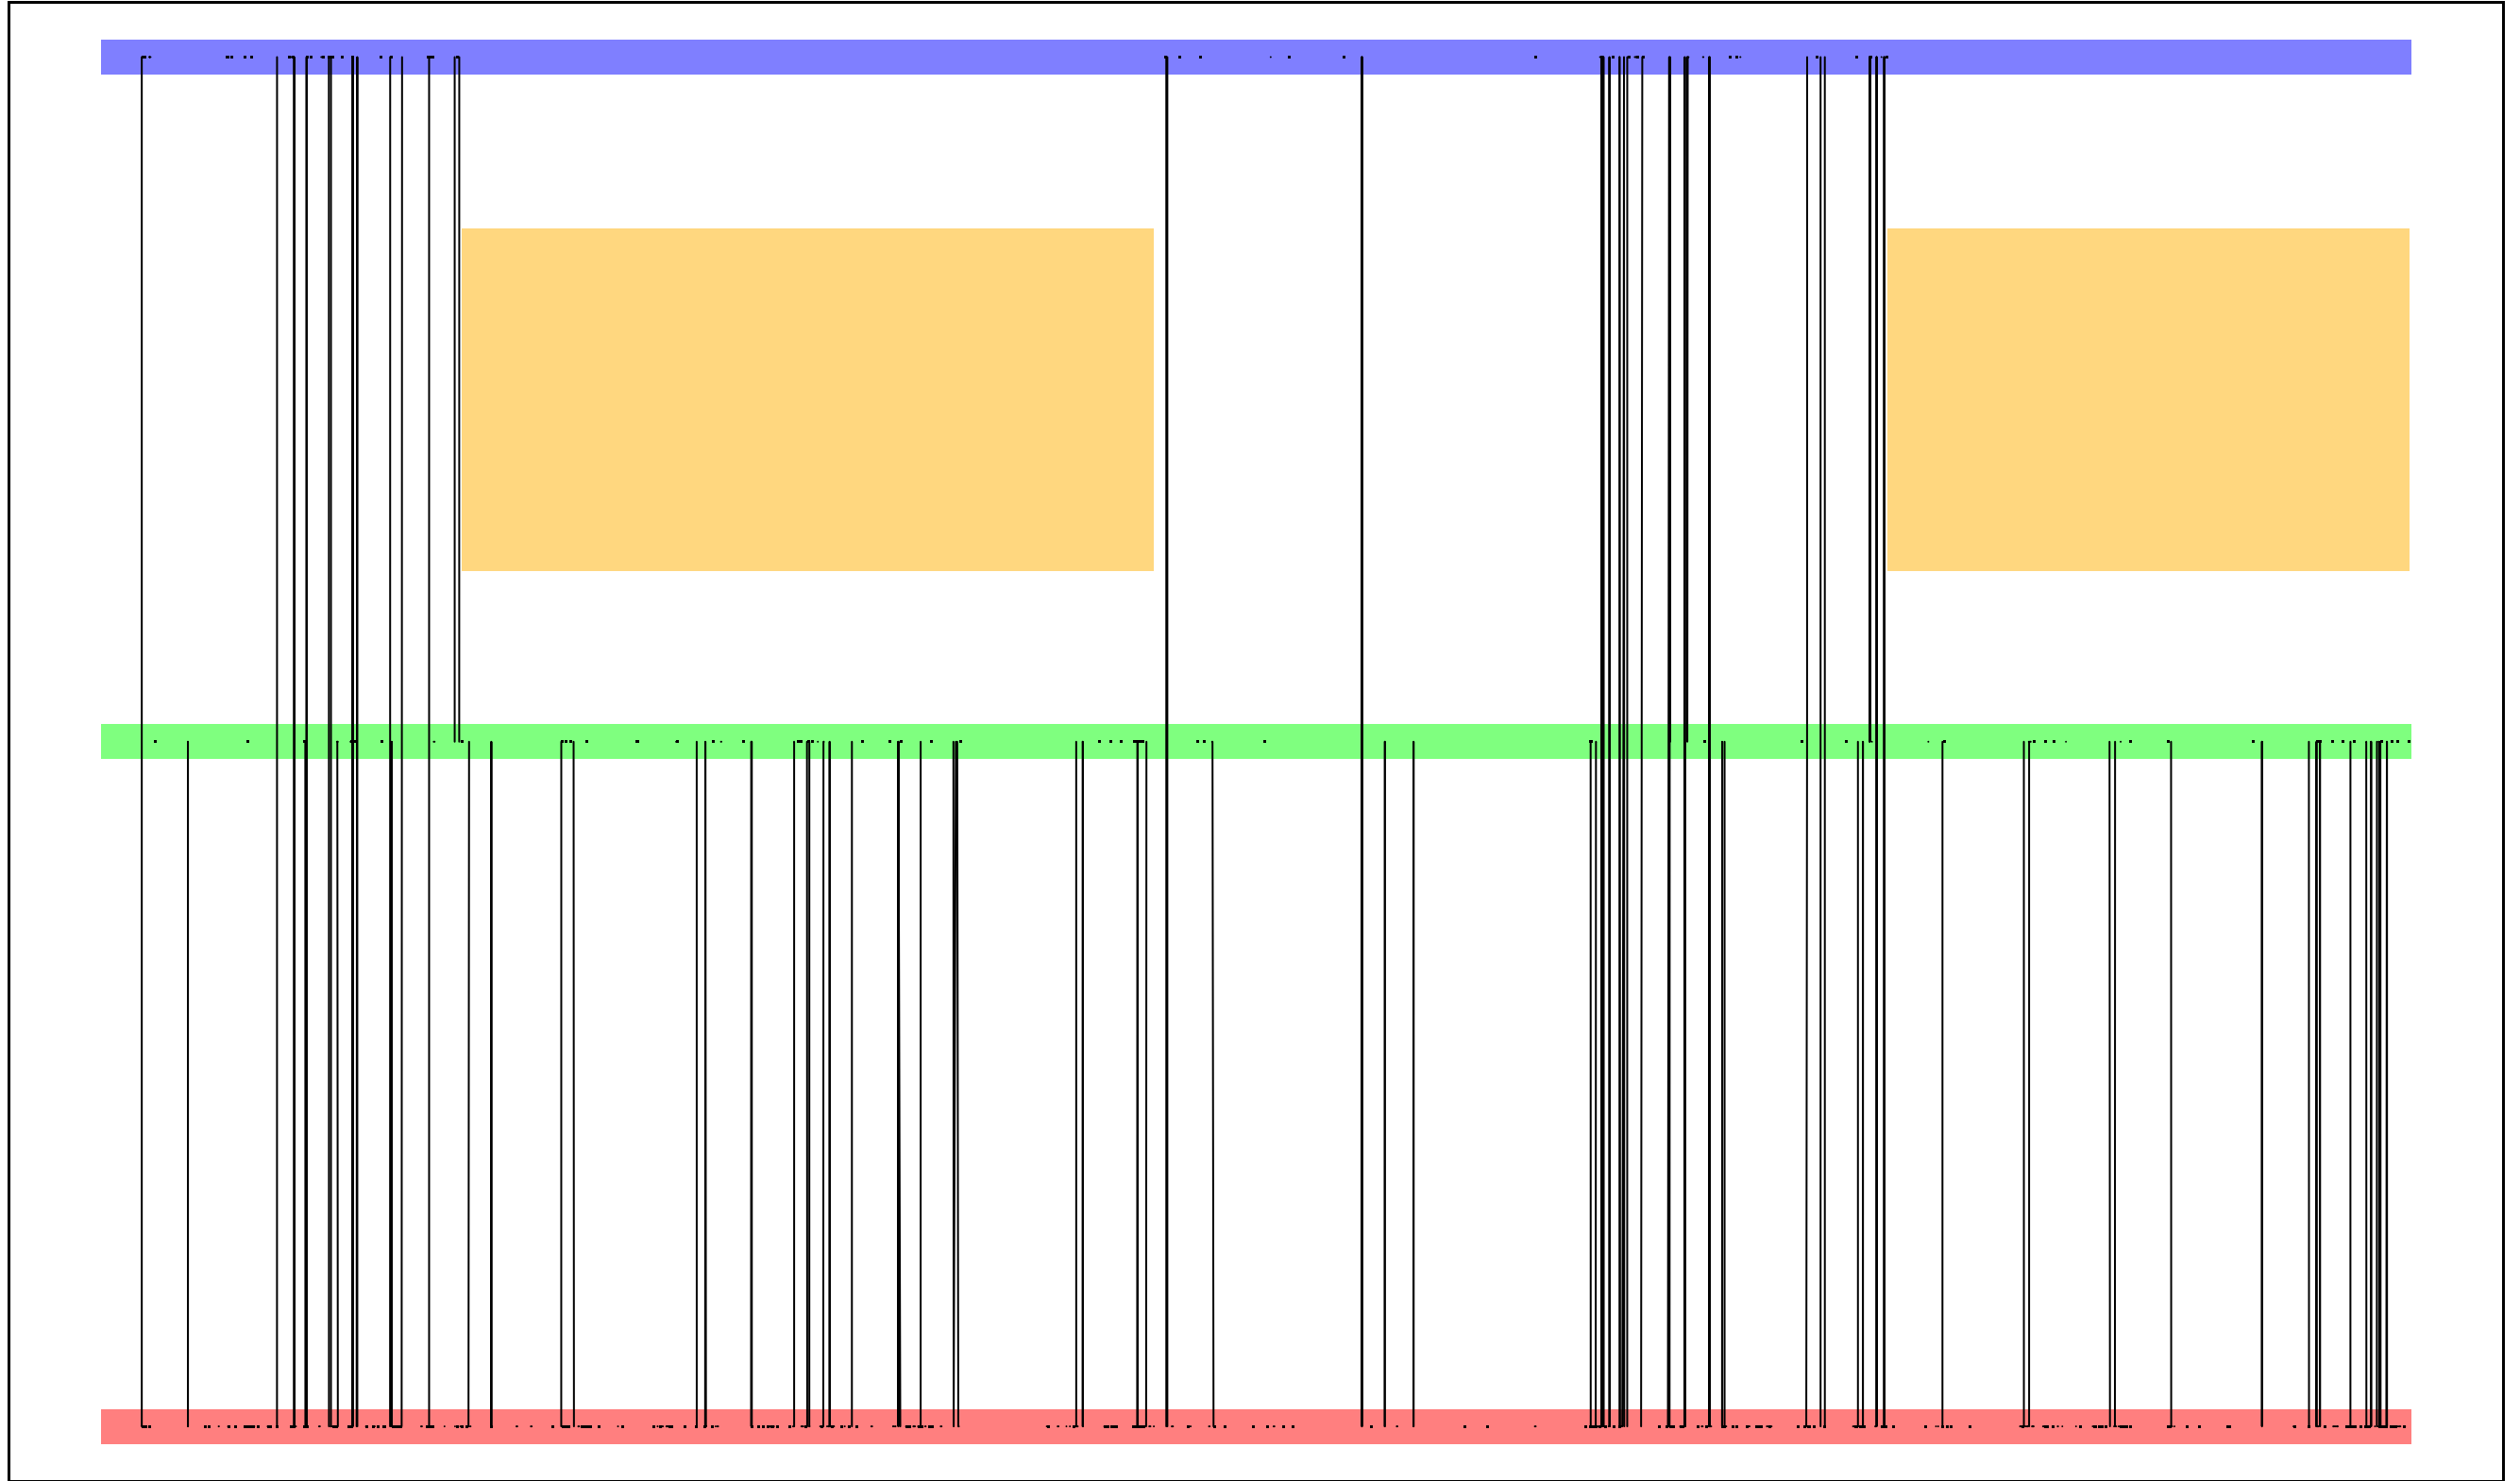

X Chromosome: Pos 1 – 154,899,846

cms0245 – cms0564

DISCORDANT

CONCORDANT ALT

CONCORDANT REF

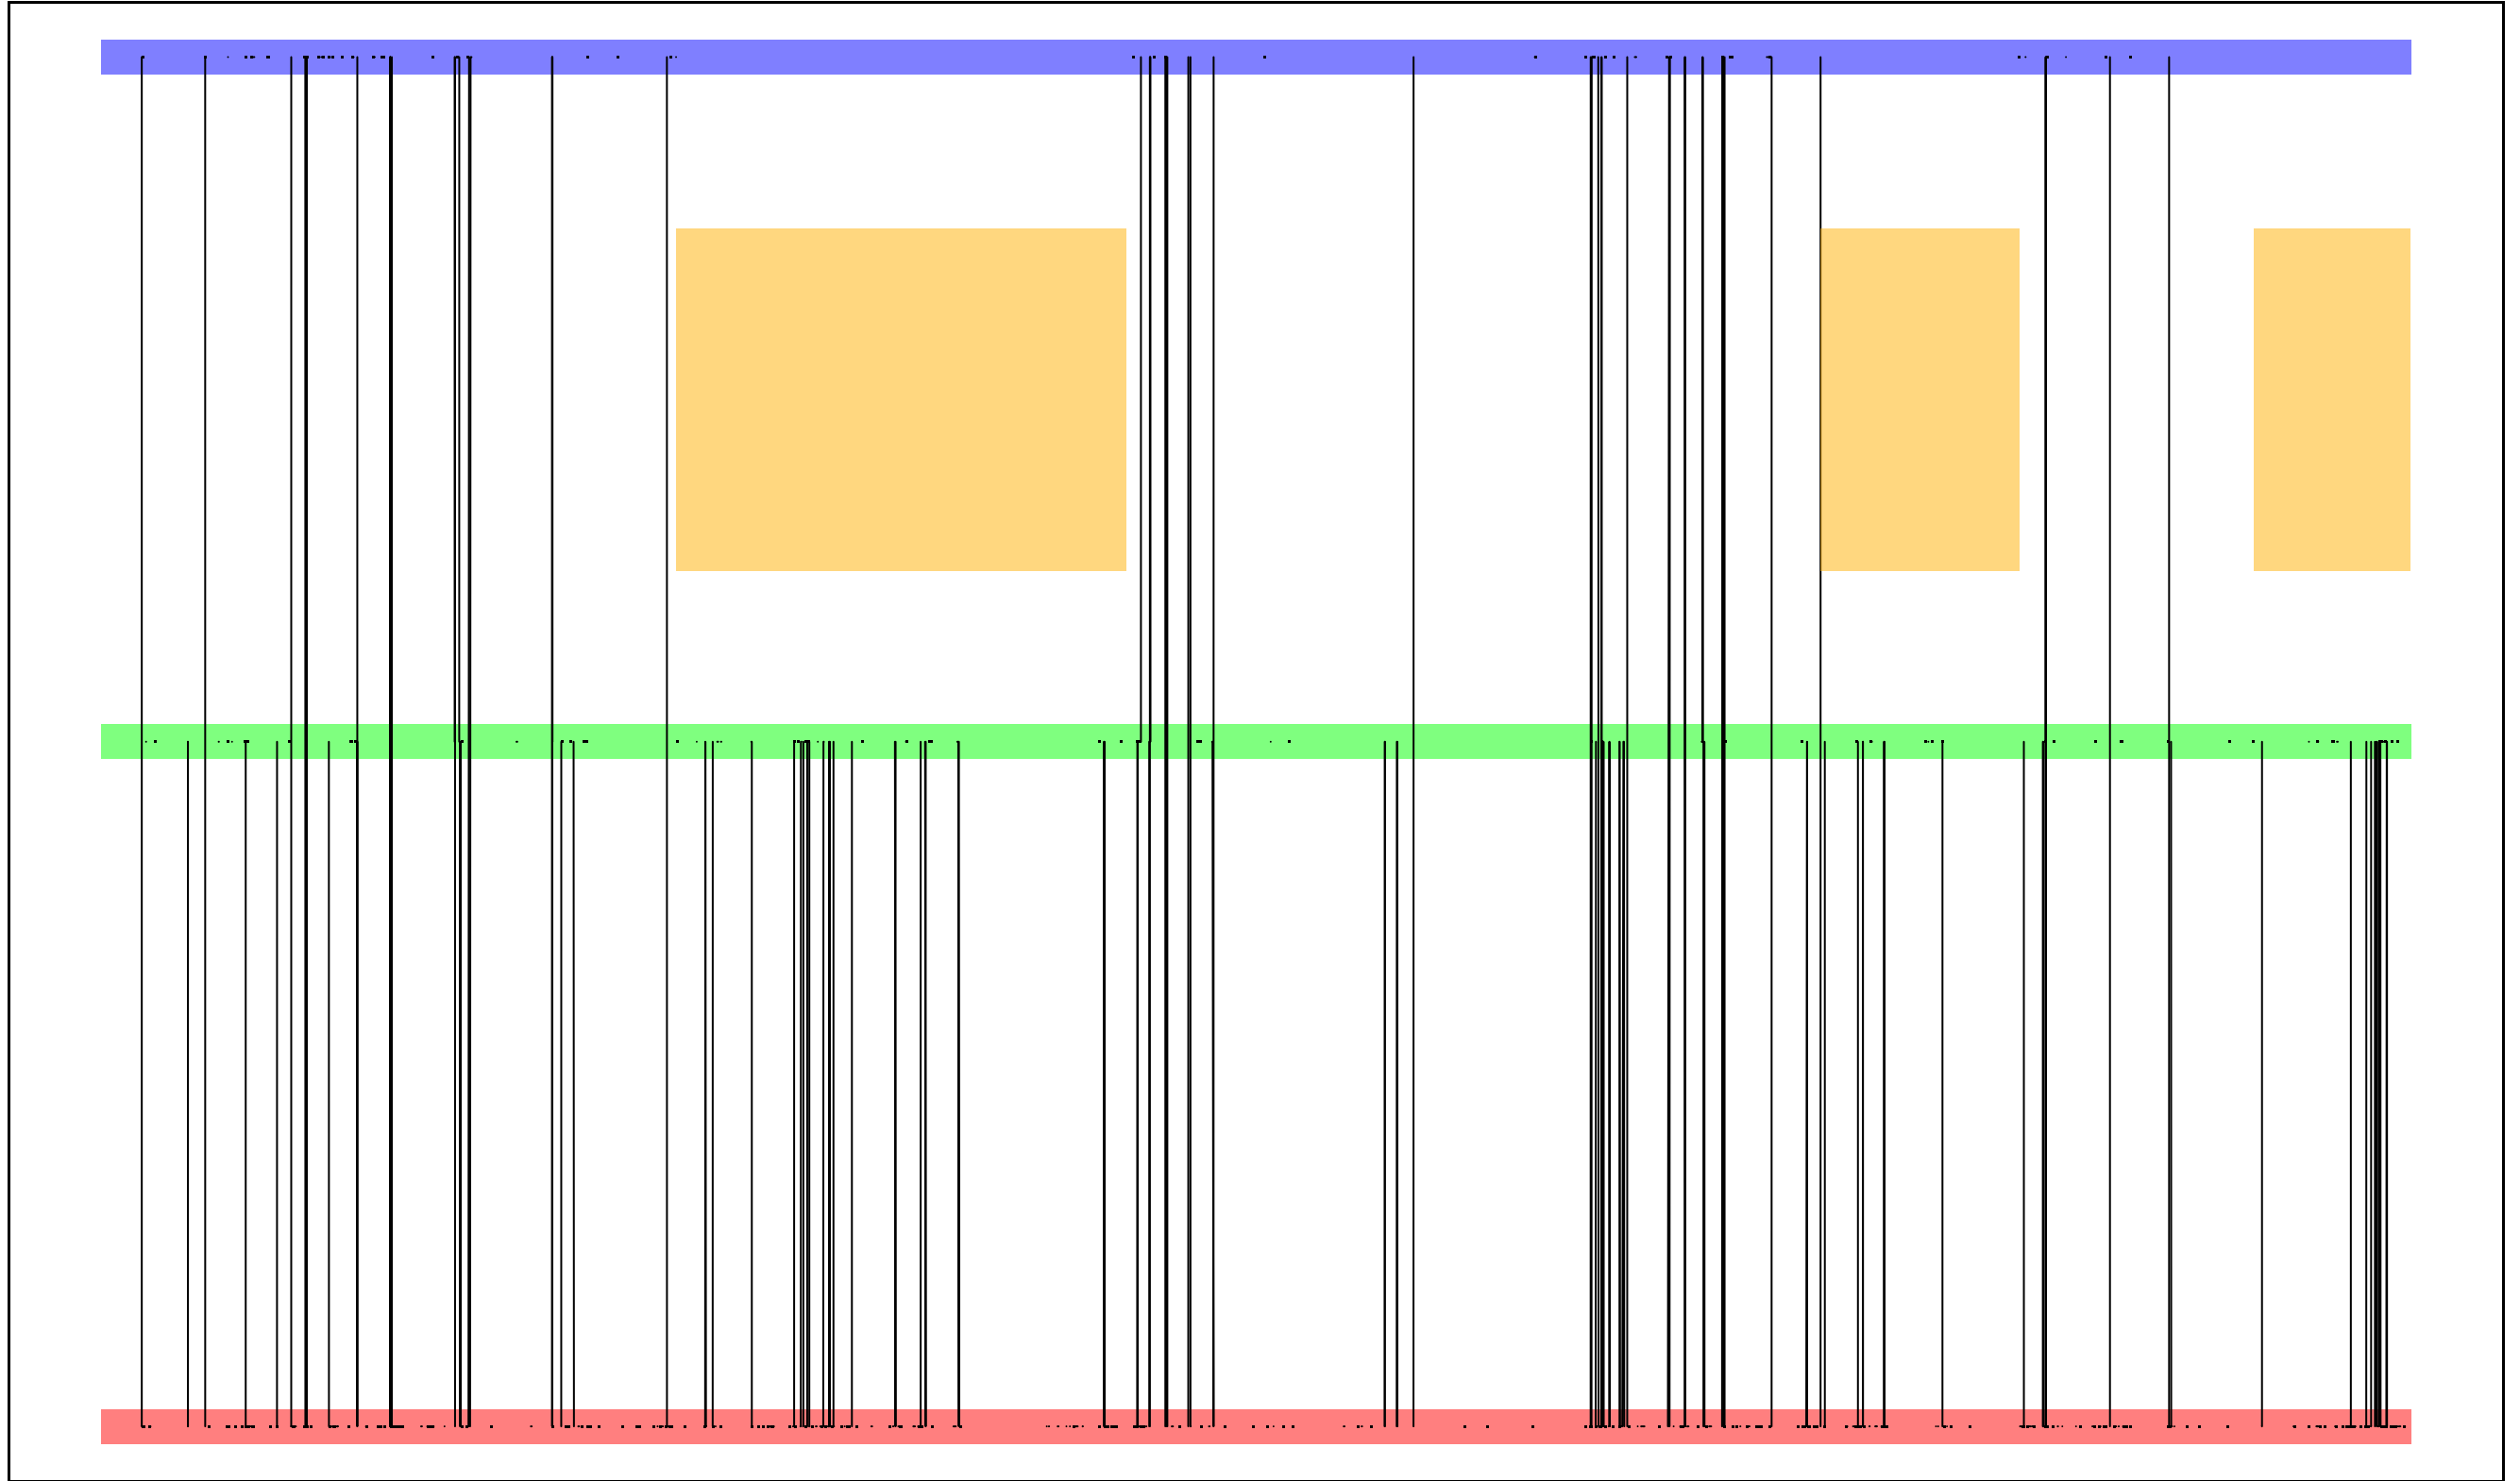

X Chromosome: Pos 1 – 154,899,846

cms1935 – cms1969

DISCORDANT

CONCORDANT ALT

CONCORDANT REF

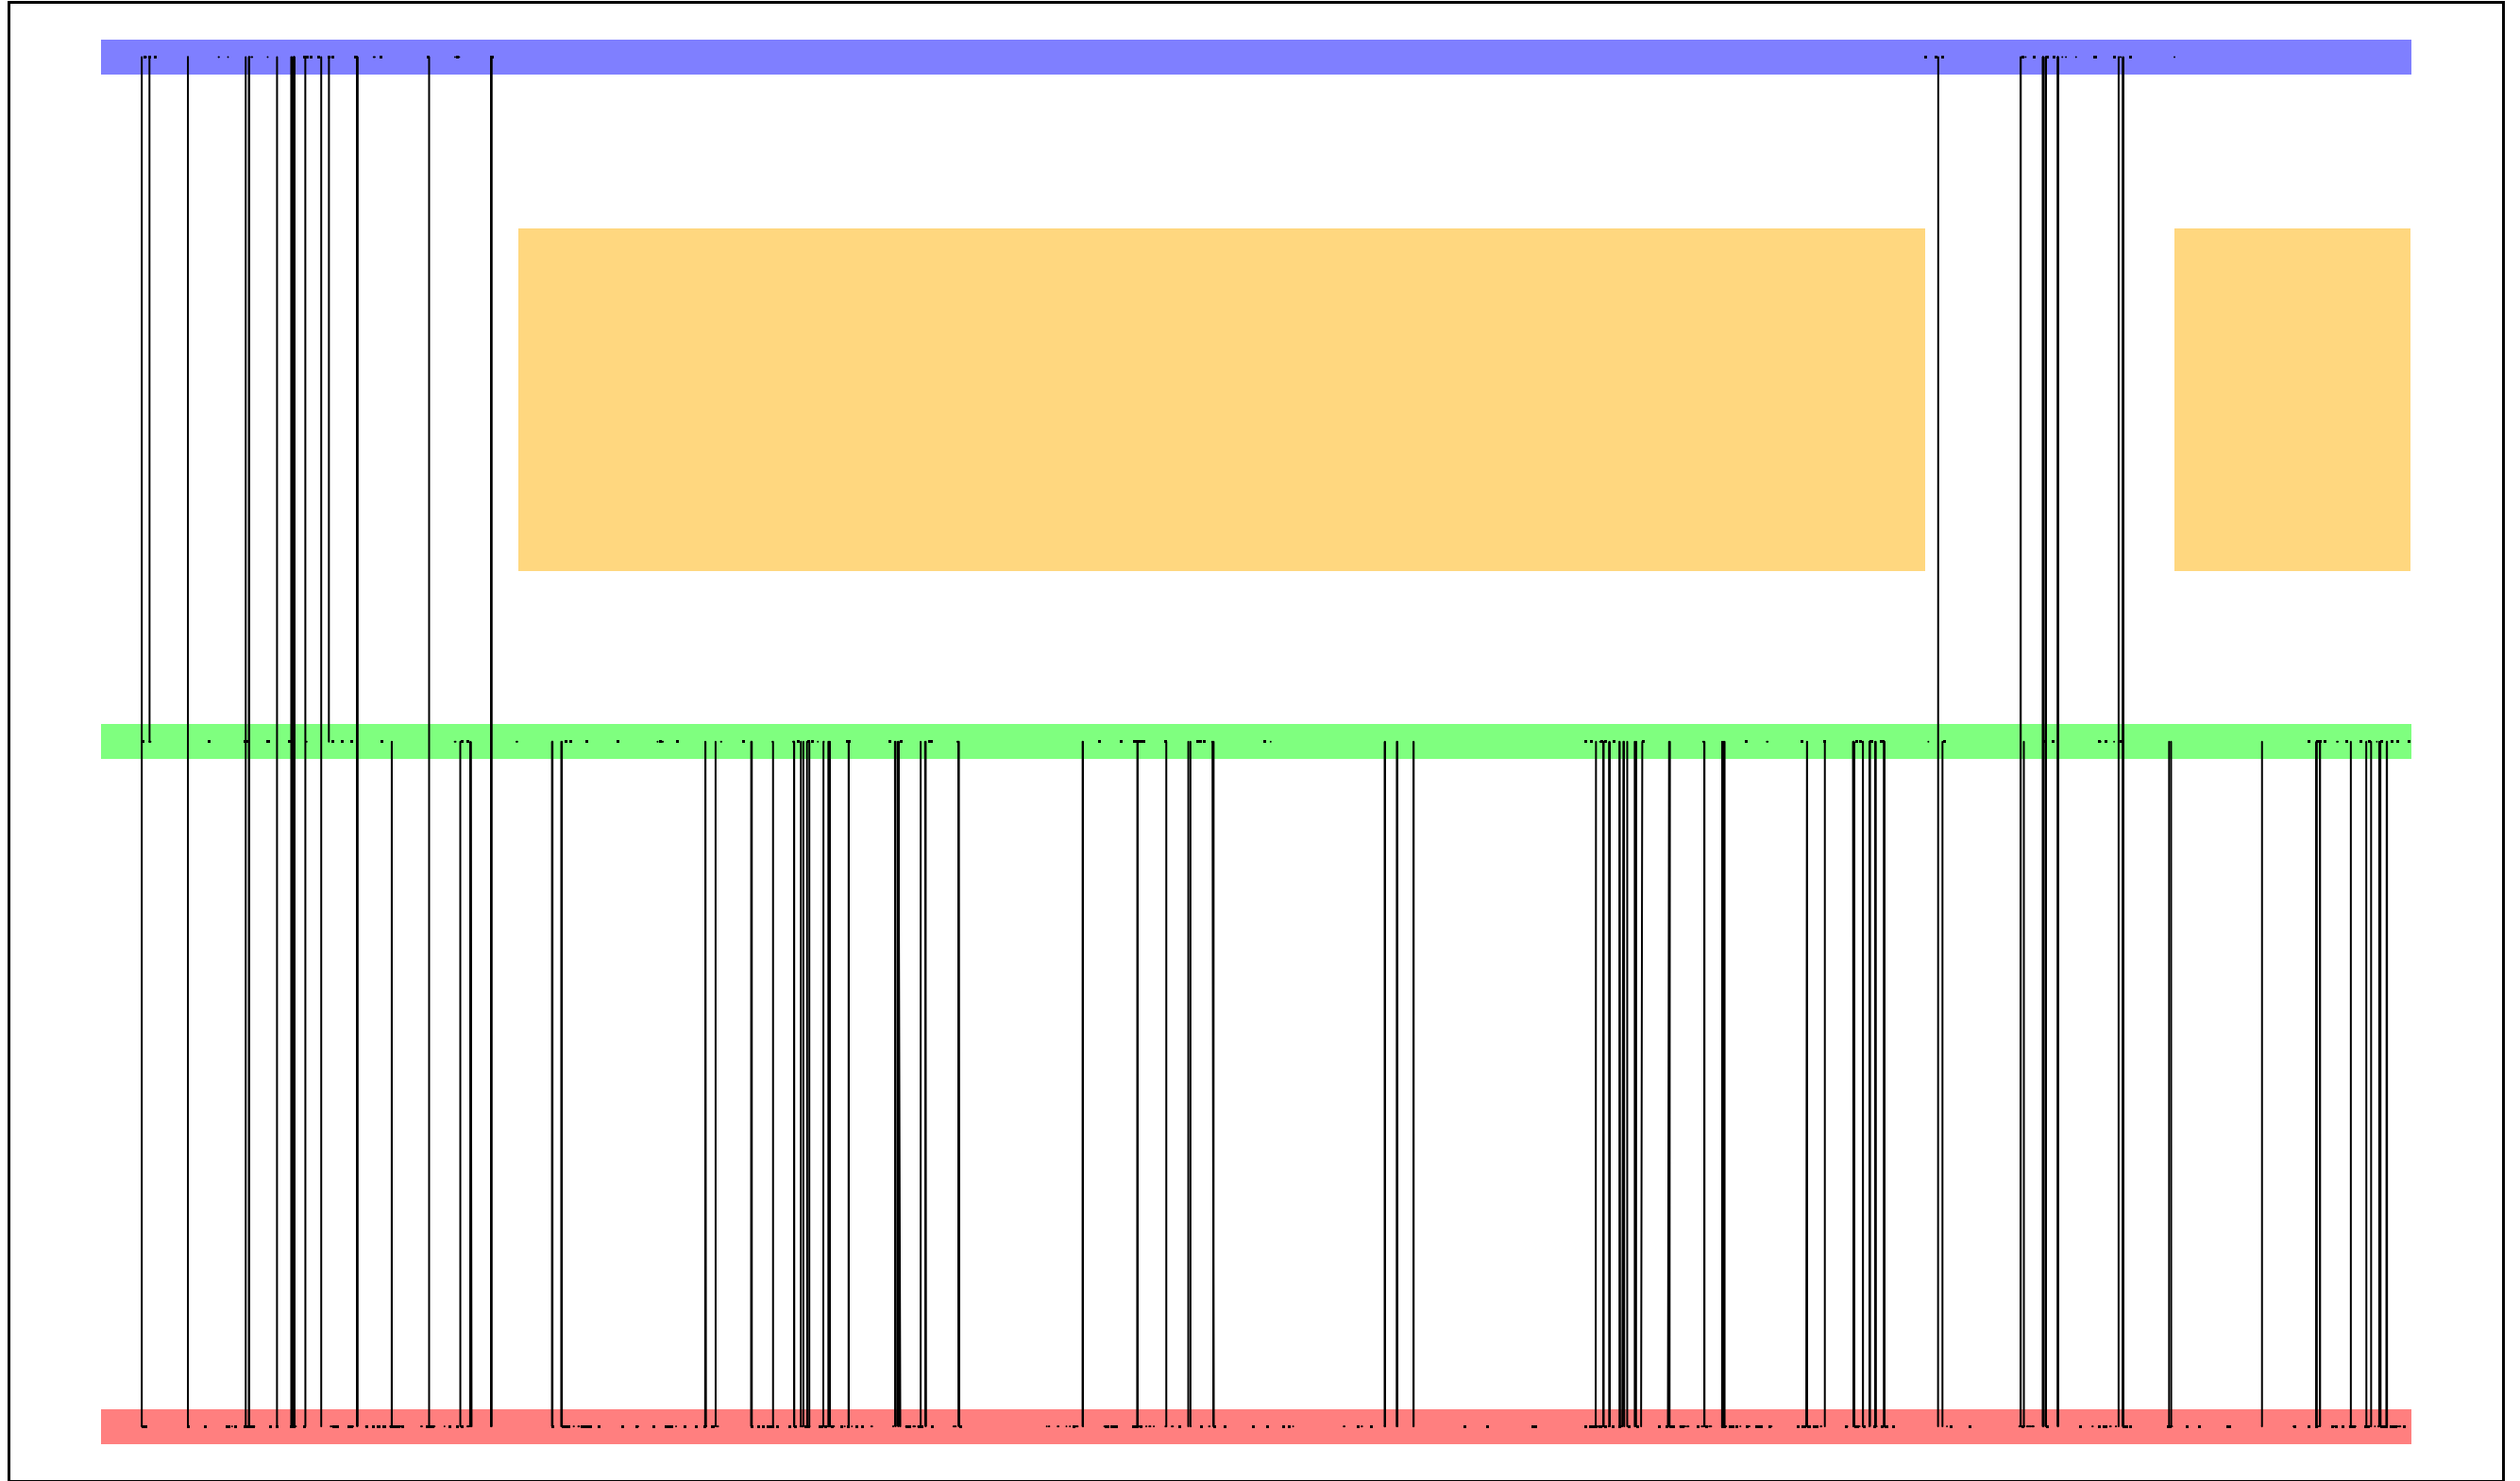

X Chromosome: Pos 1 – 154,899,846

cms3181 – cms3183

DISCORDANT

CONCORDANT ALT

CONCORDANT REF

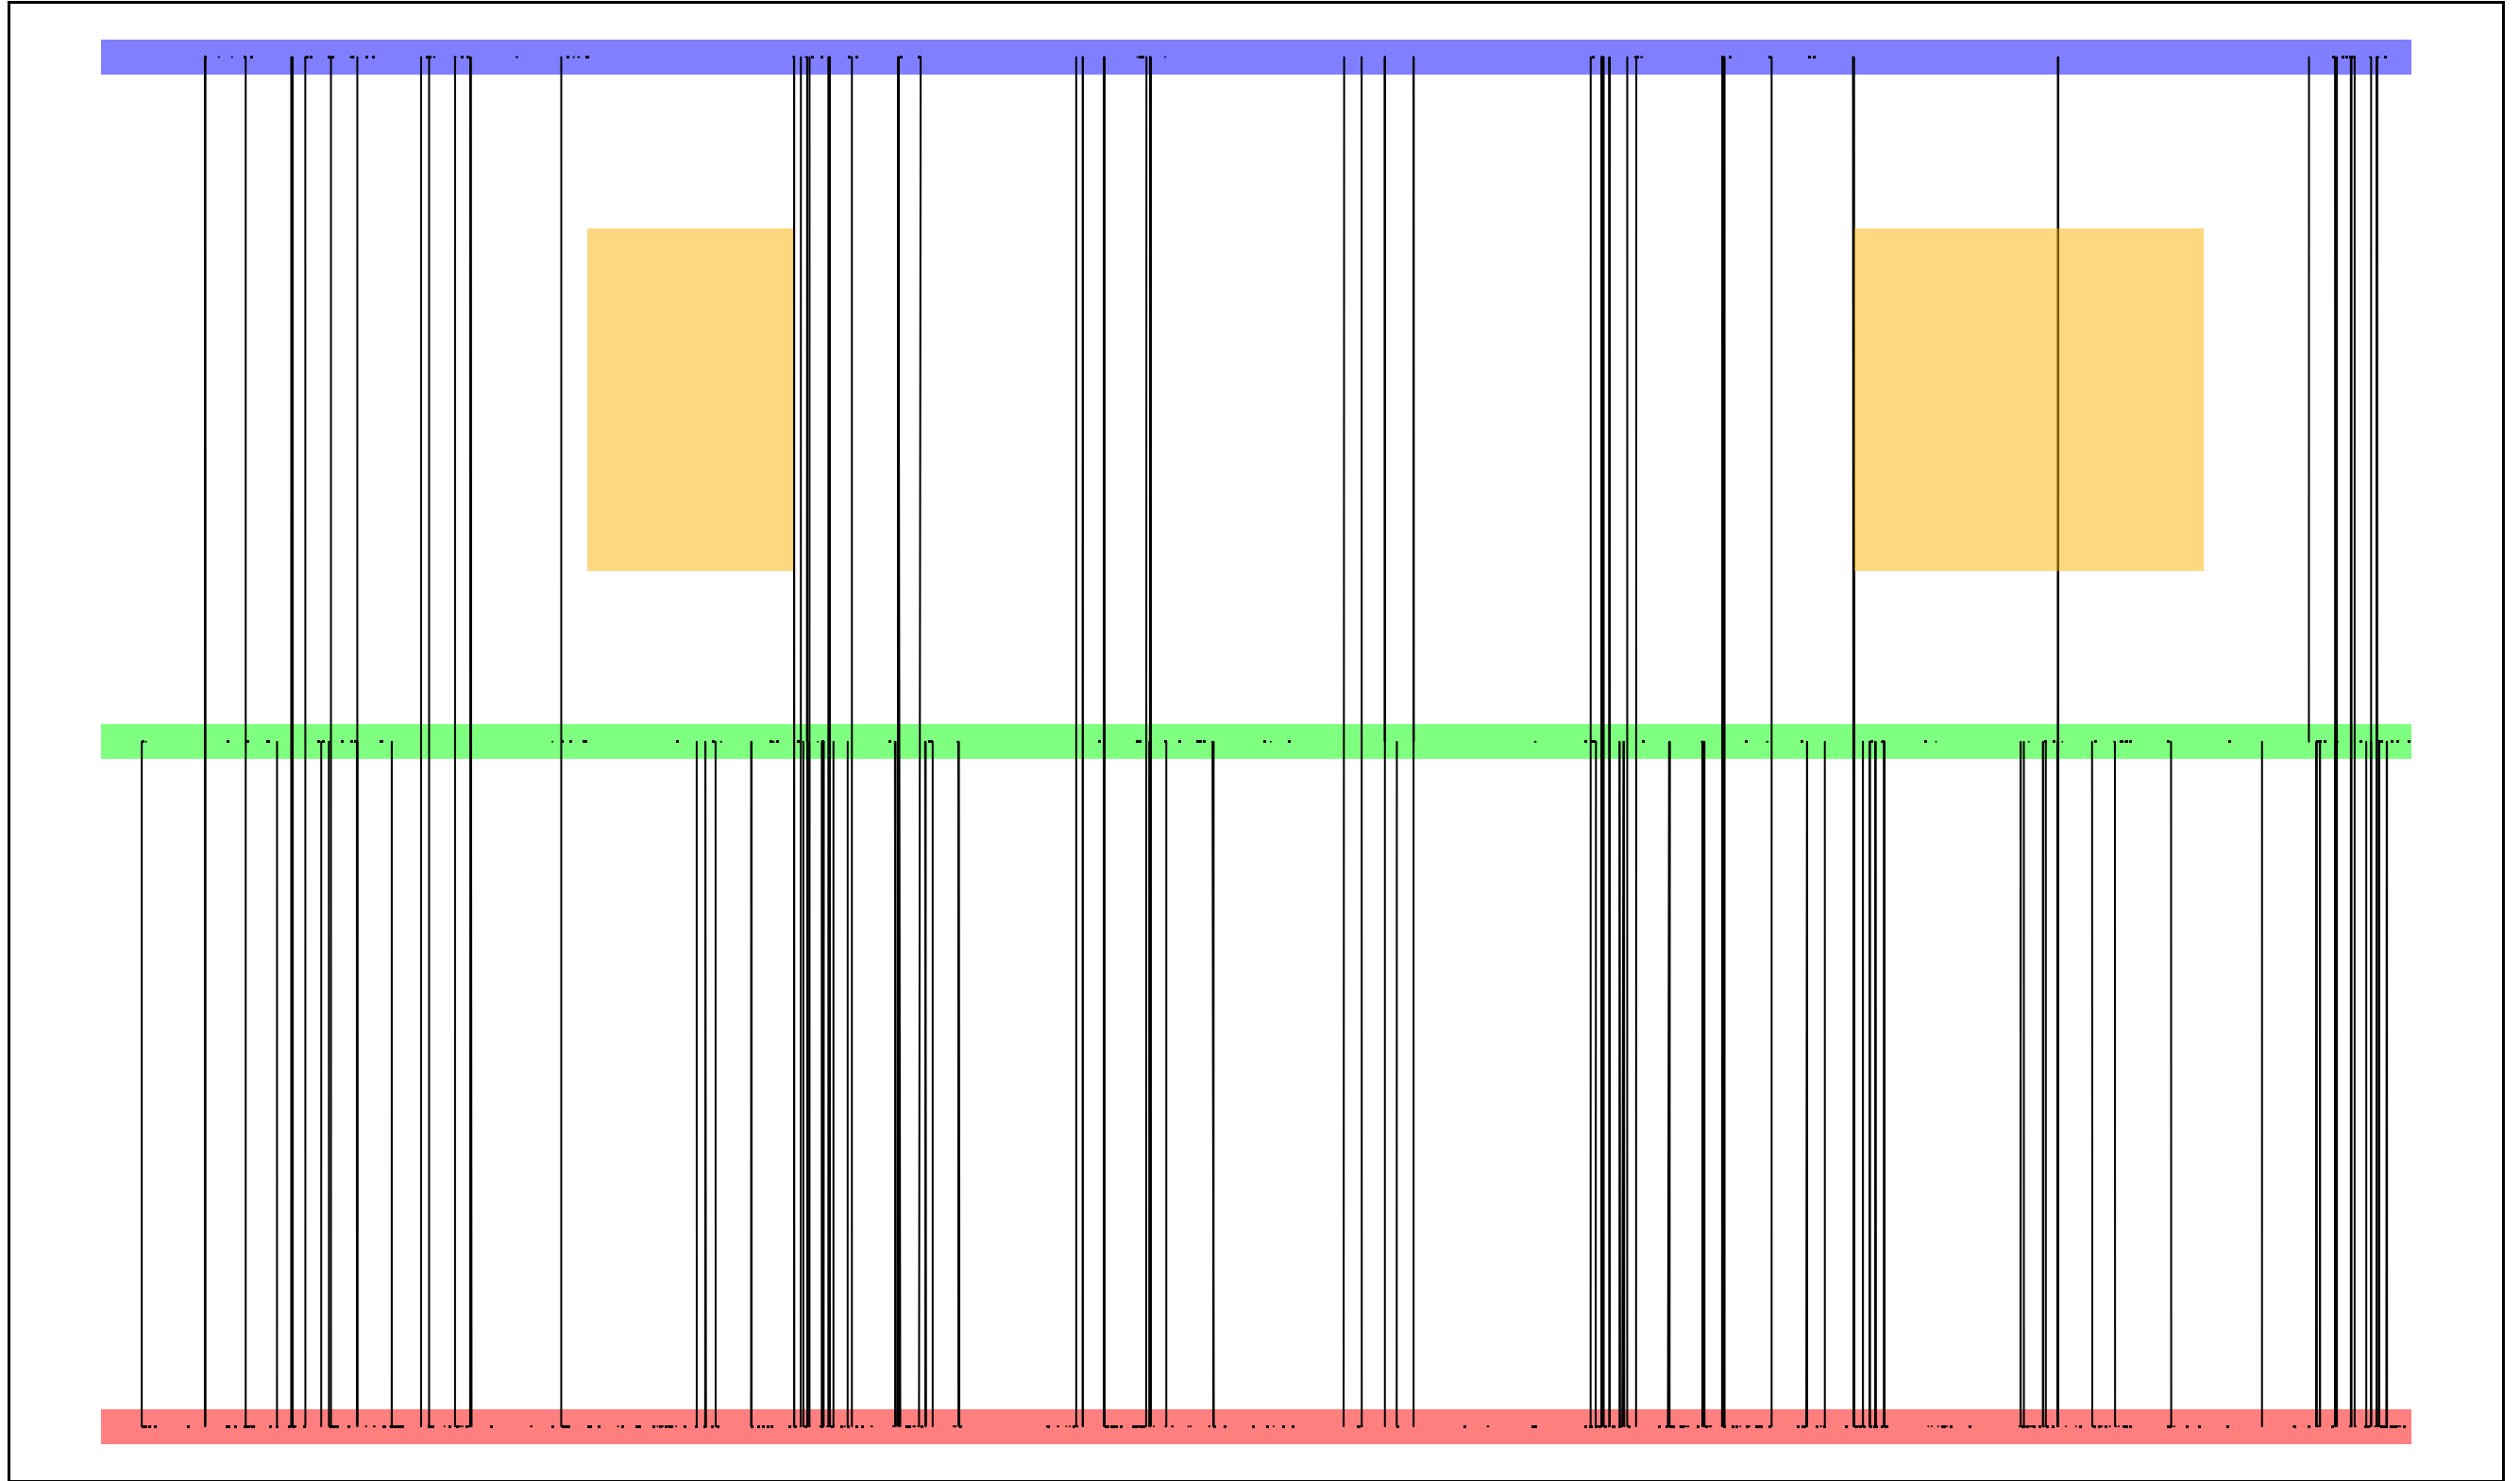

X Chromosome: Pos 1 – 154,899,846

cms4418 – cms4419

DISCORDANT

CONCORDANT ALT

CONCORDANT REF

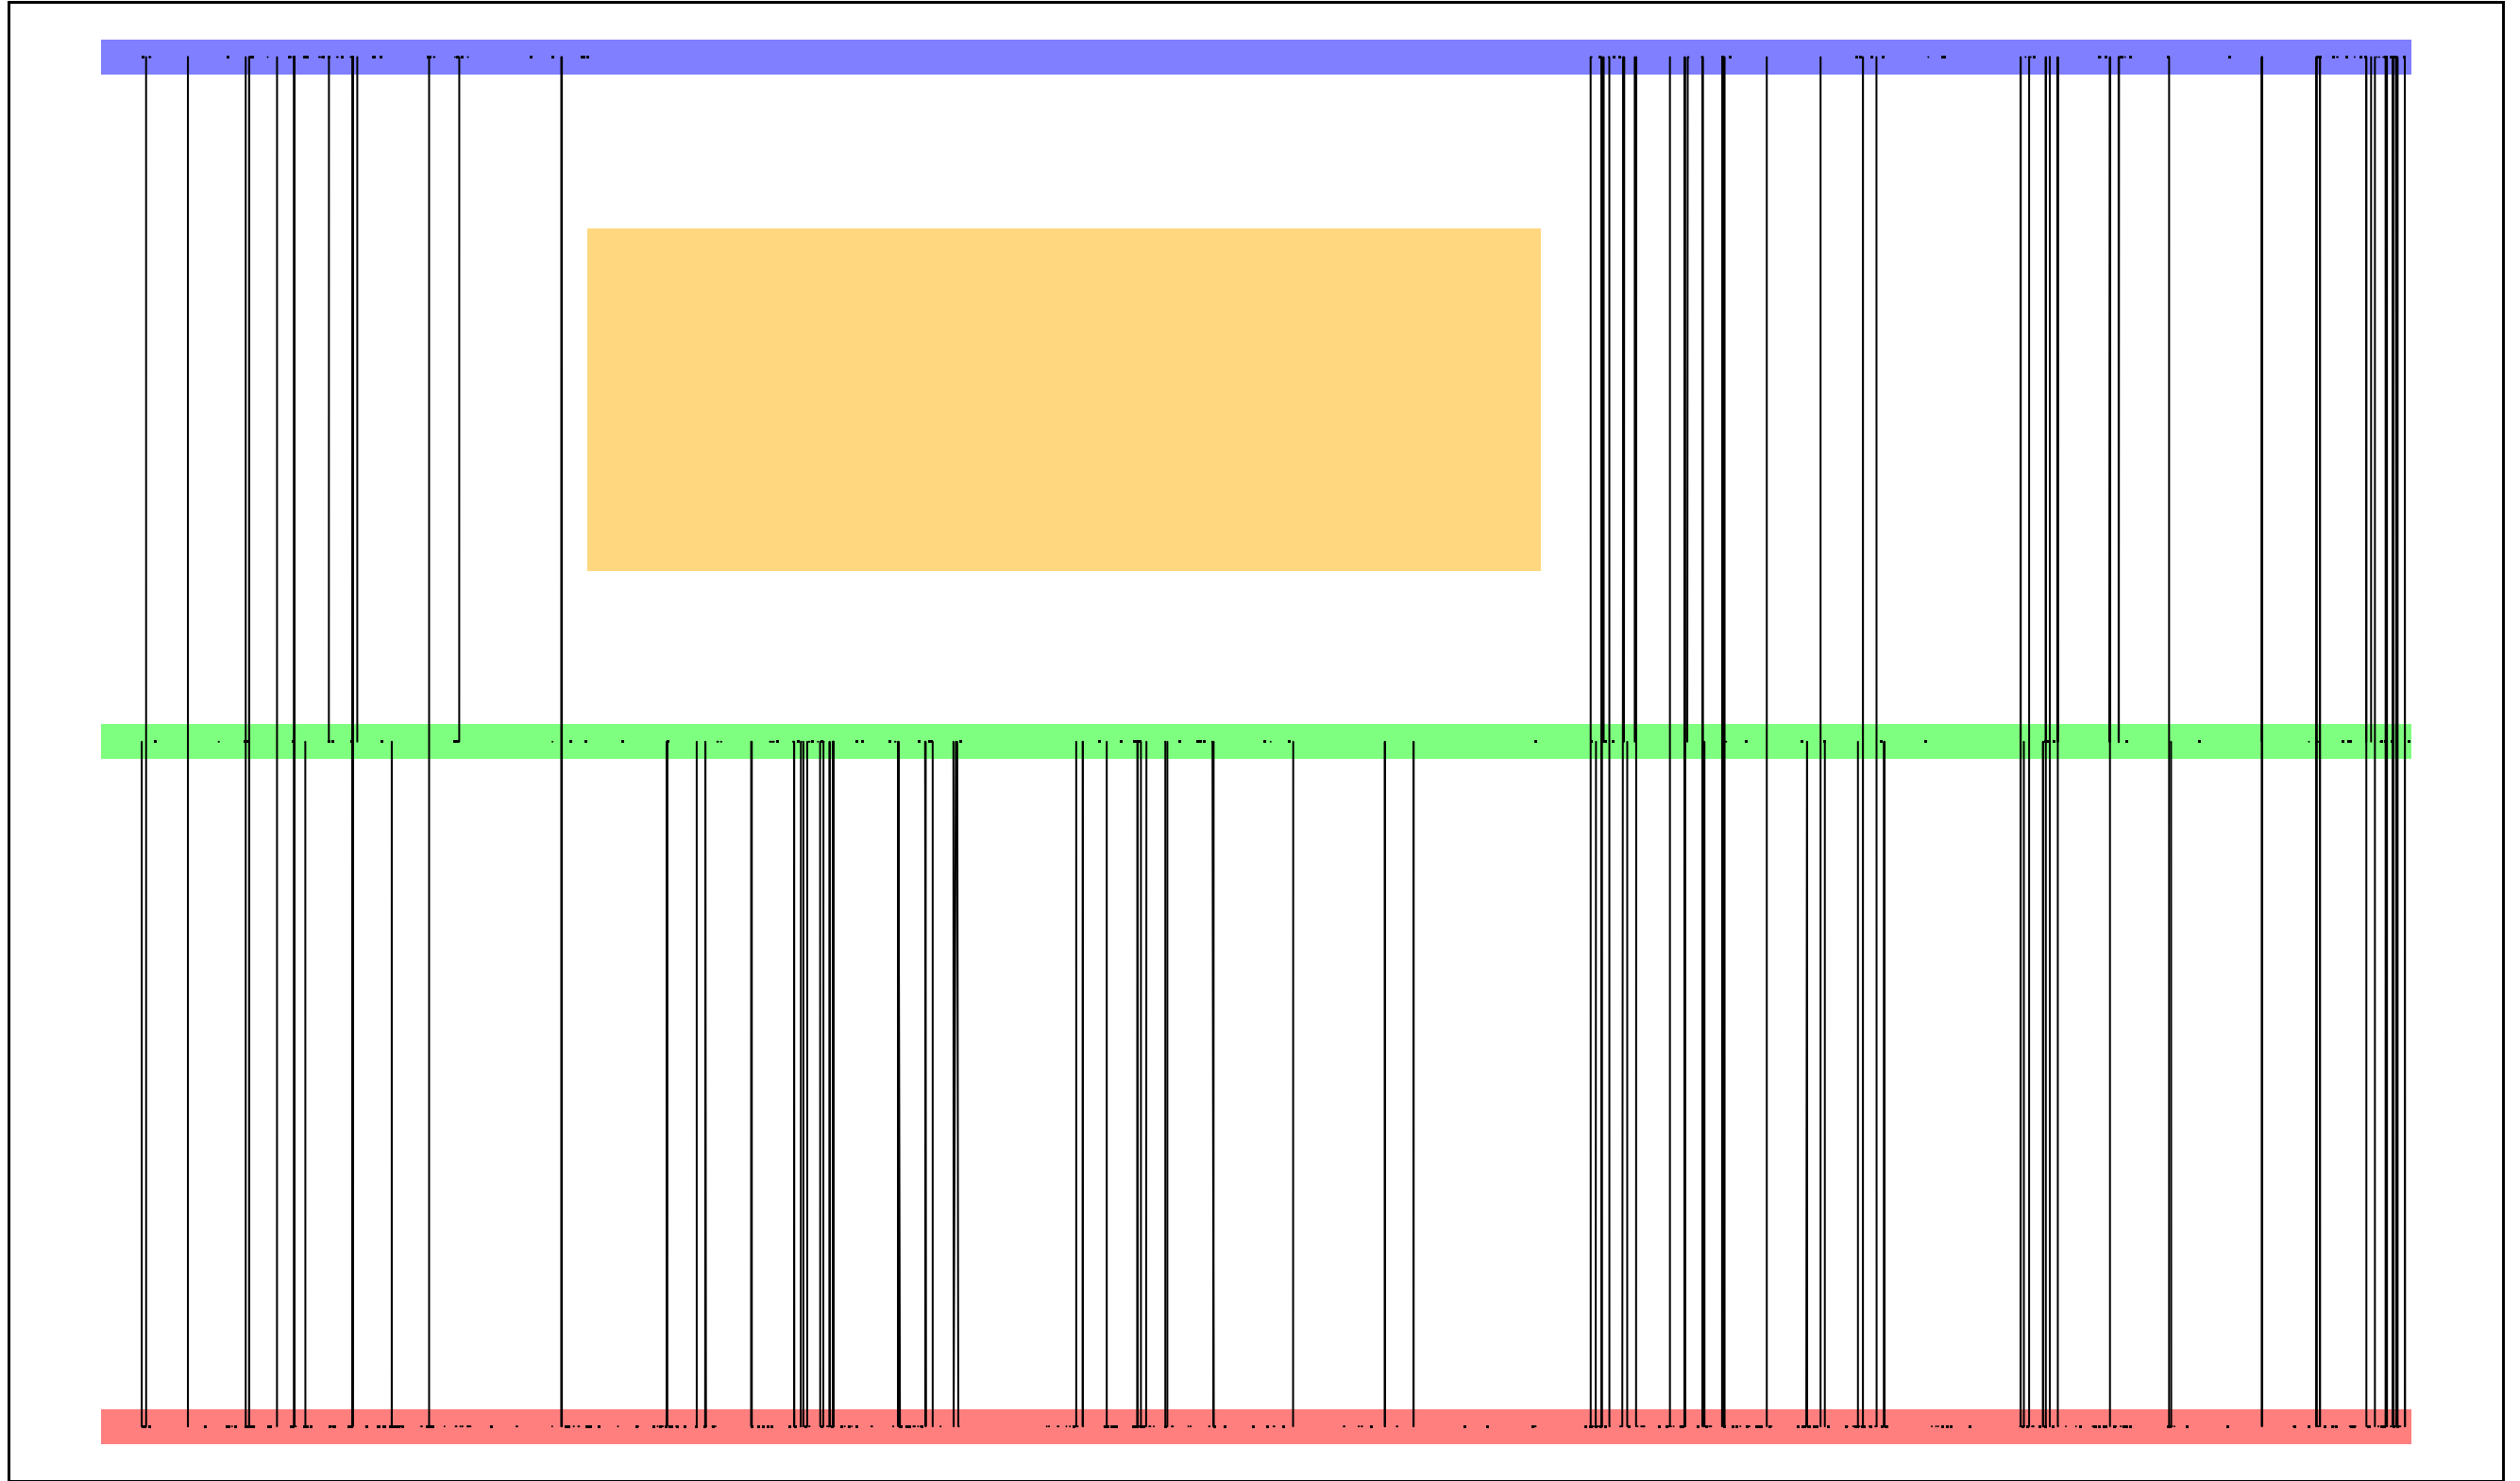

X Chromosome: Pos 1 – 154,899,846

cms3750 – cms5079

DISCORDANT

CONCORDANT ALT

CONCORDANT REF

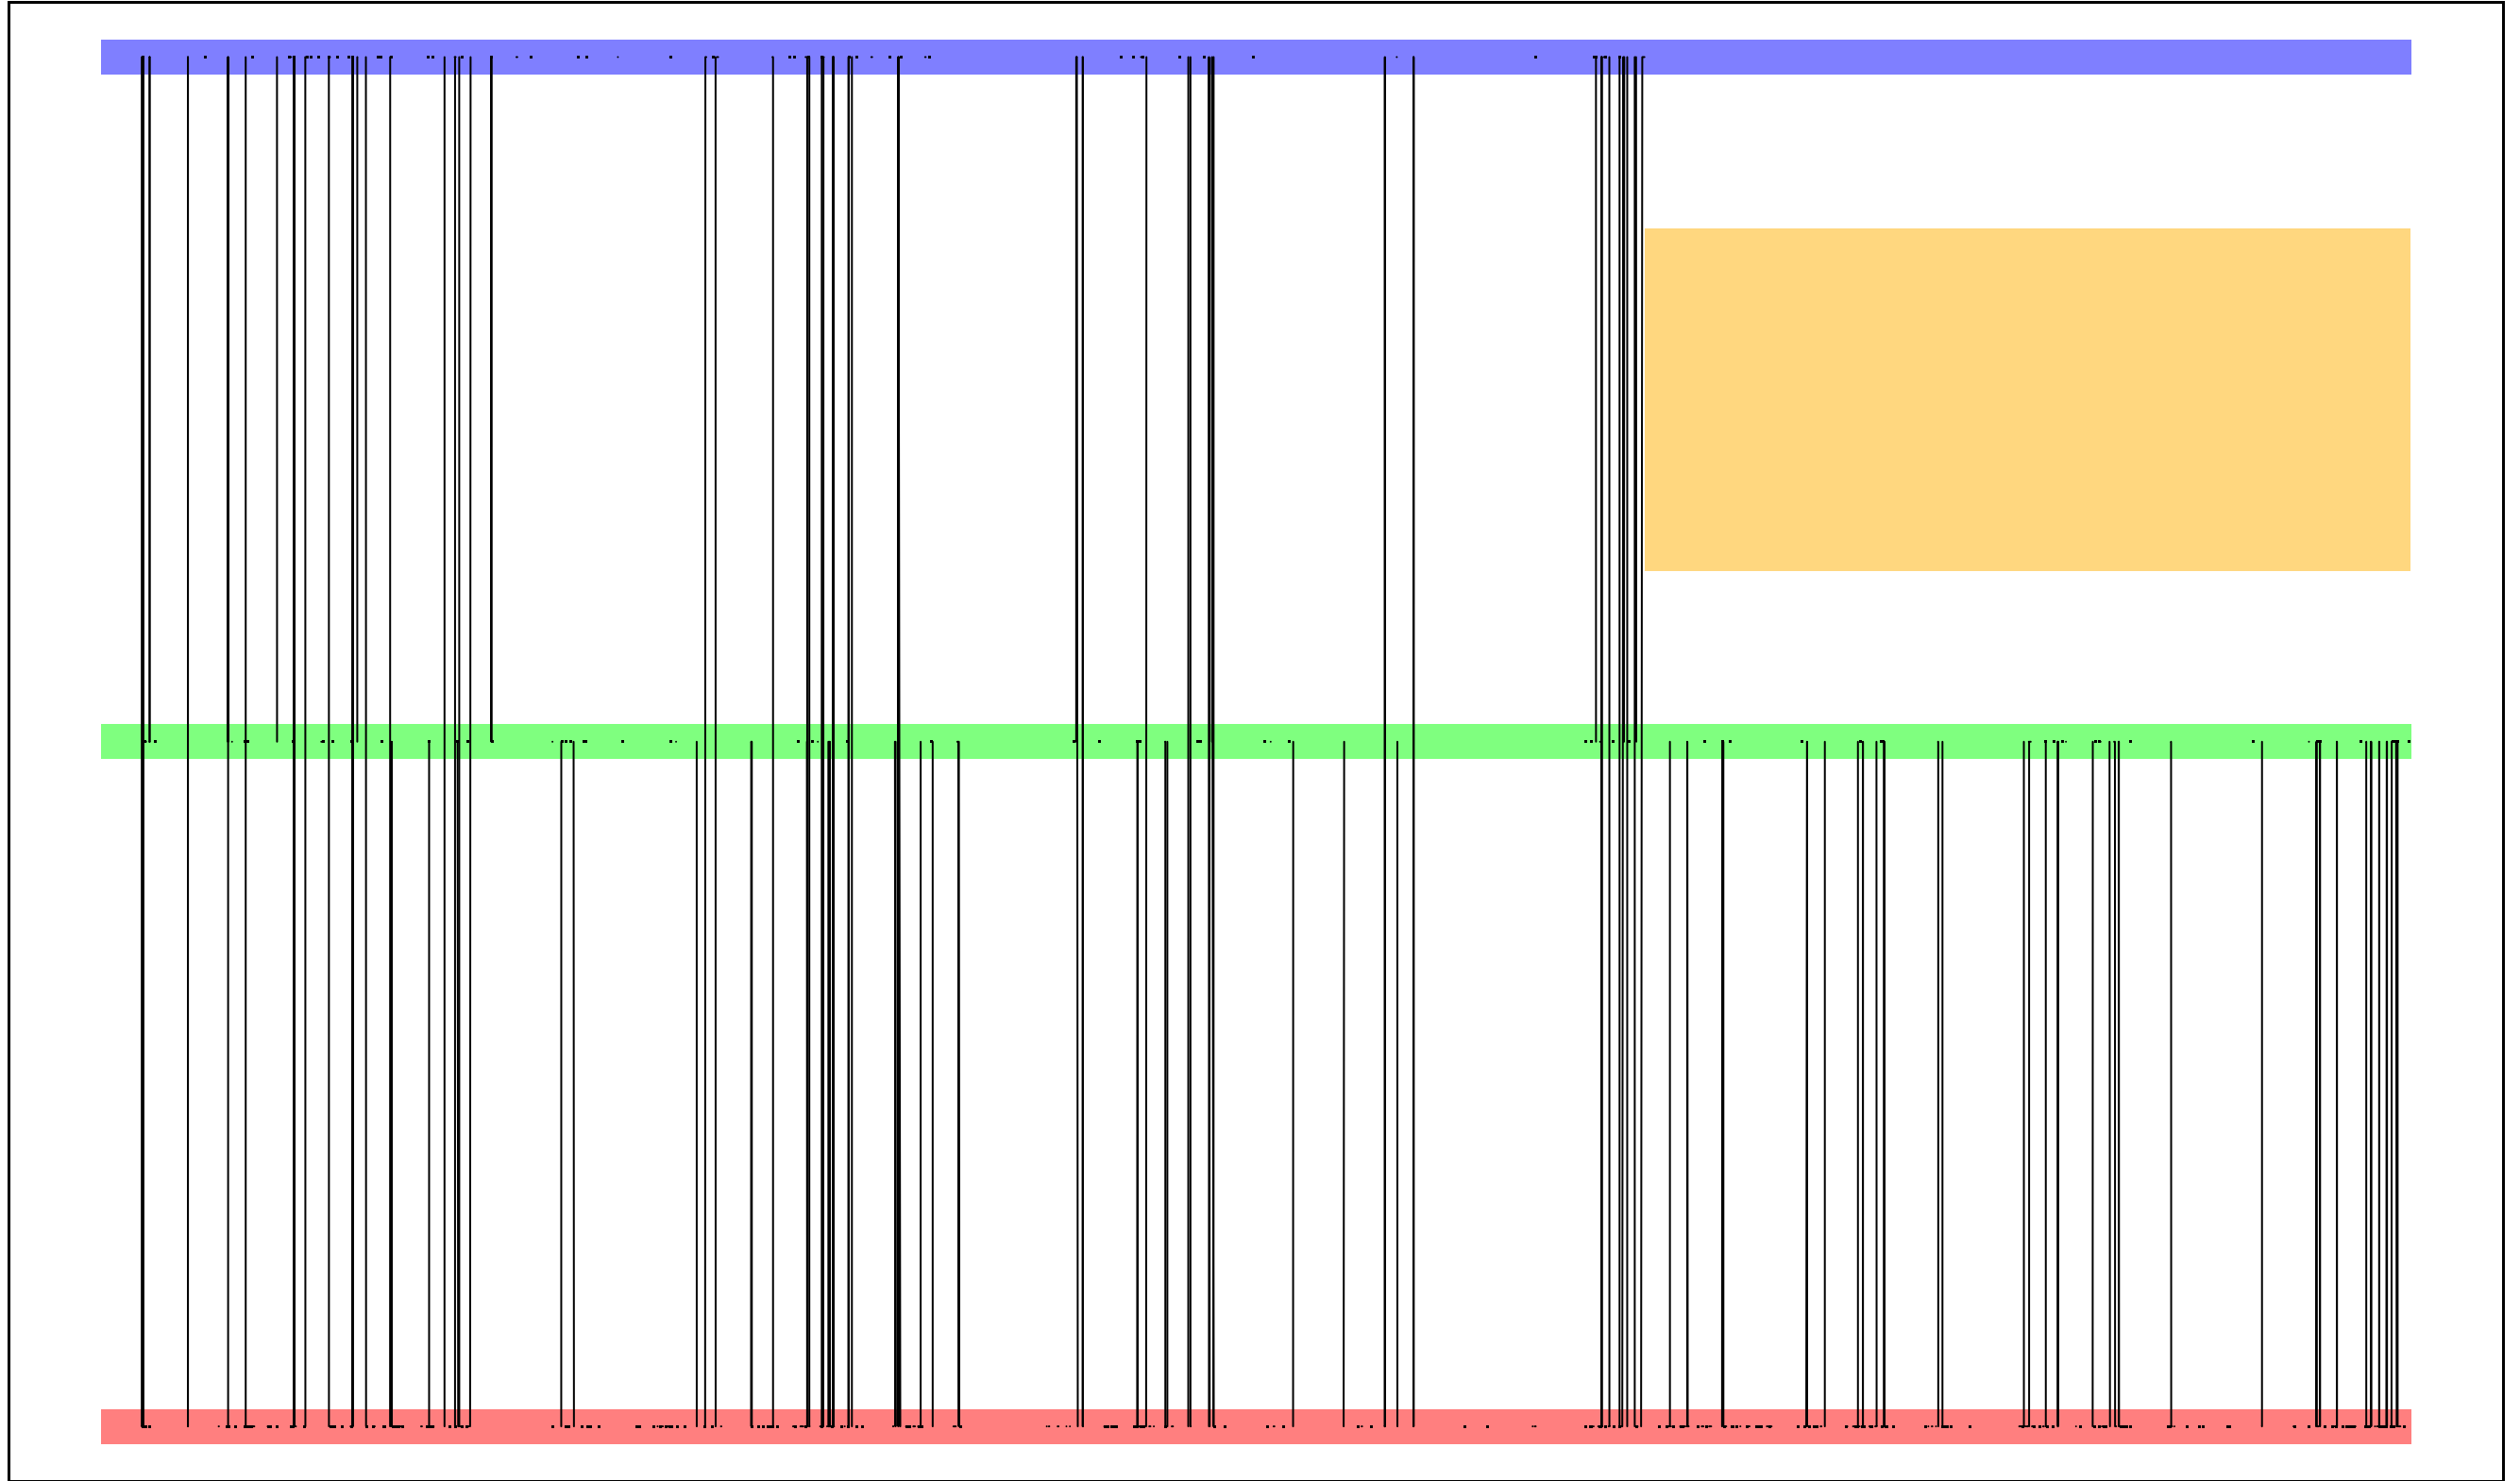

X Chromosome: Pos 1 – 154,899,846



2539-ZAL - 2540-SAL

DISCORDANT

CONCORDANT ALT

CONCORDANT REF

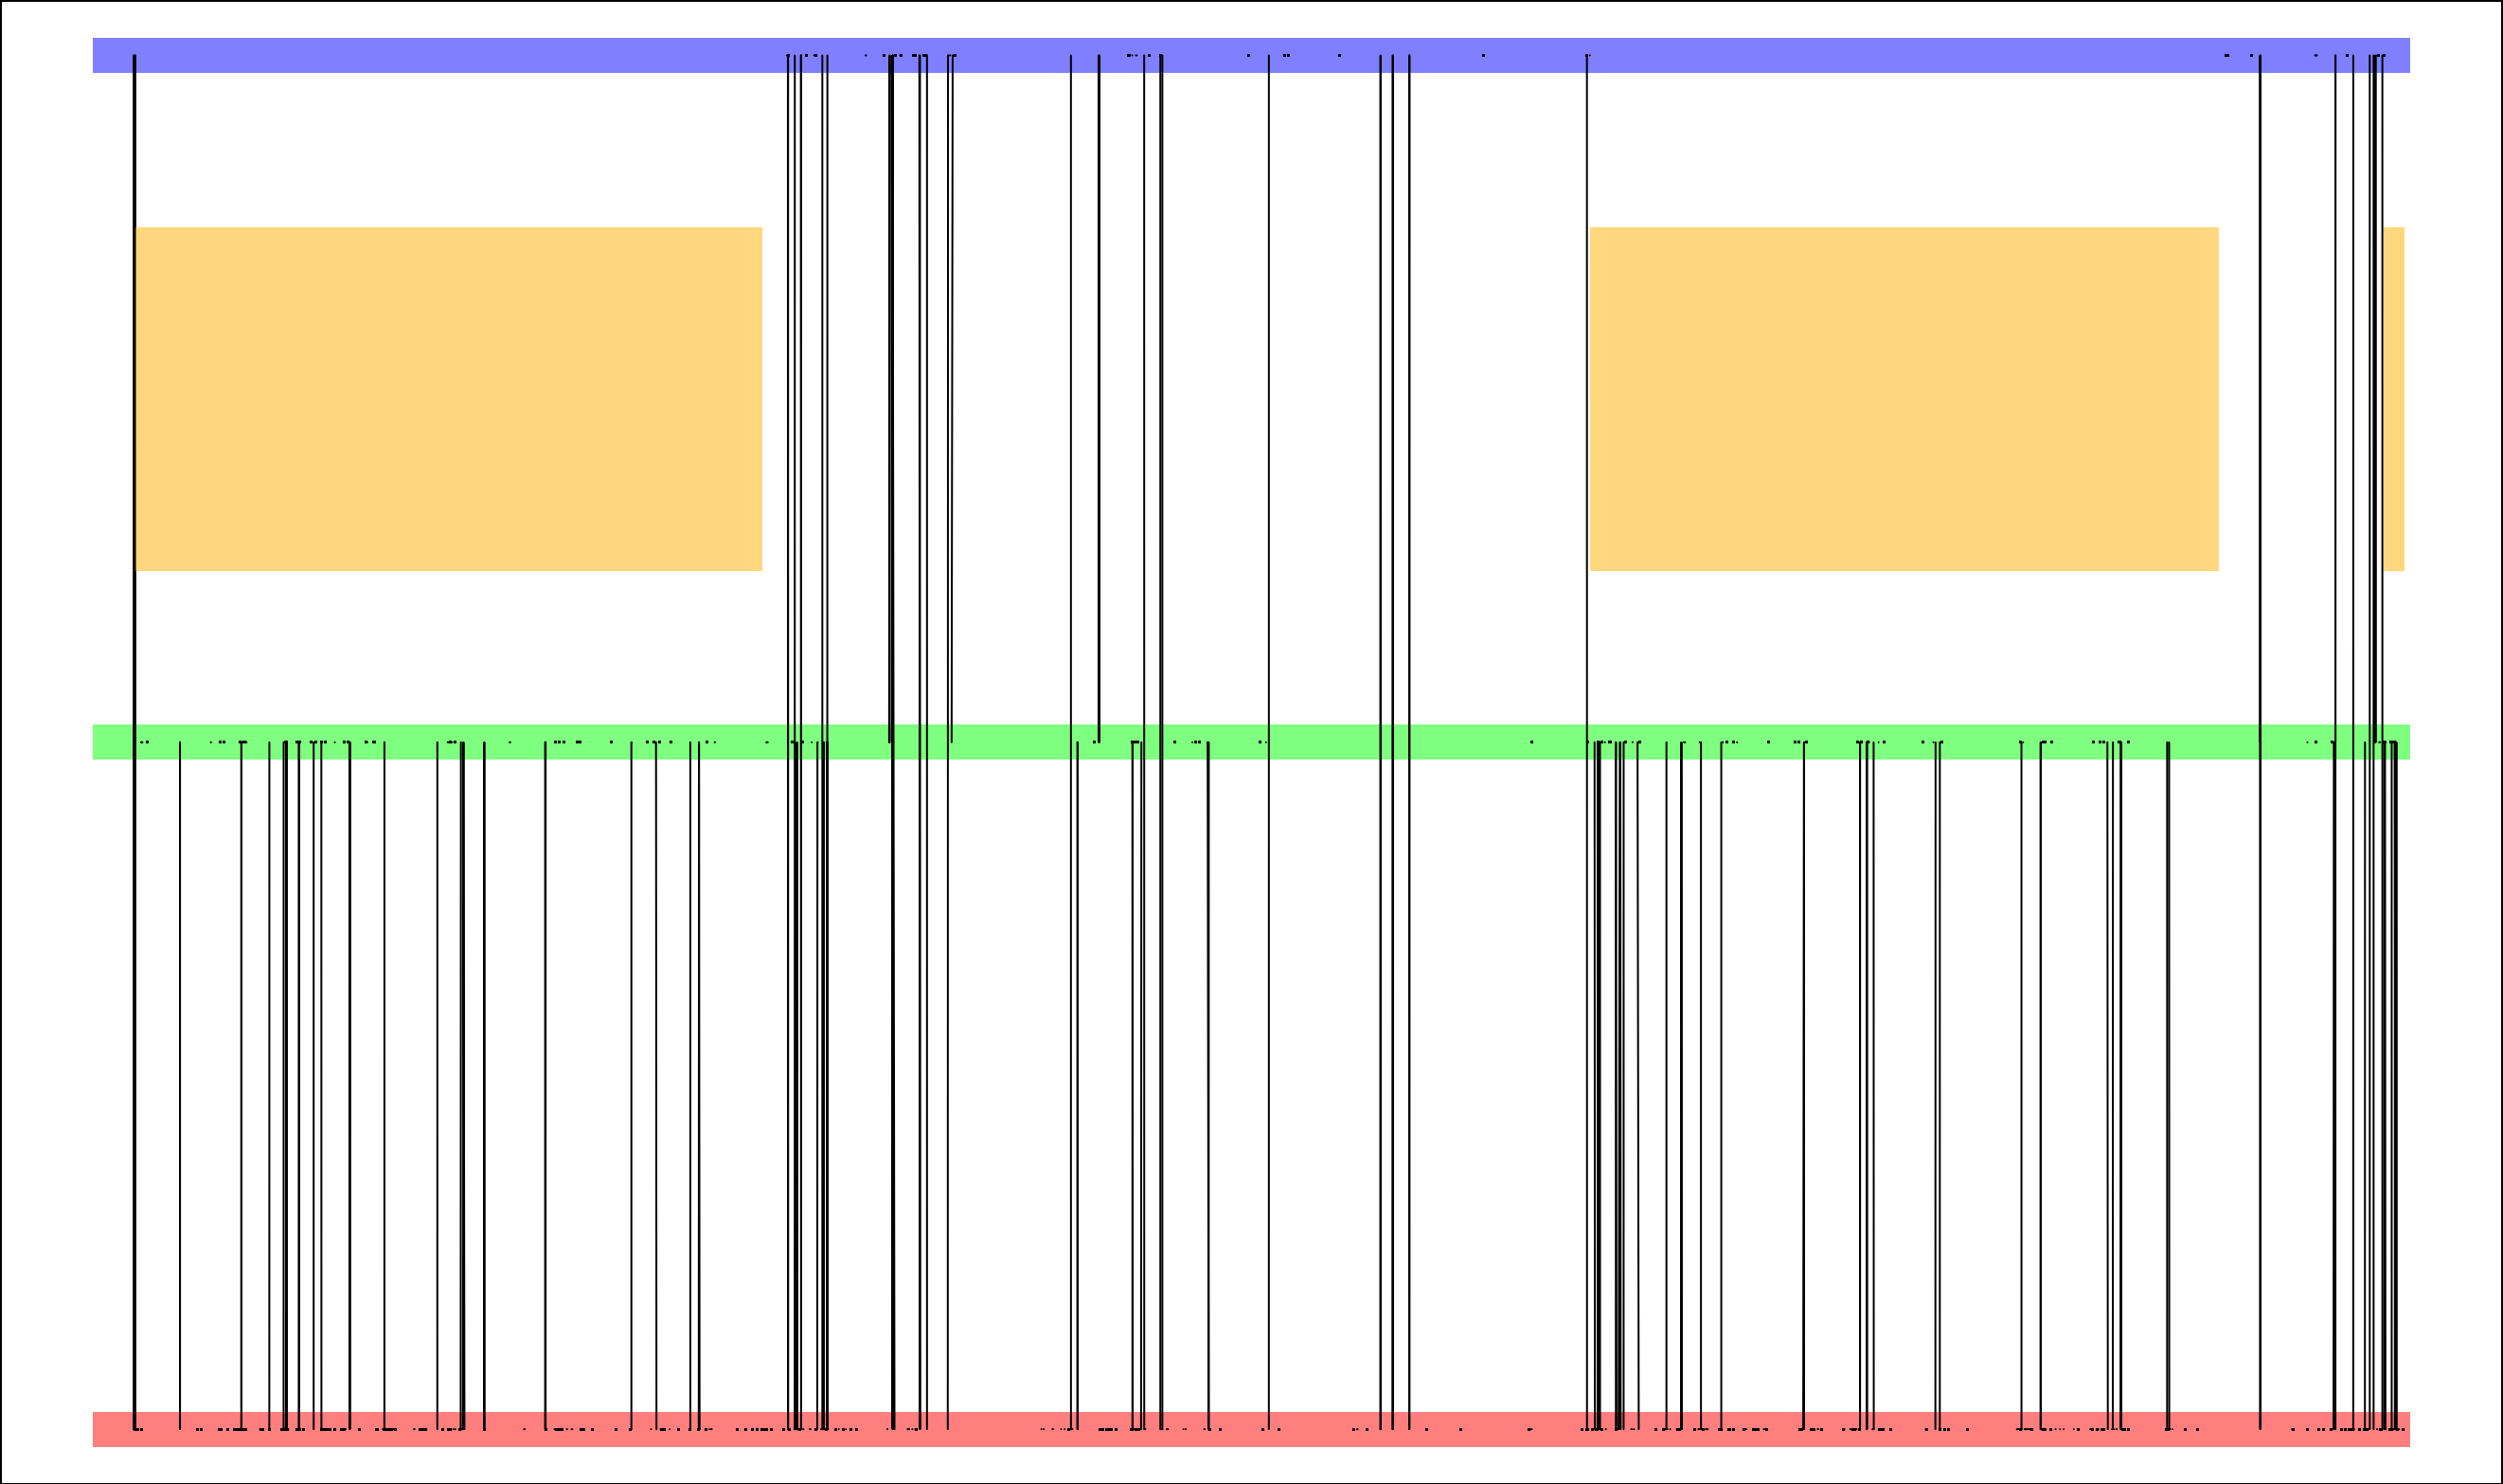

X Chromosome: Pos 1 - 154,899,846

Griffin-J - Griffin-R

DISCORDANT

CONCORDANT ALT

CONCORDANT REF

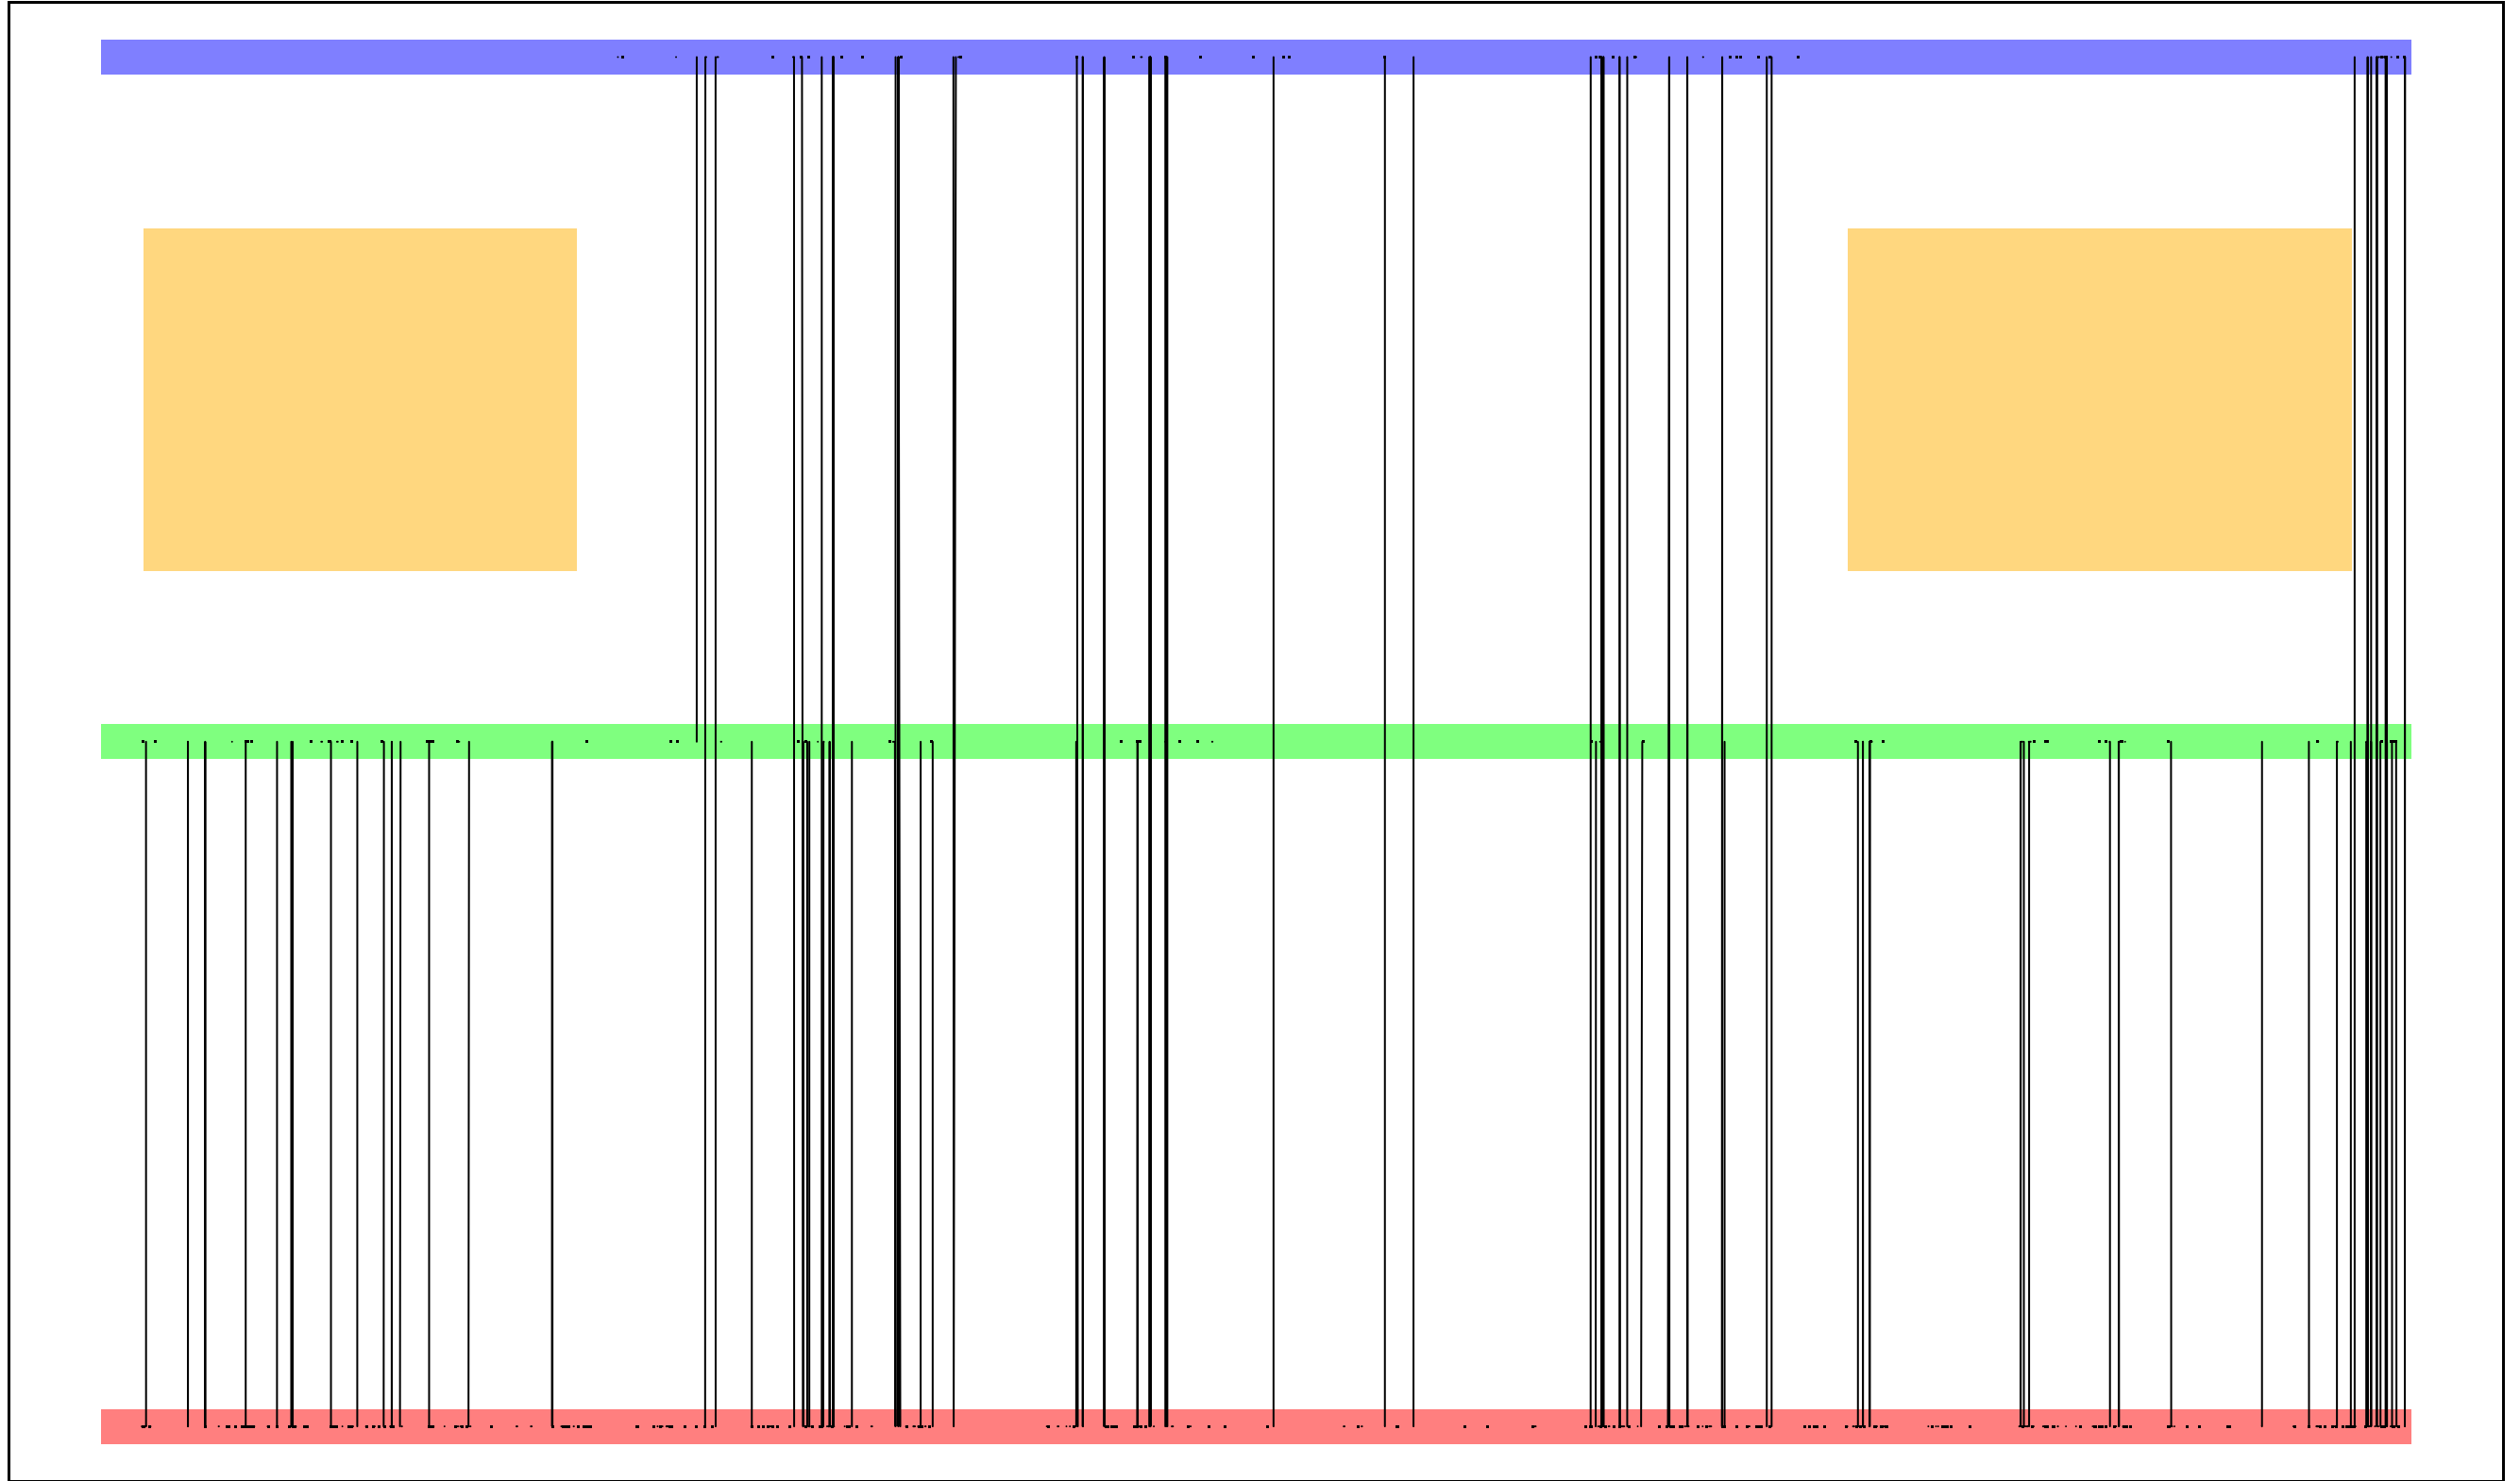

X Chromosome: Pos 1 - 154,899,846

cms9228 – cms9483

DISCORDANT

CONCORDANT ALT

CONCORDANT REF

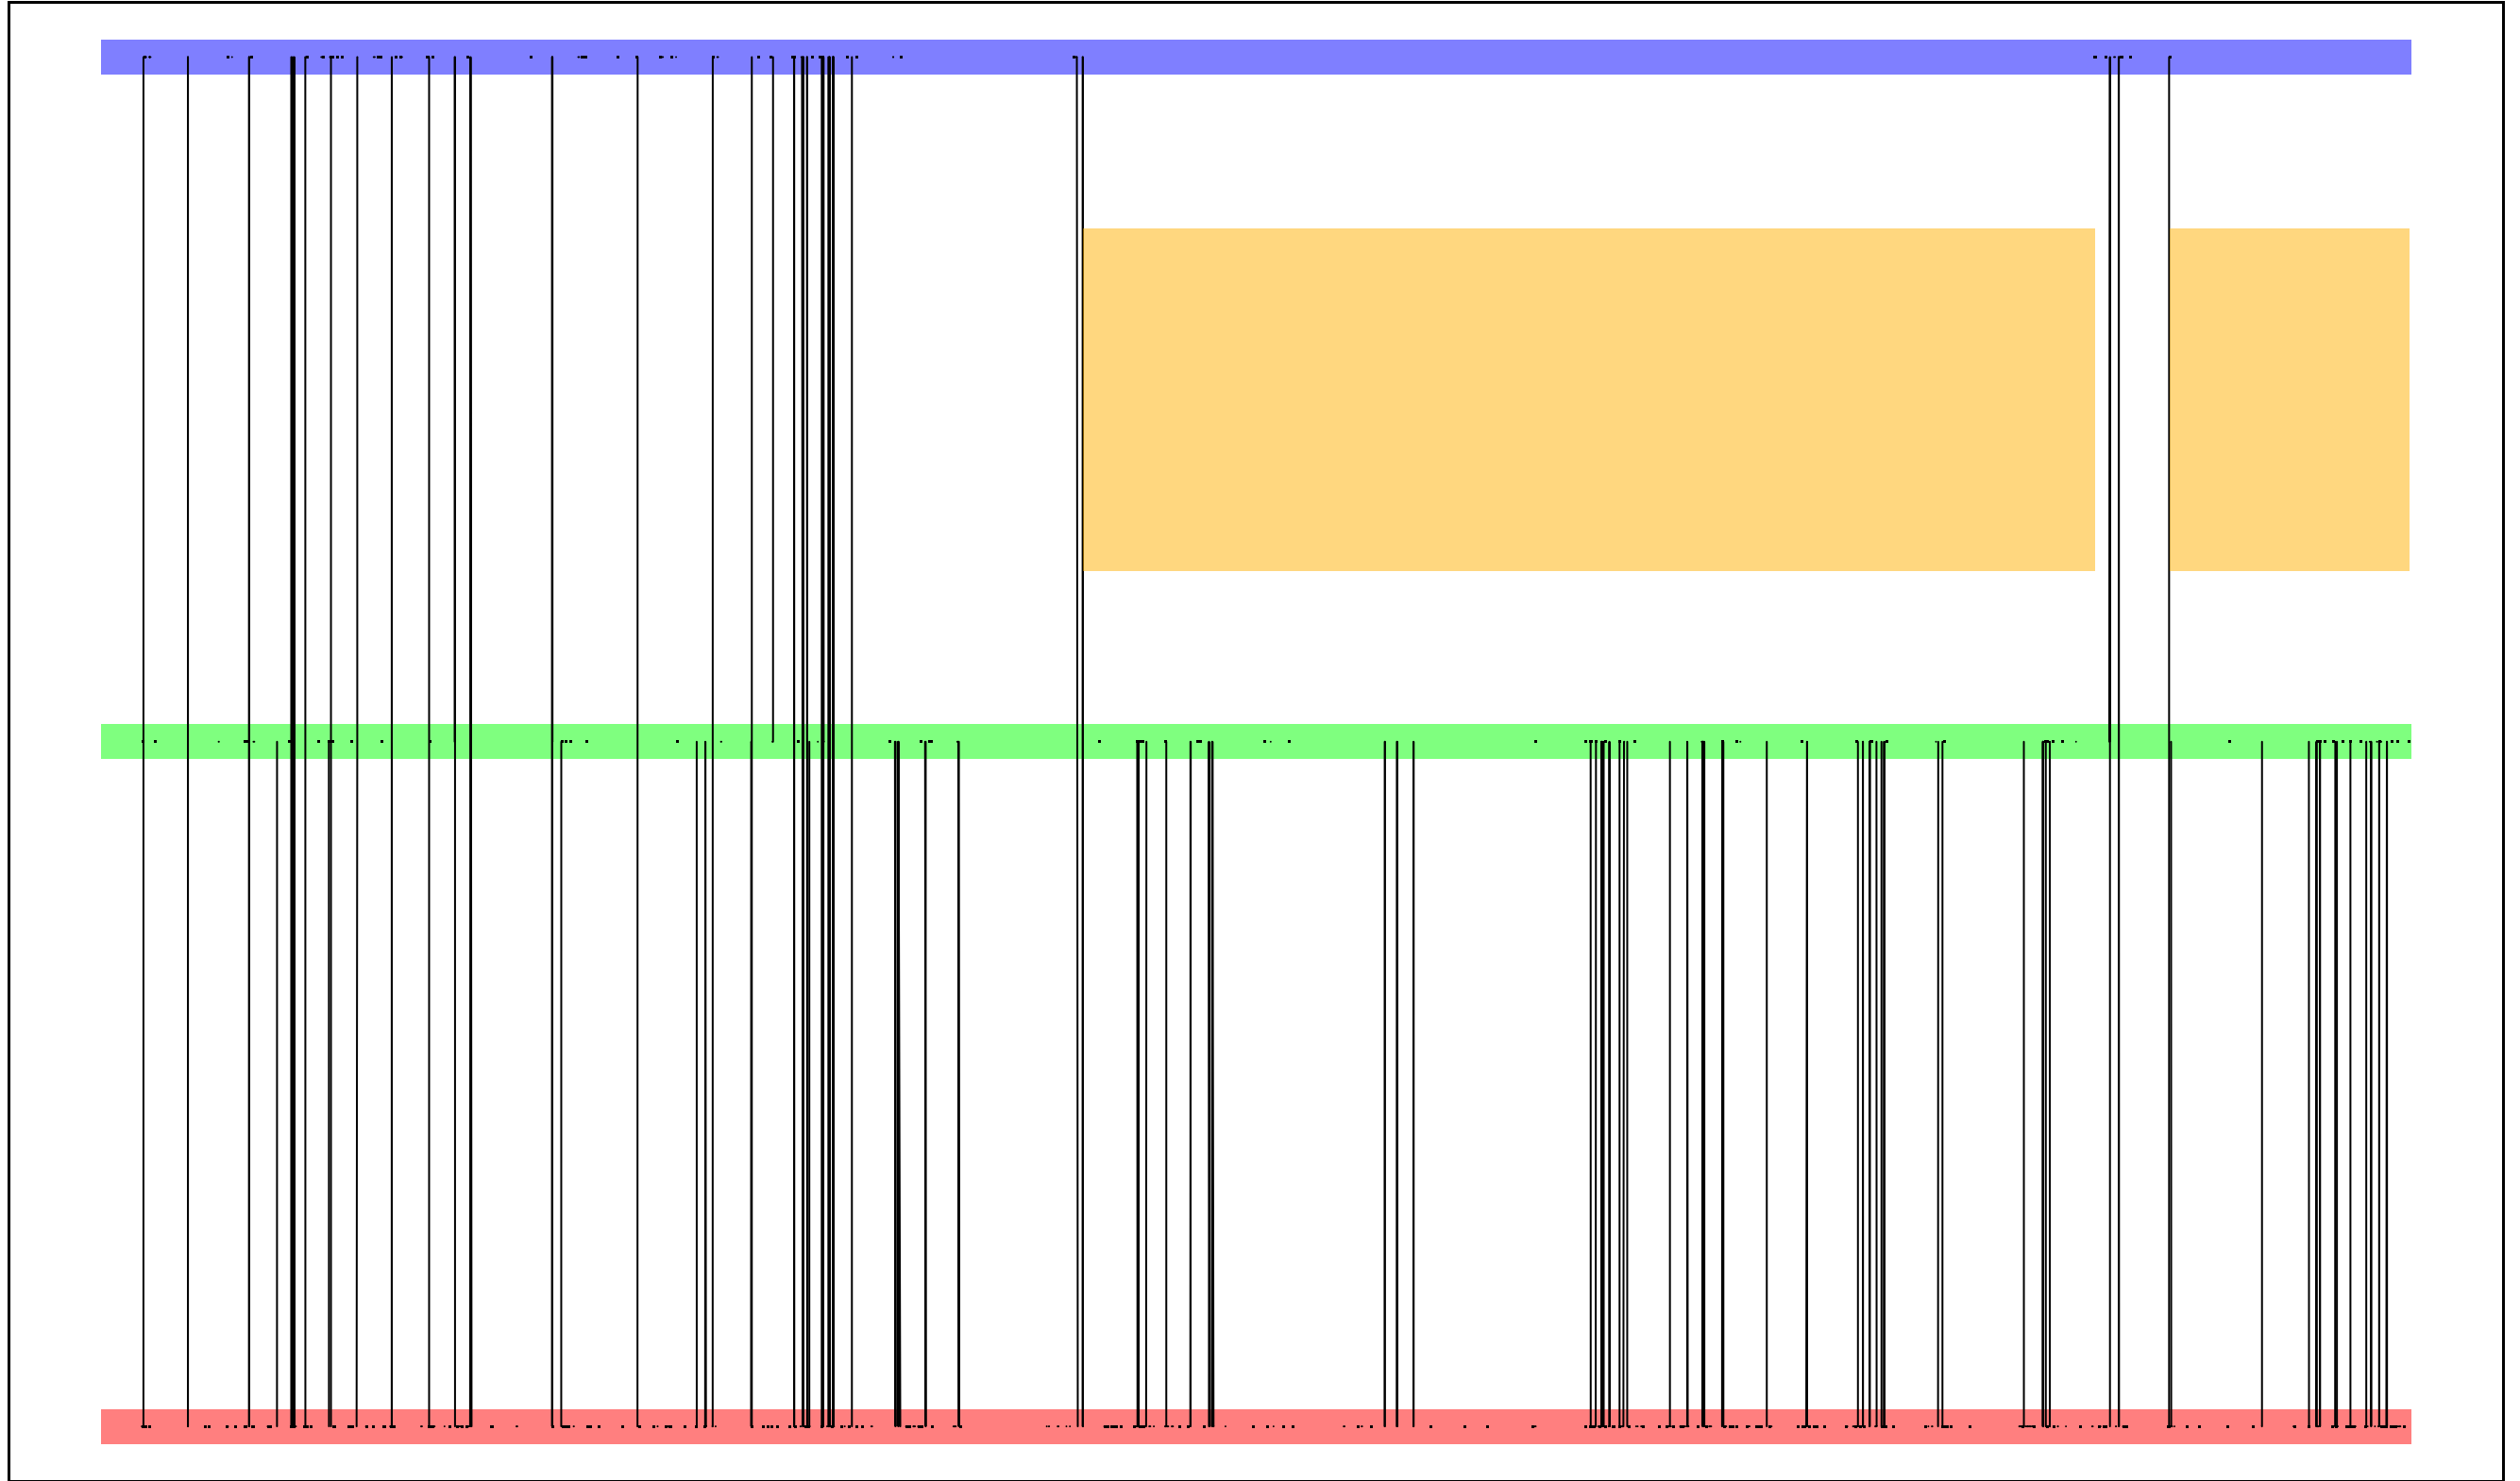

X Chromosome: Pos 1 – 154,899,846

cms11961 – cms11962

DISCORDANT

CONCORDANT ALT

CONCORDANT REF

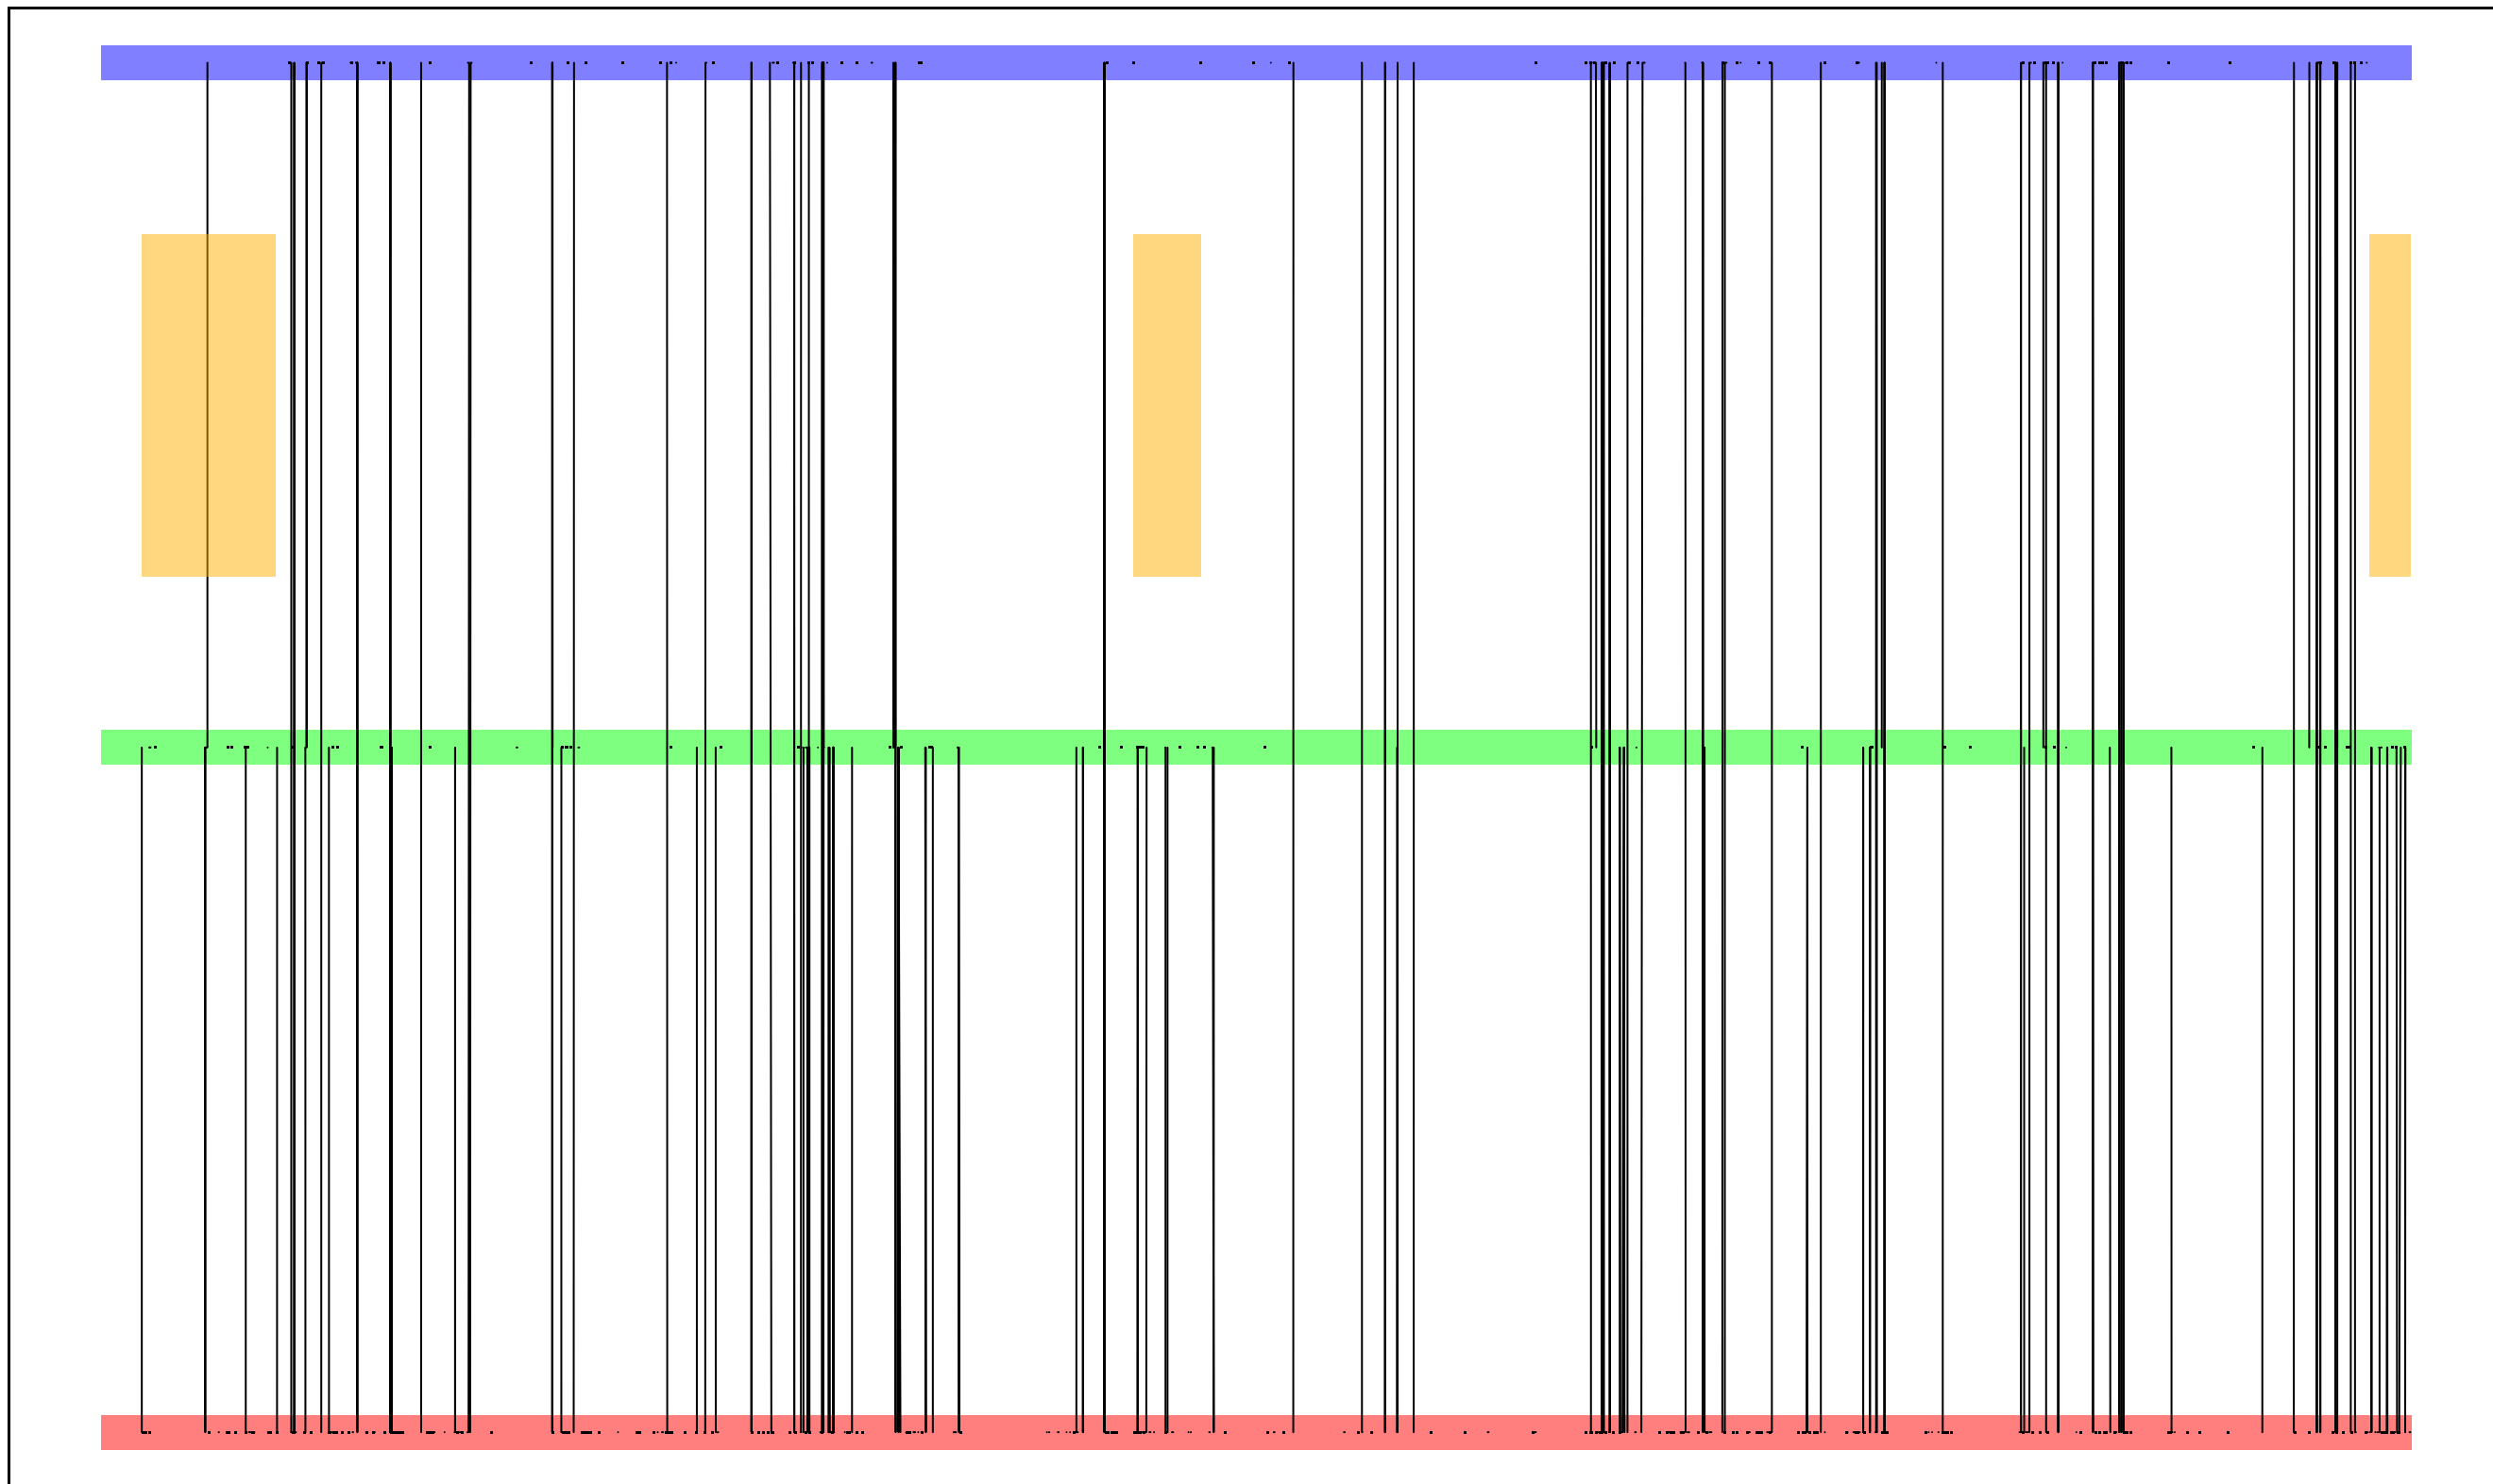

X Chromosome: Pos 1 – 154,899,846

cms13173 – cms13174

DISCORDANT

CONCORDANT ALT

CONCORDANT REF

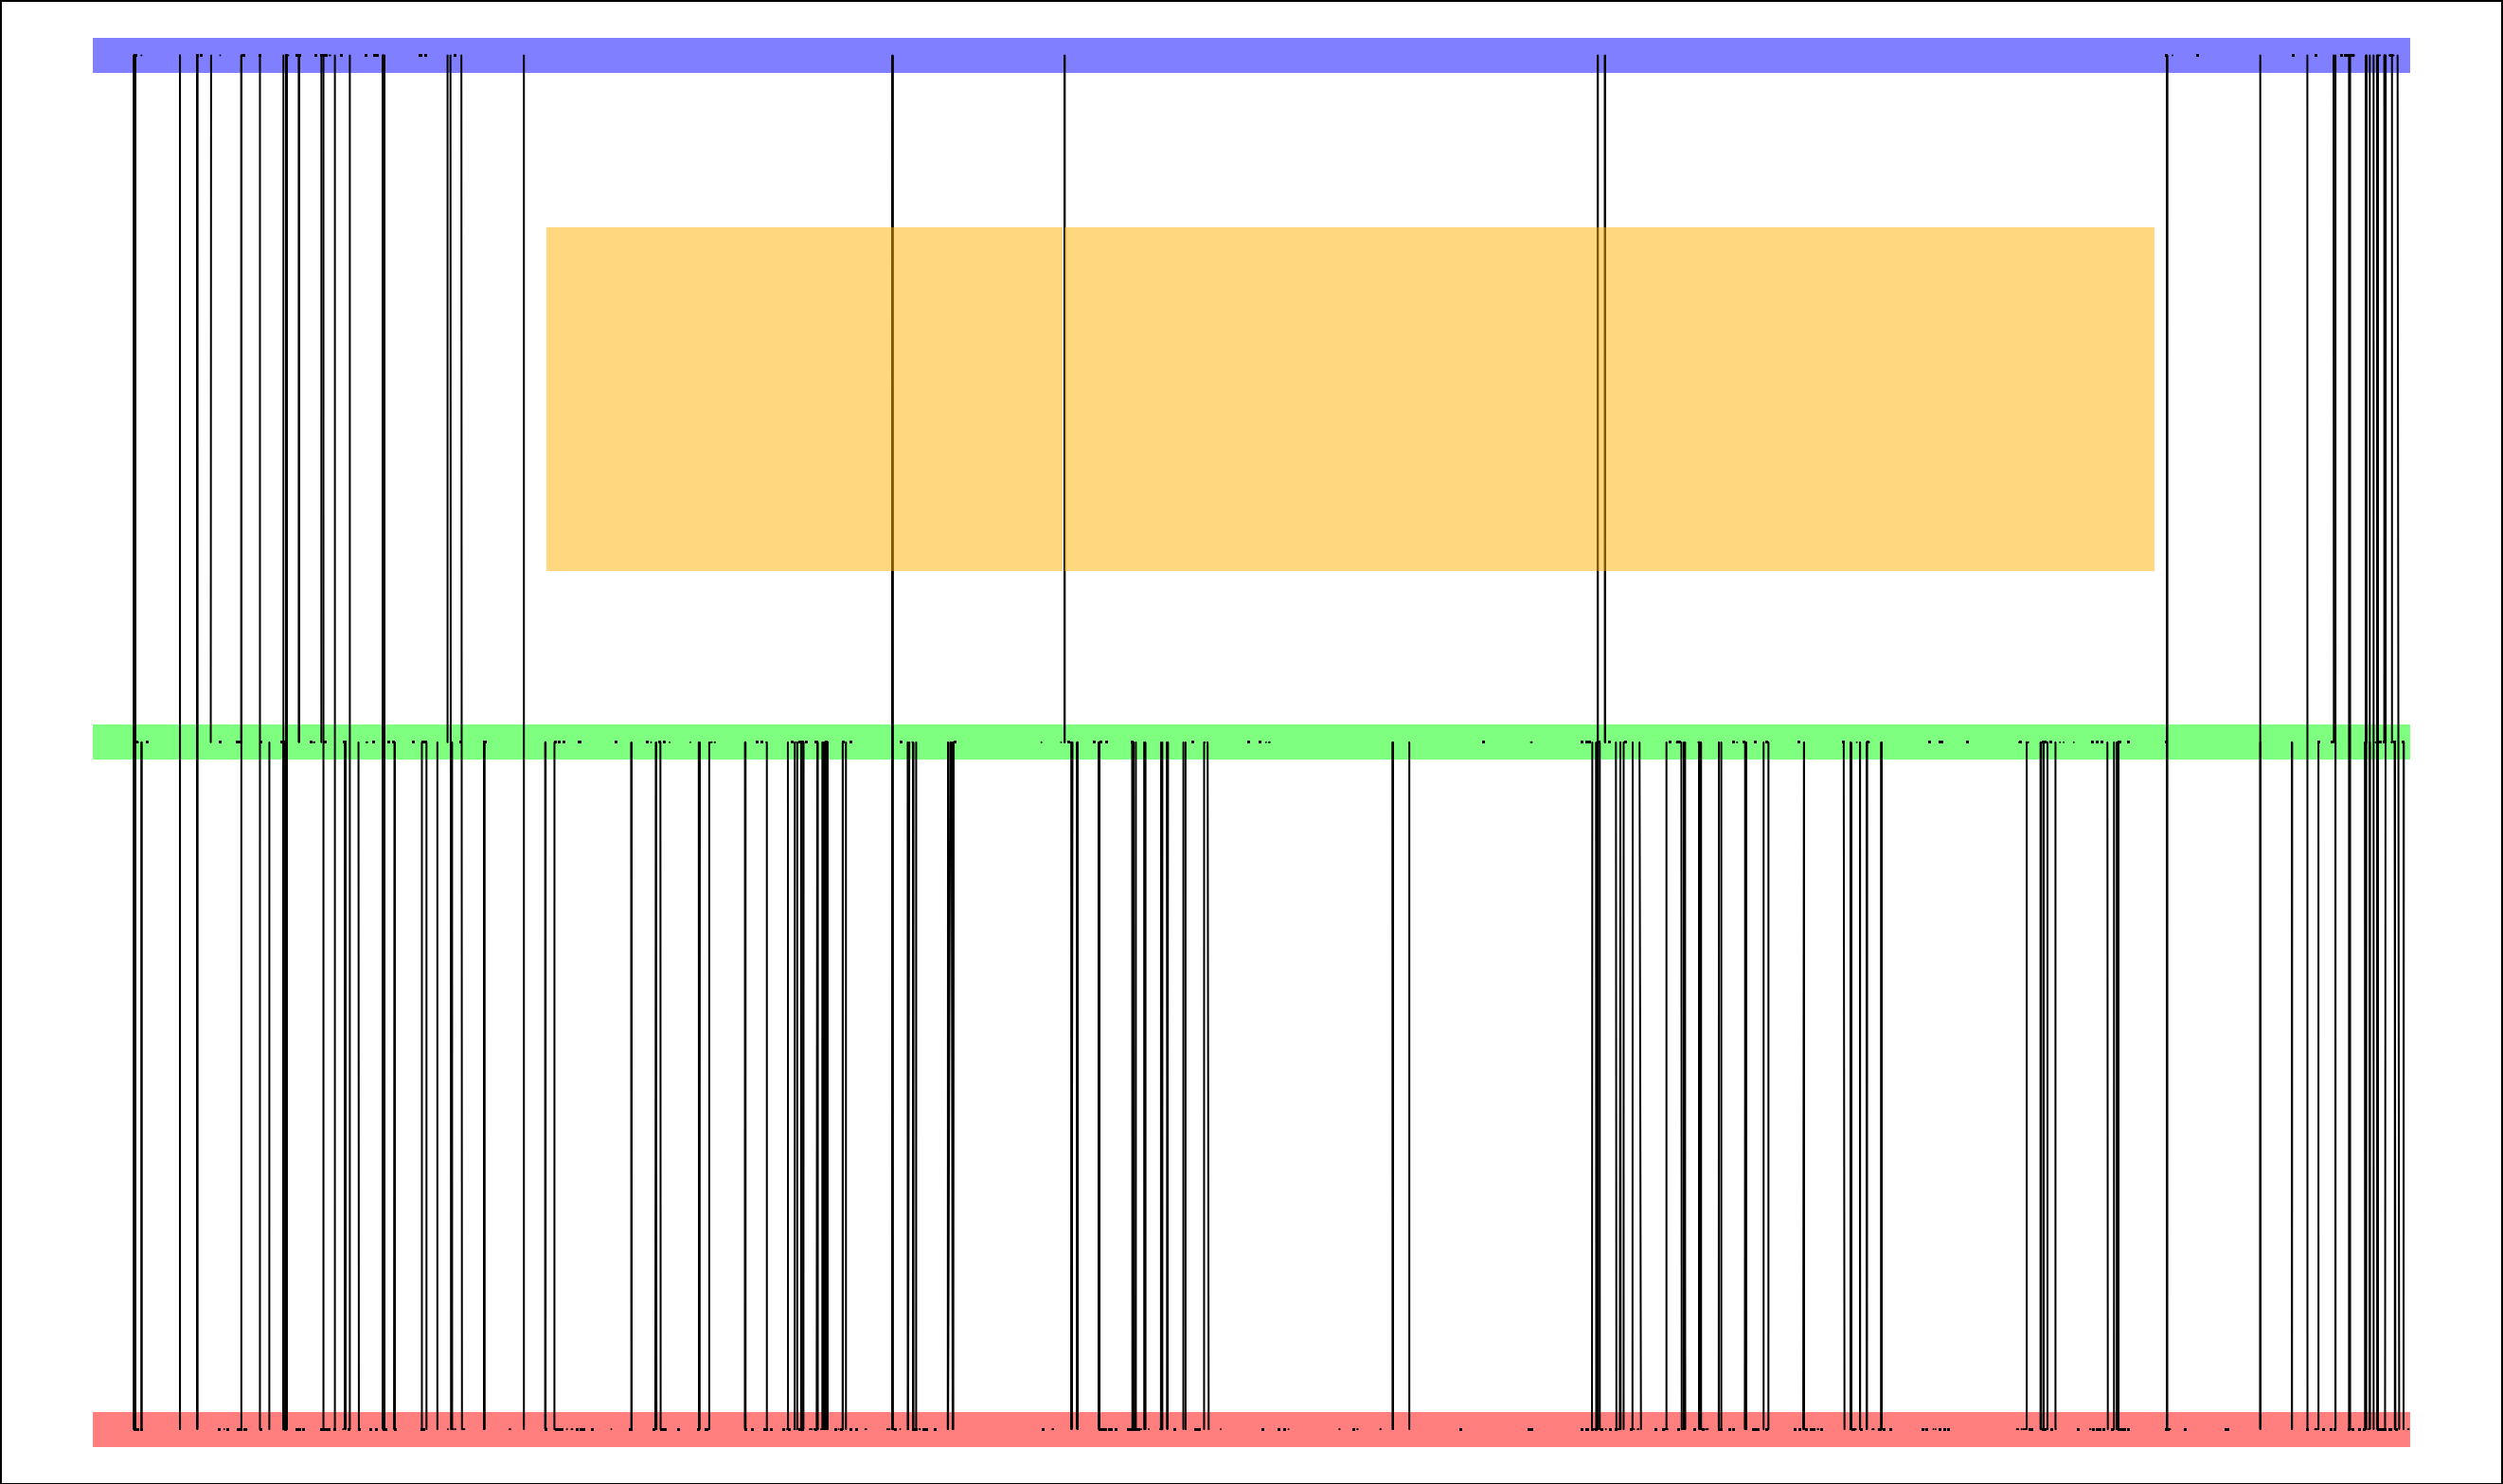

X Chromosome: Pos 1 – 154,899,846

cms13303 – cms13979

DISCORDANT

CONCORDANT ALT

CONCORDANT REF

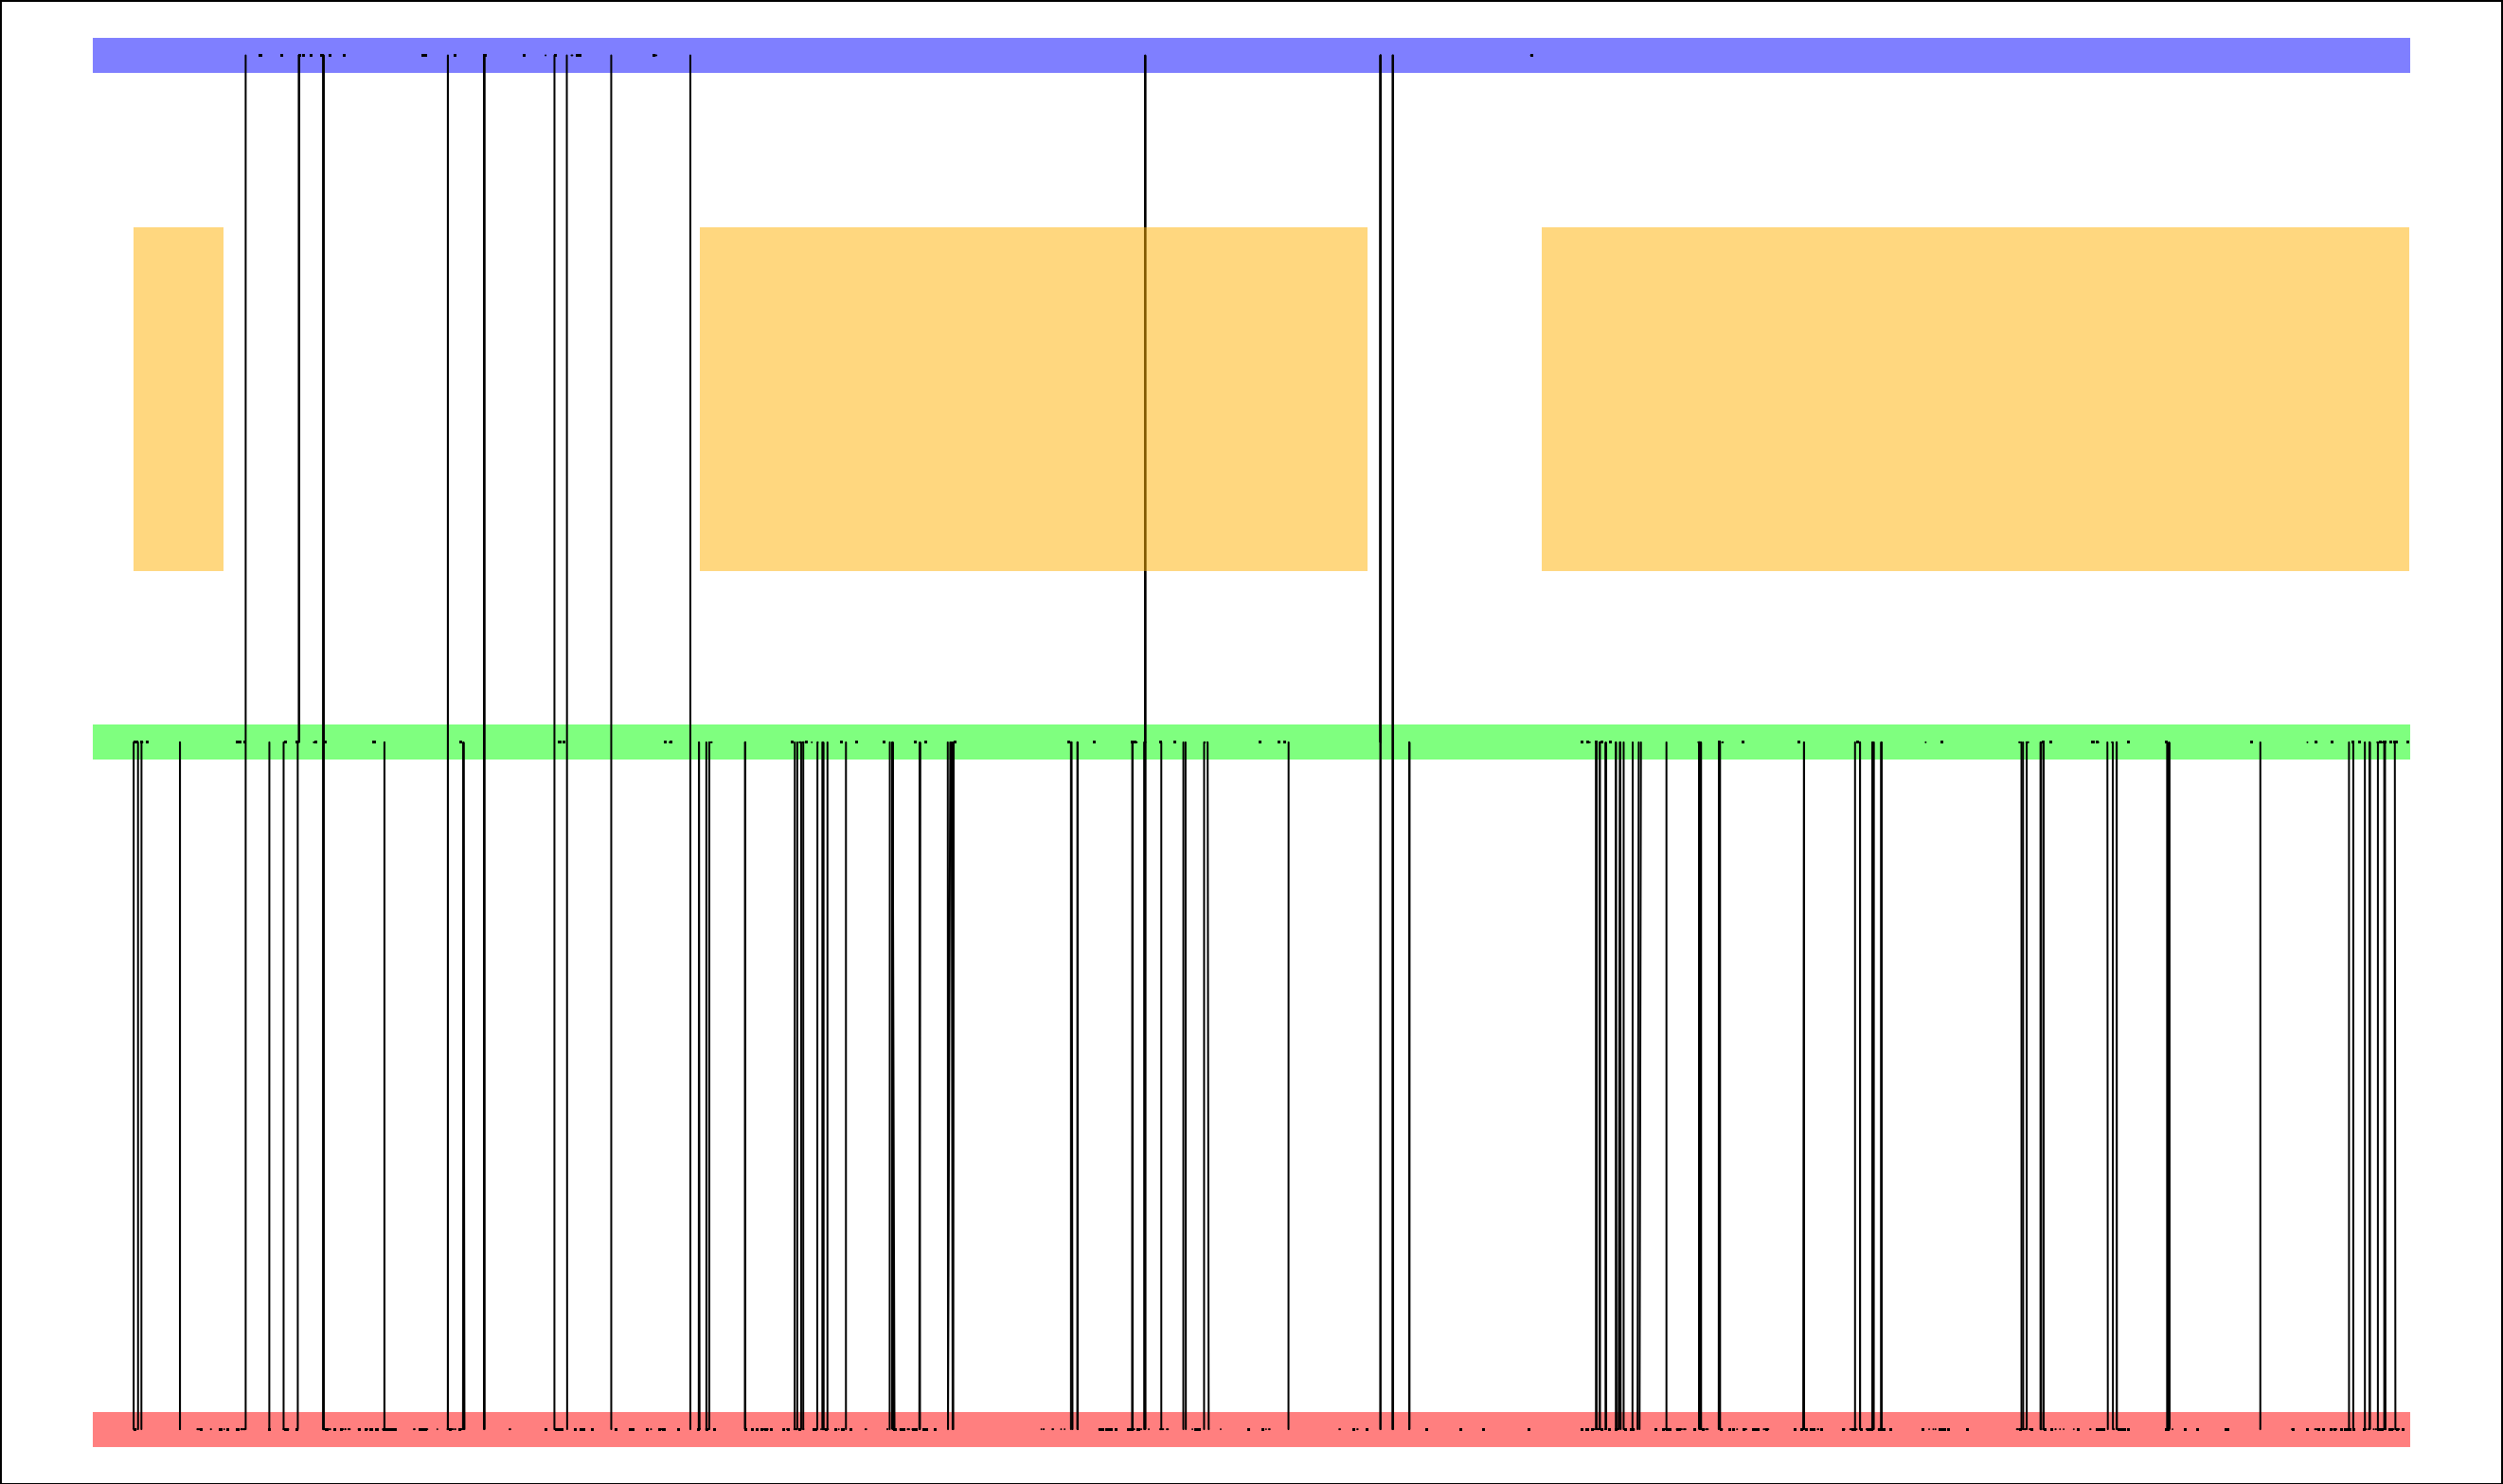

X Chromosome: Pos 1 – 154,899,846

cms2788 – cms2789

DISCORDANT

CONCORDANT ALT

CONCORDANT REF

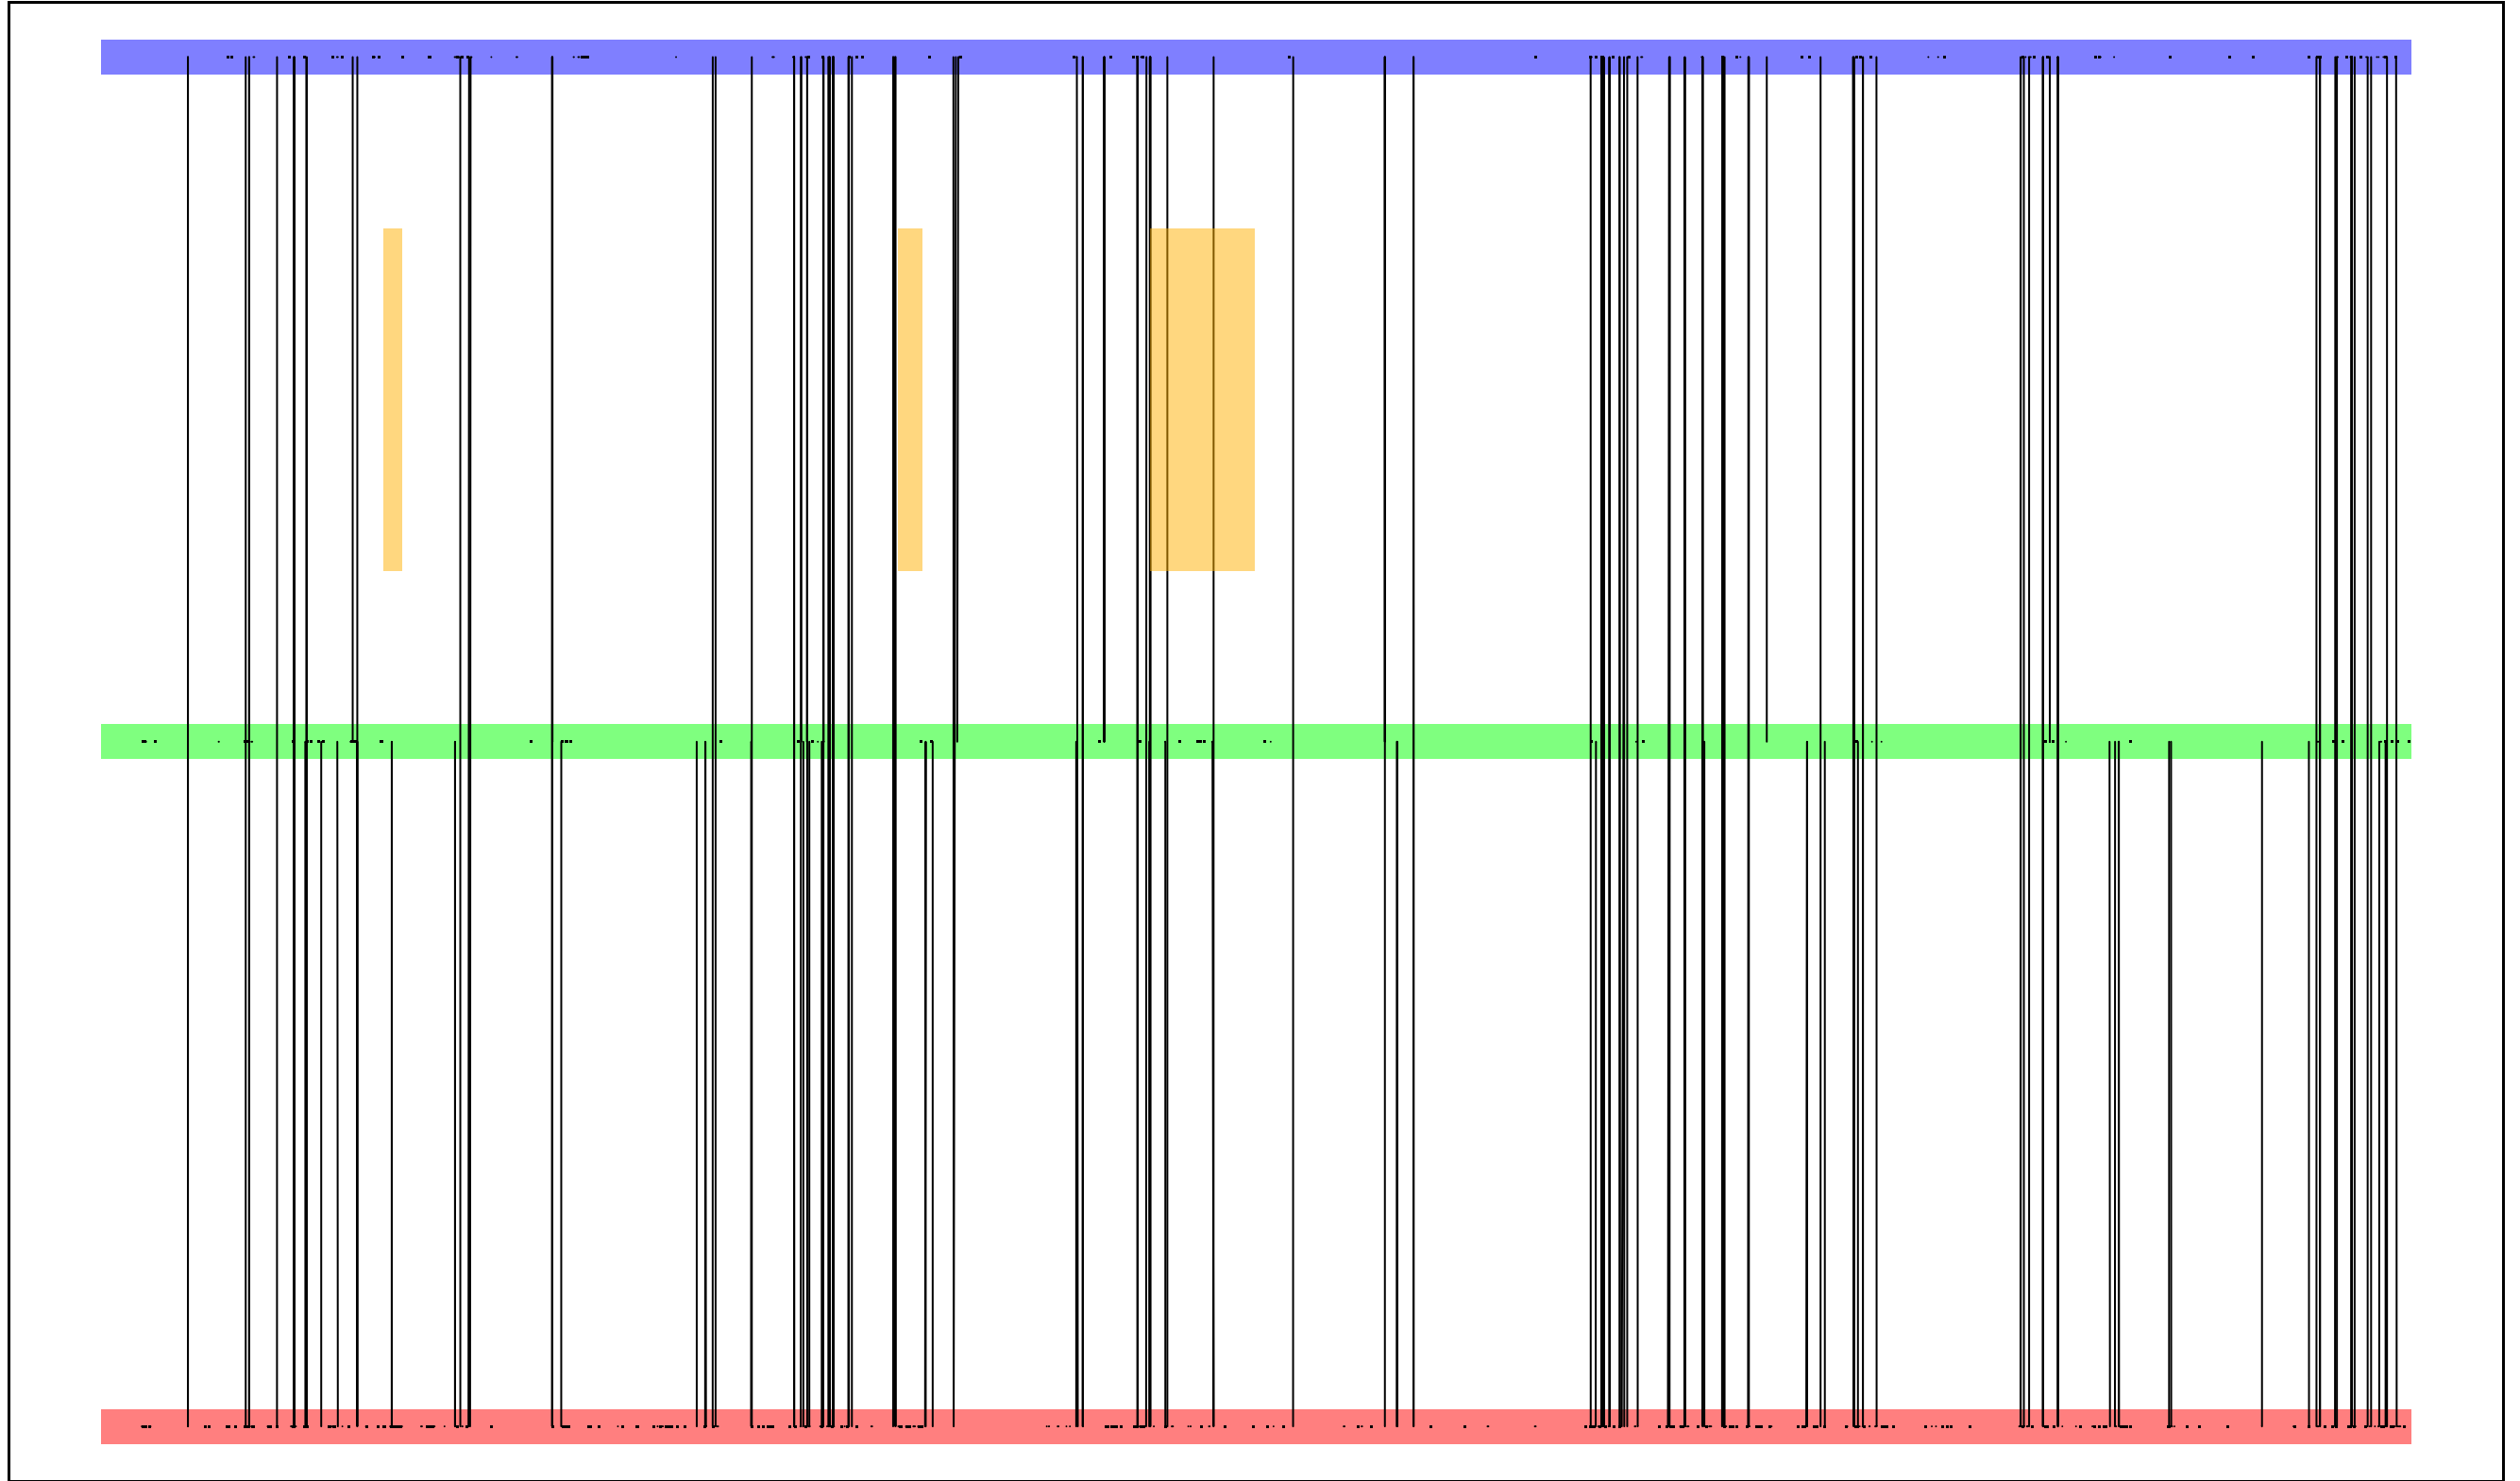

X Chromosome: Pos 1 – 154,899,846

cms17118 – cms18212

DISCORDANT

CONCORDANT ALT

CONCORDANT REF

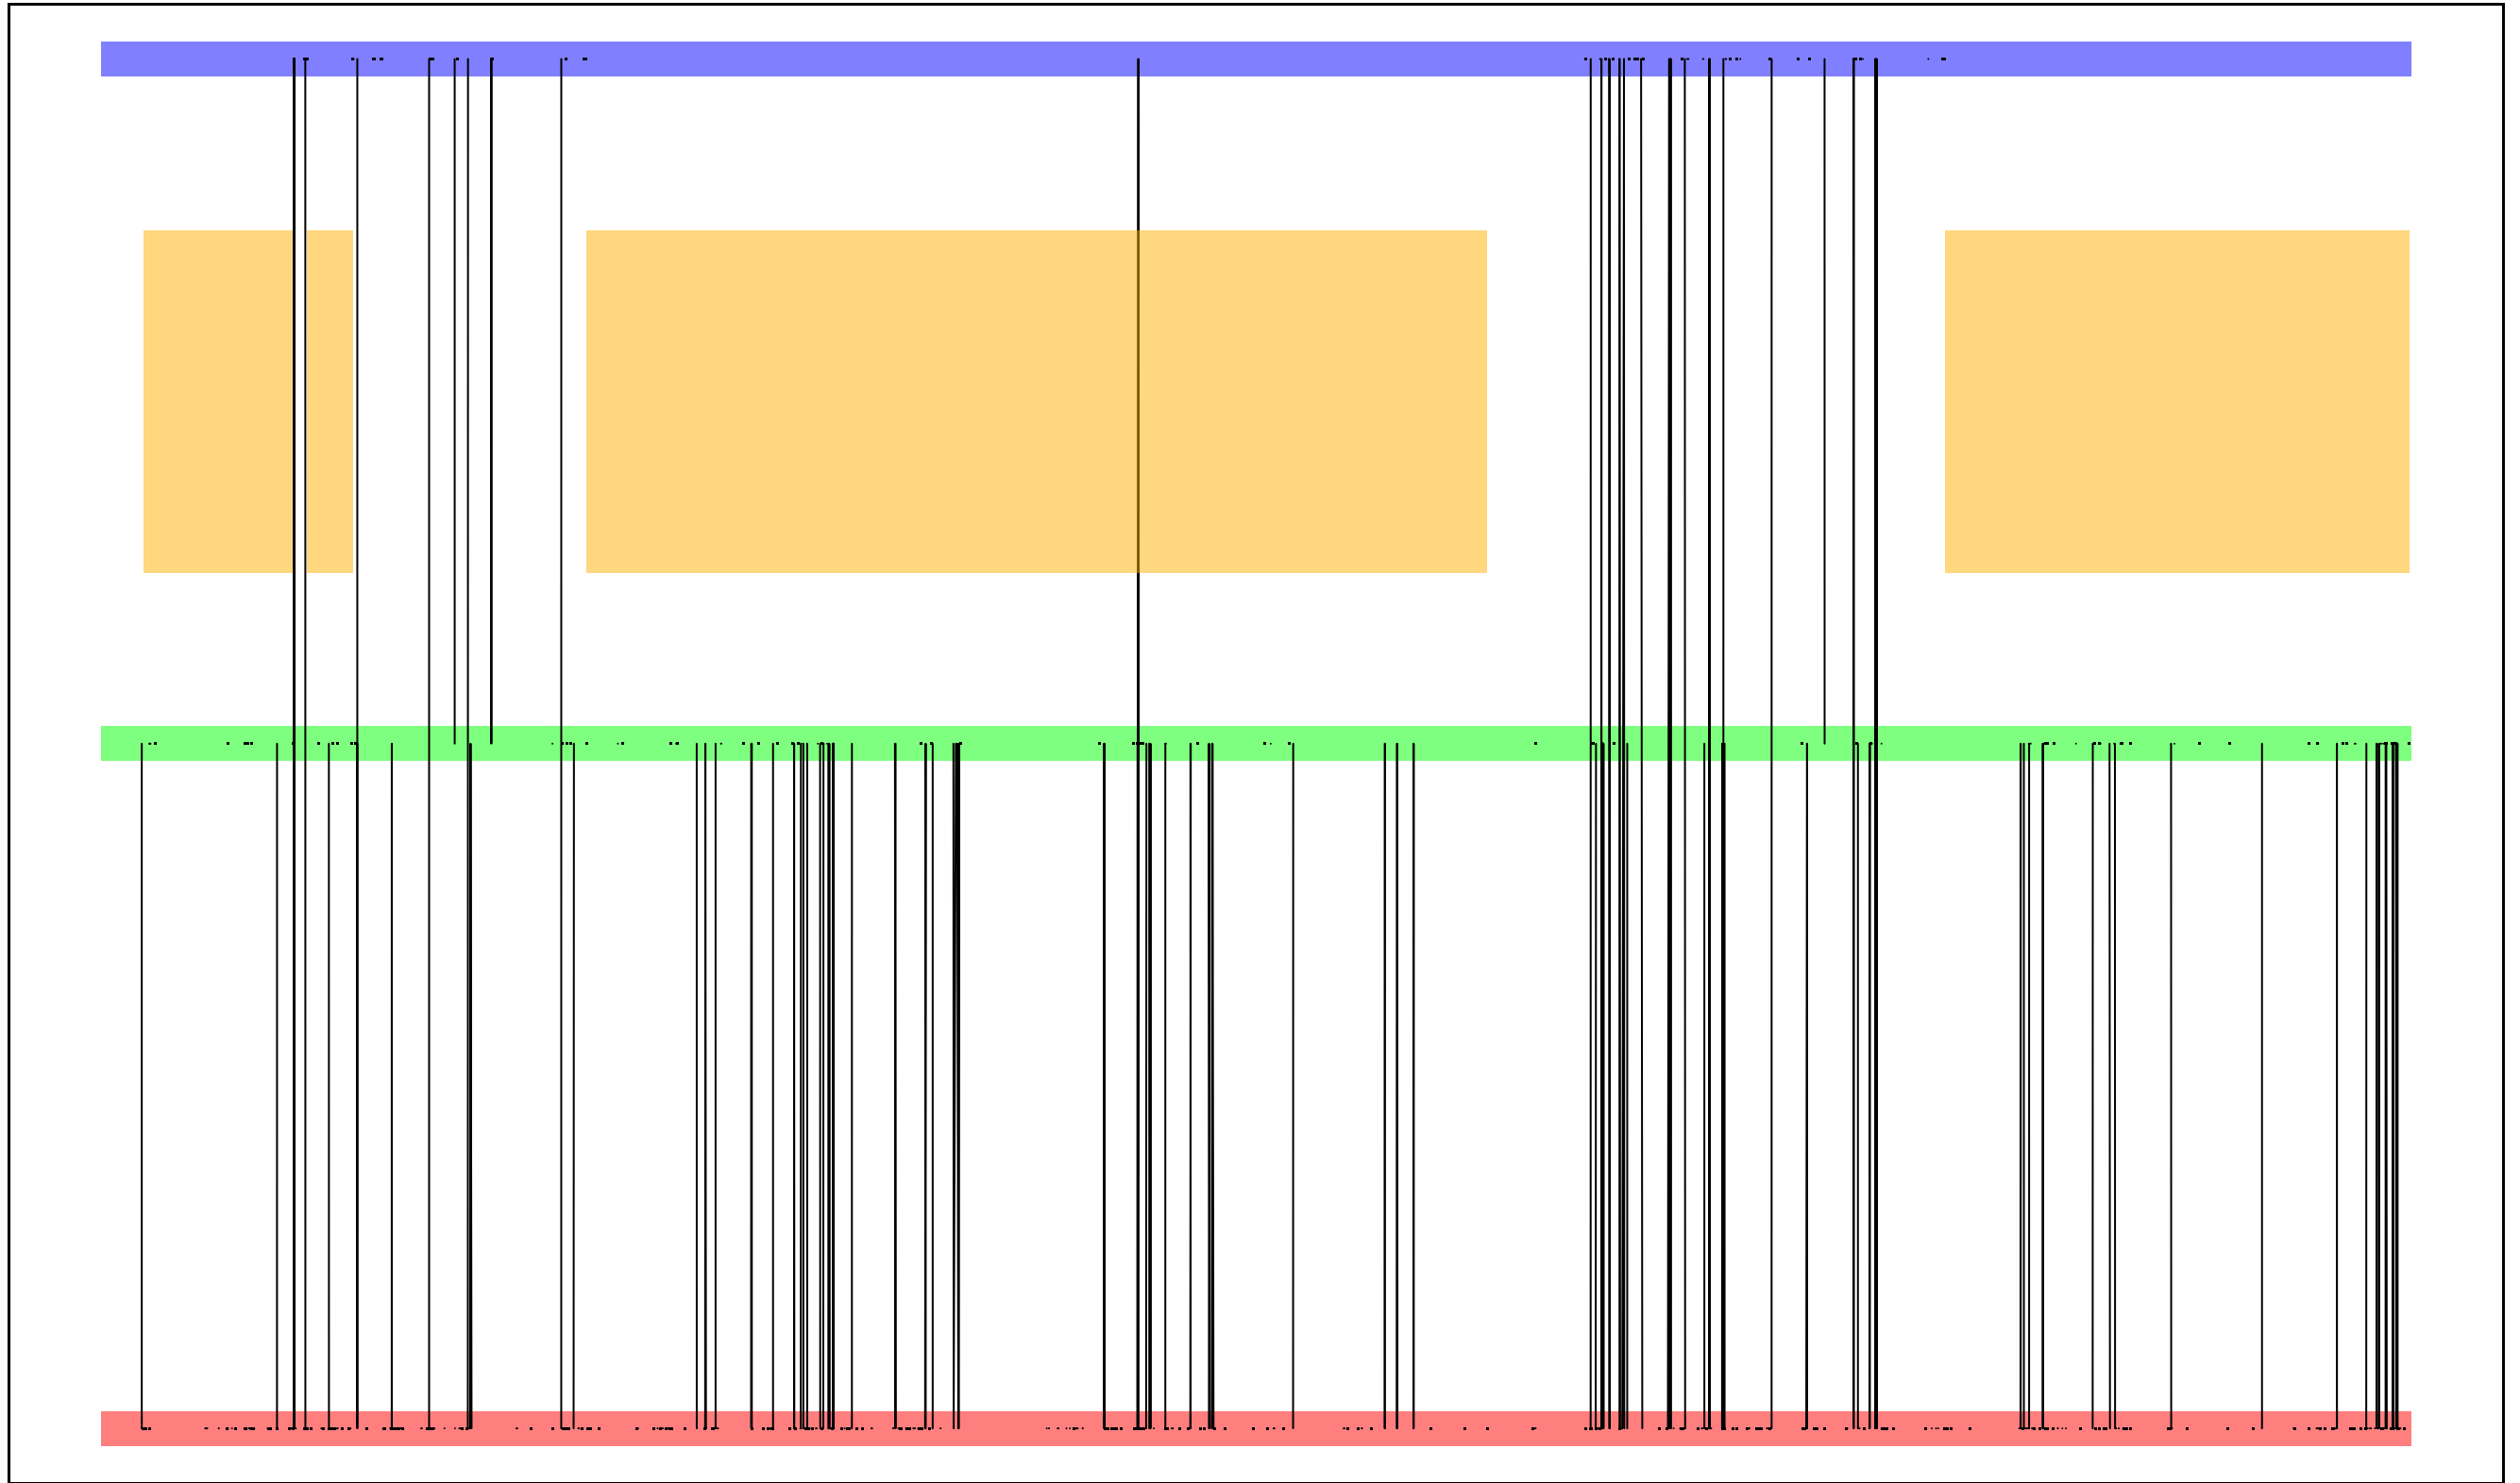

X Chromosome: Pos 1 – 154,899,846



CMS19847 – CMS19849

DISCORDANT

CONCORDANT ALT

CONCORDANT REF

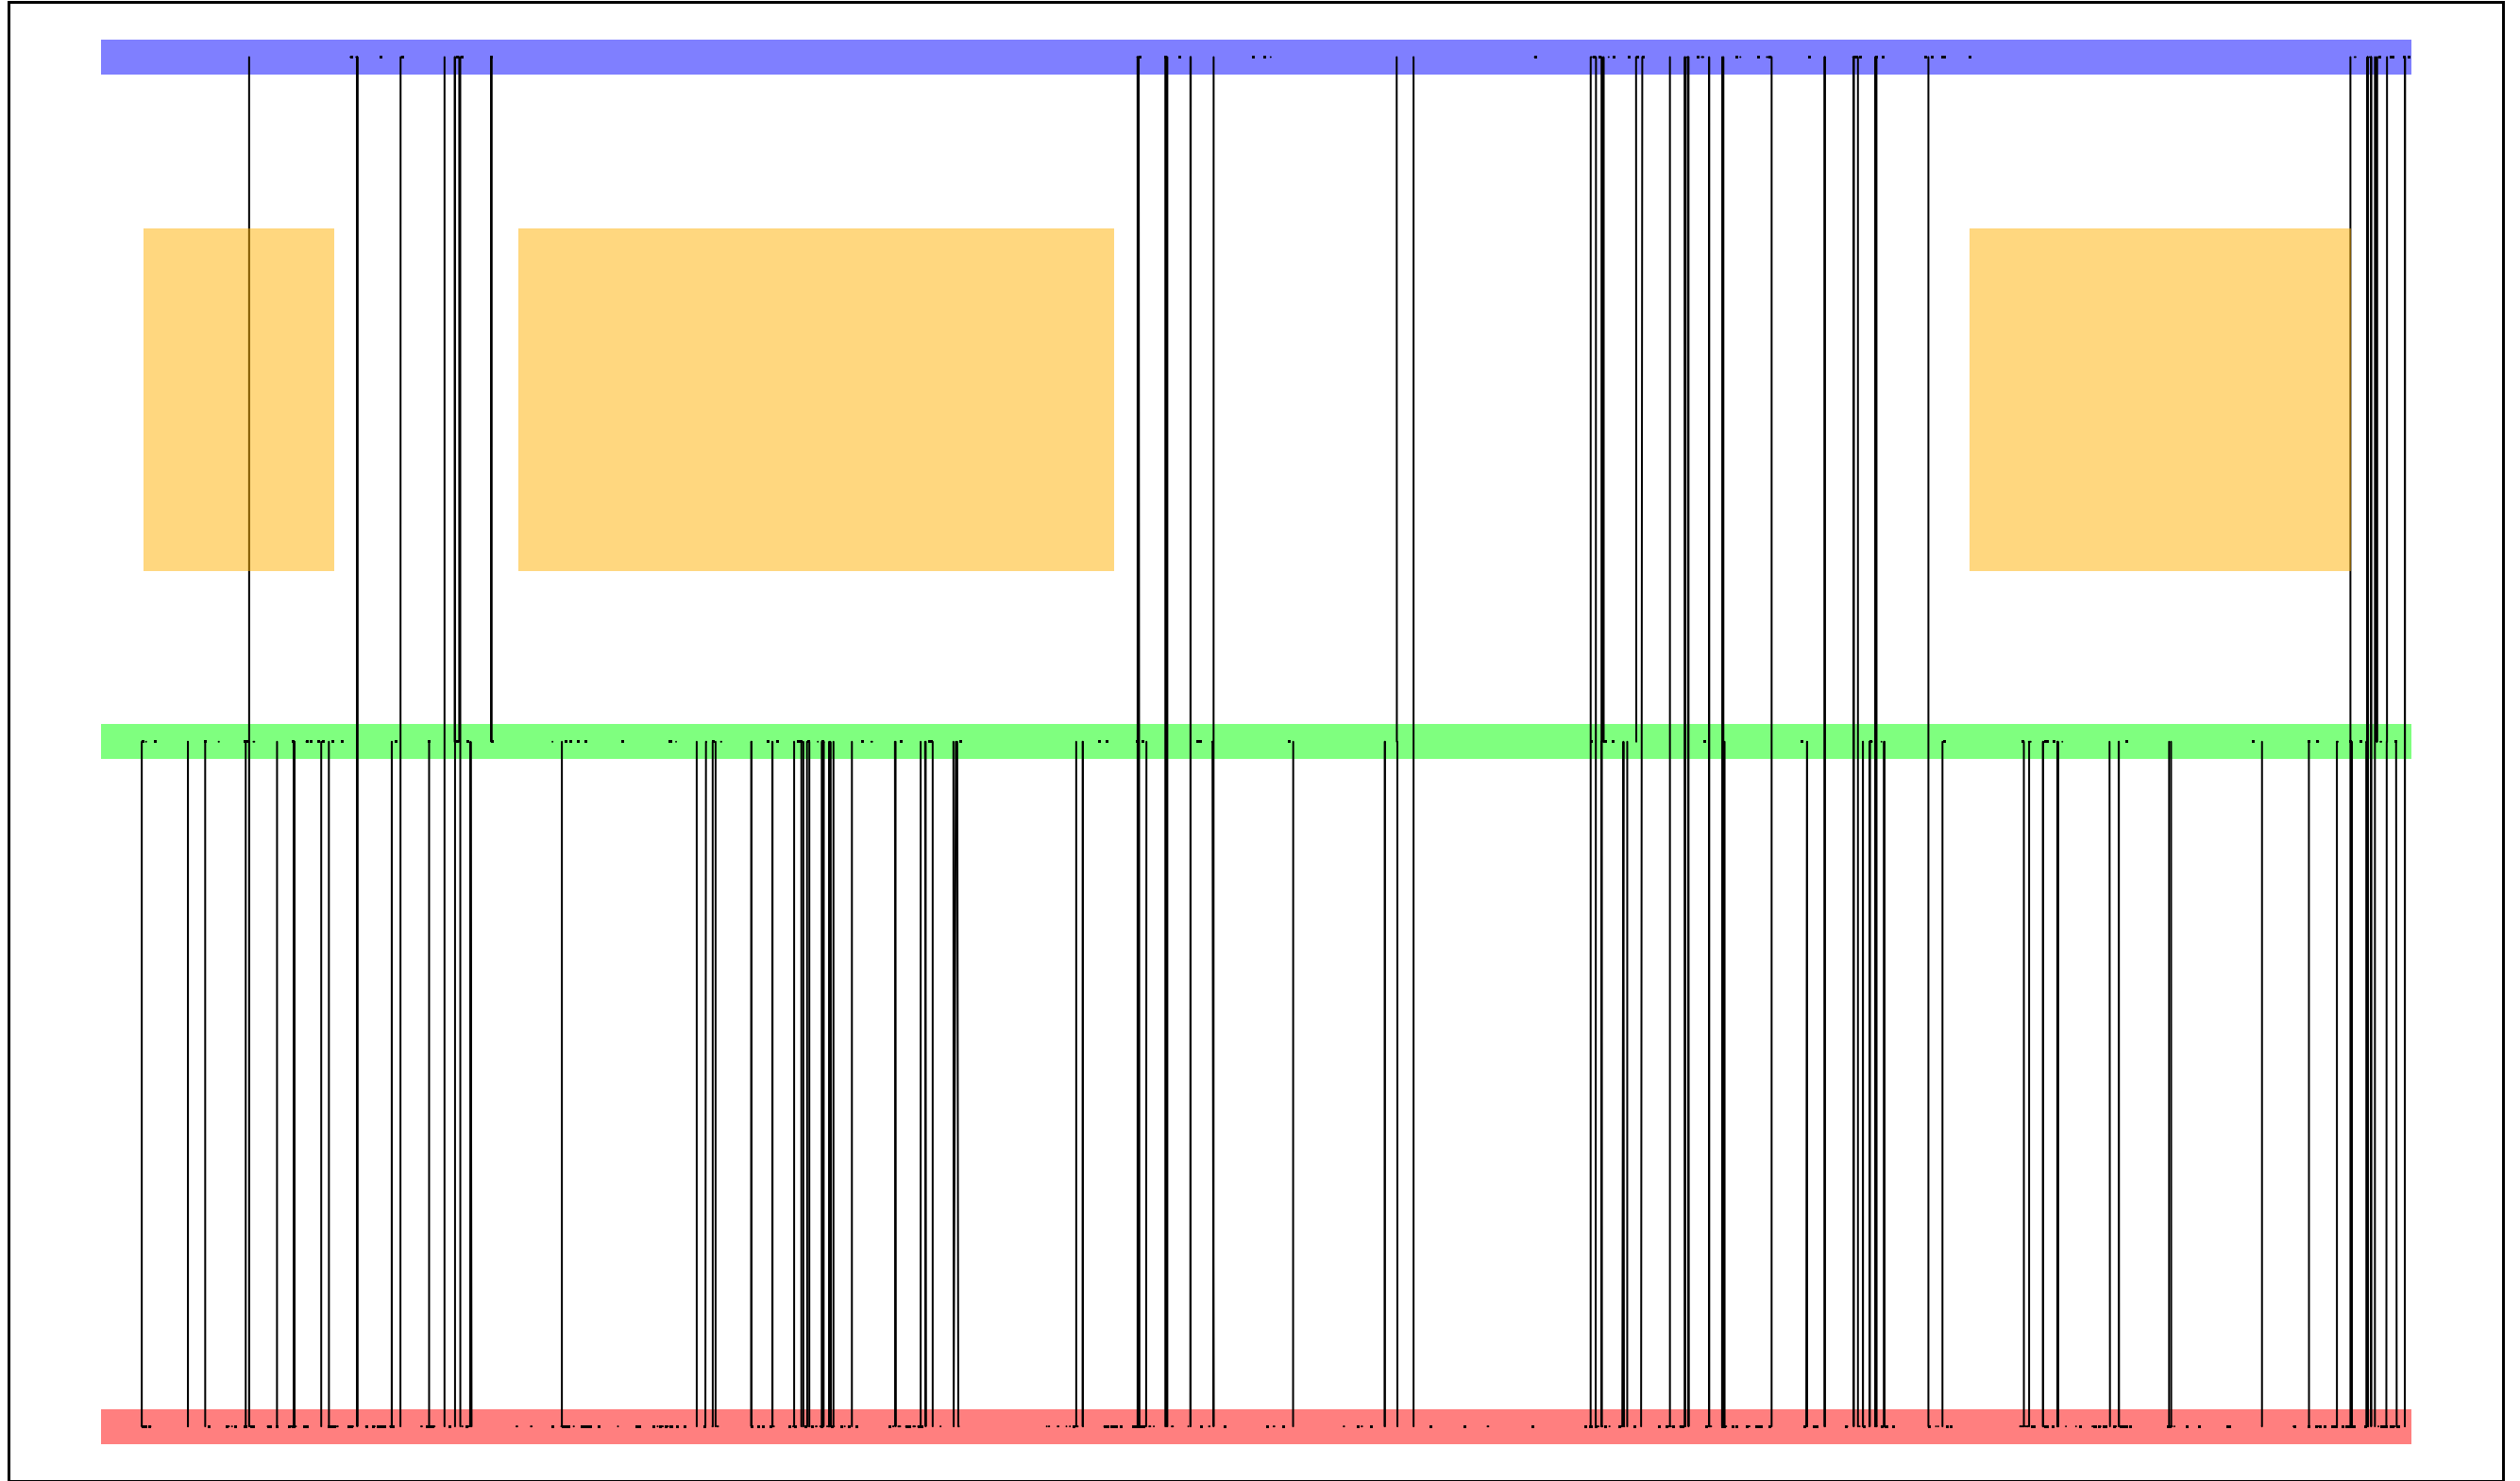

X Chromosome: Pos 1 – 154,899,846

cms22744 – cms22745

DISCORDANT

CONCORDANT ALT

CONCORDANT REF

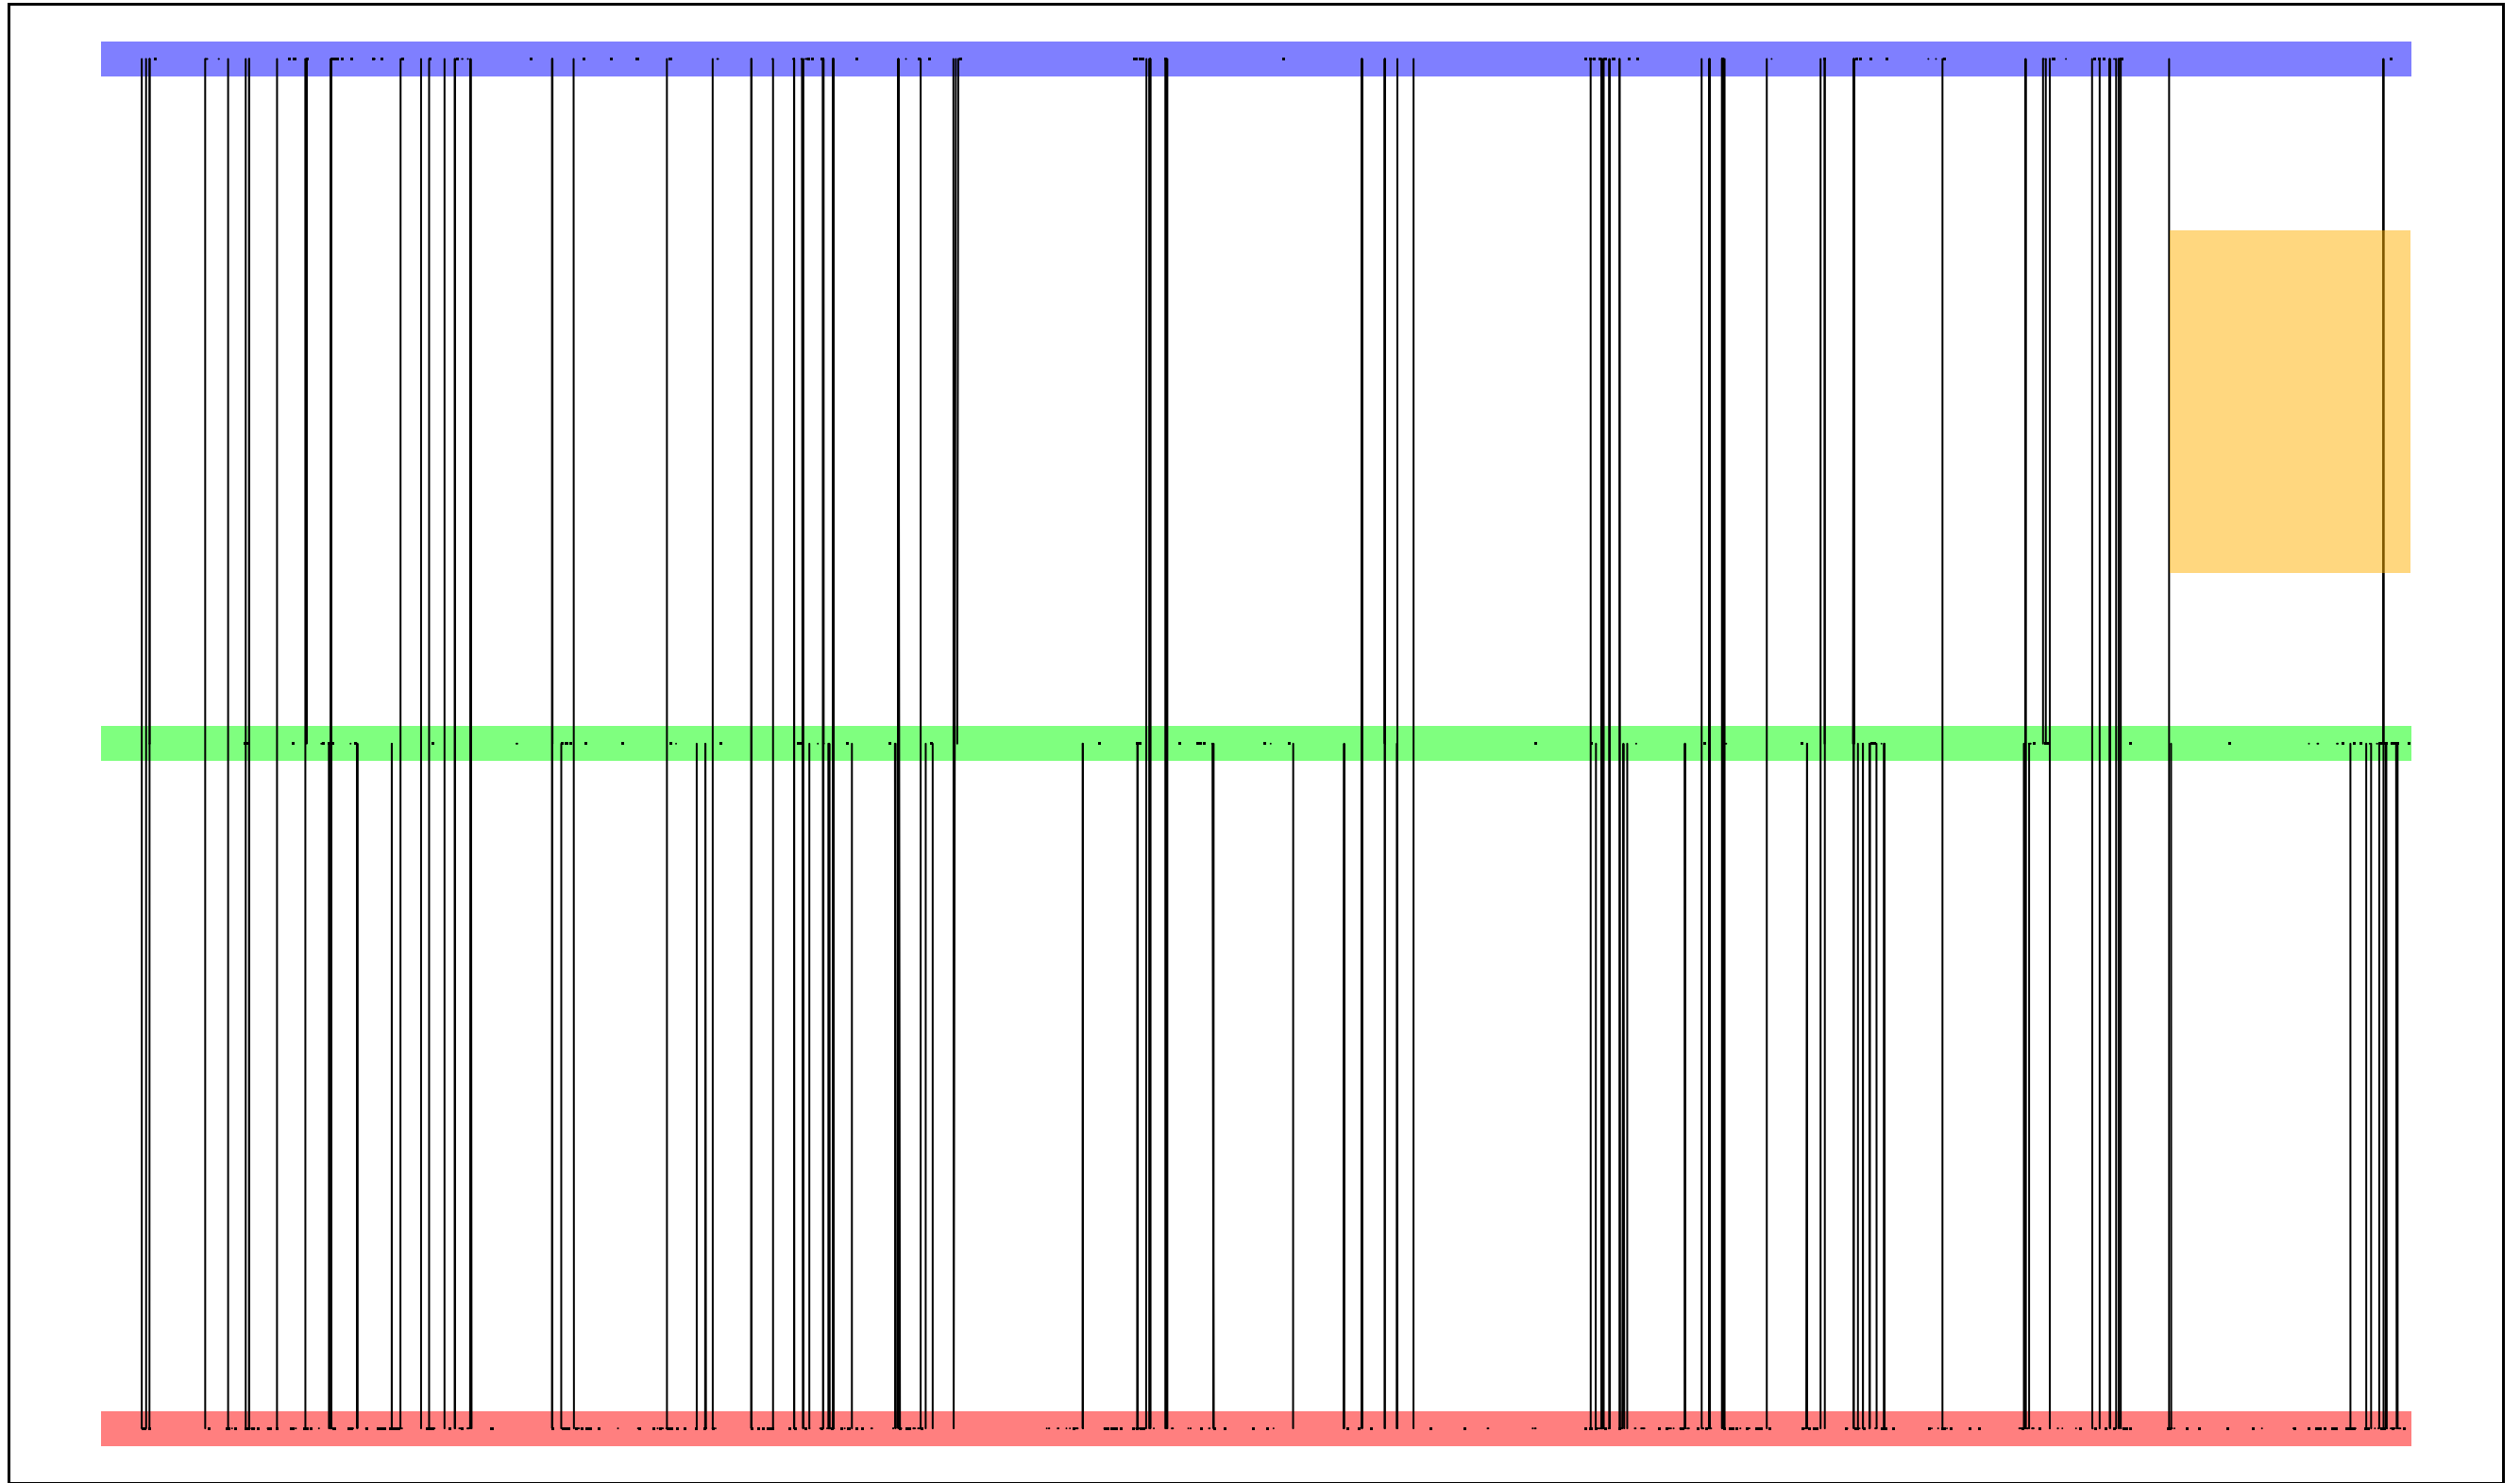

X Chromosome: Pos 1 – 154,899,846

cms13265 – cms13267

DISCORDANT

CONCORDANT ALT

CONCORDANT REF

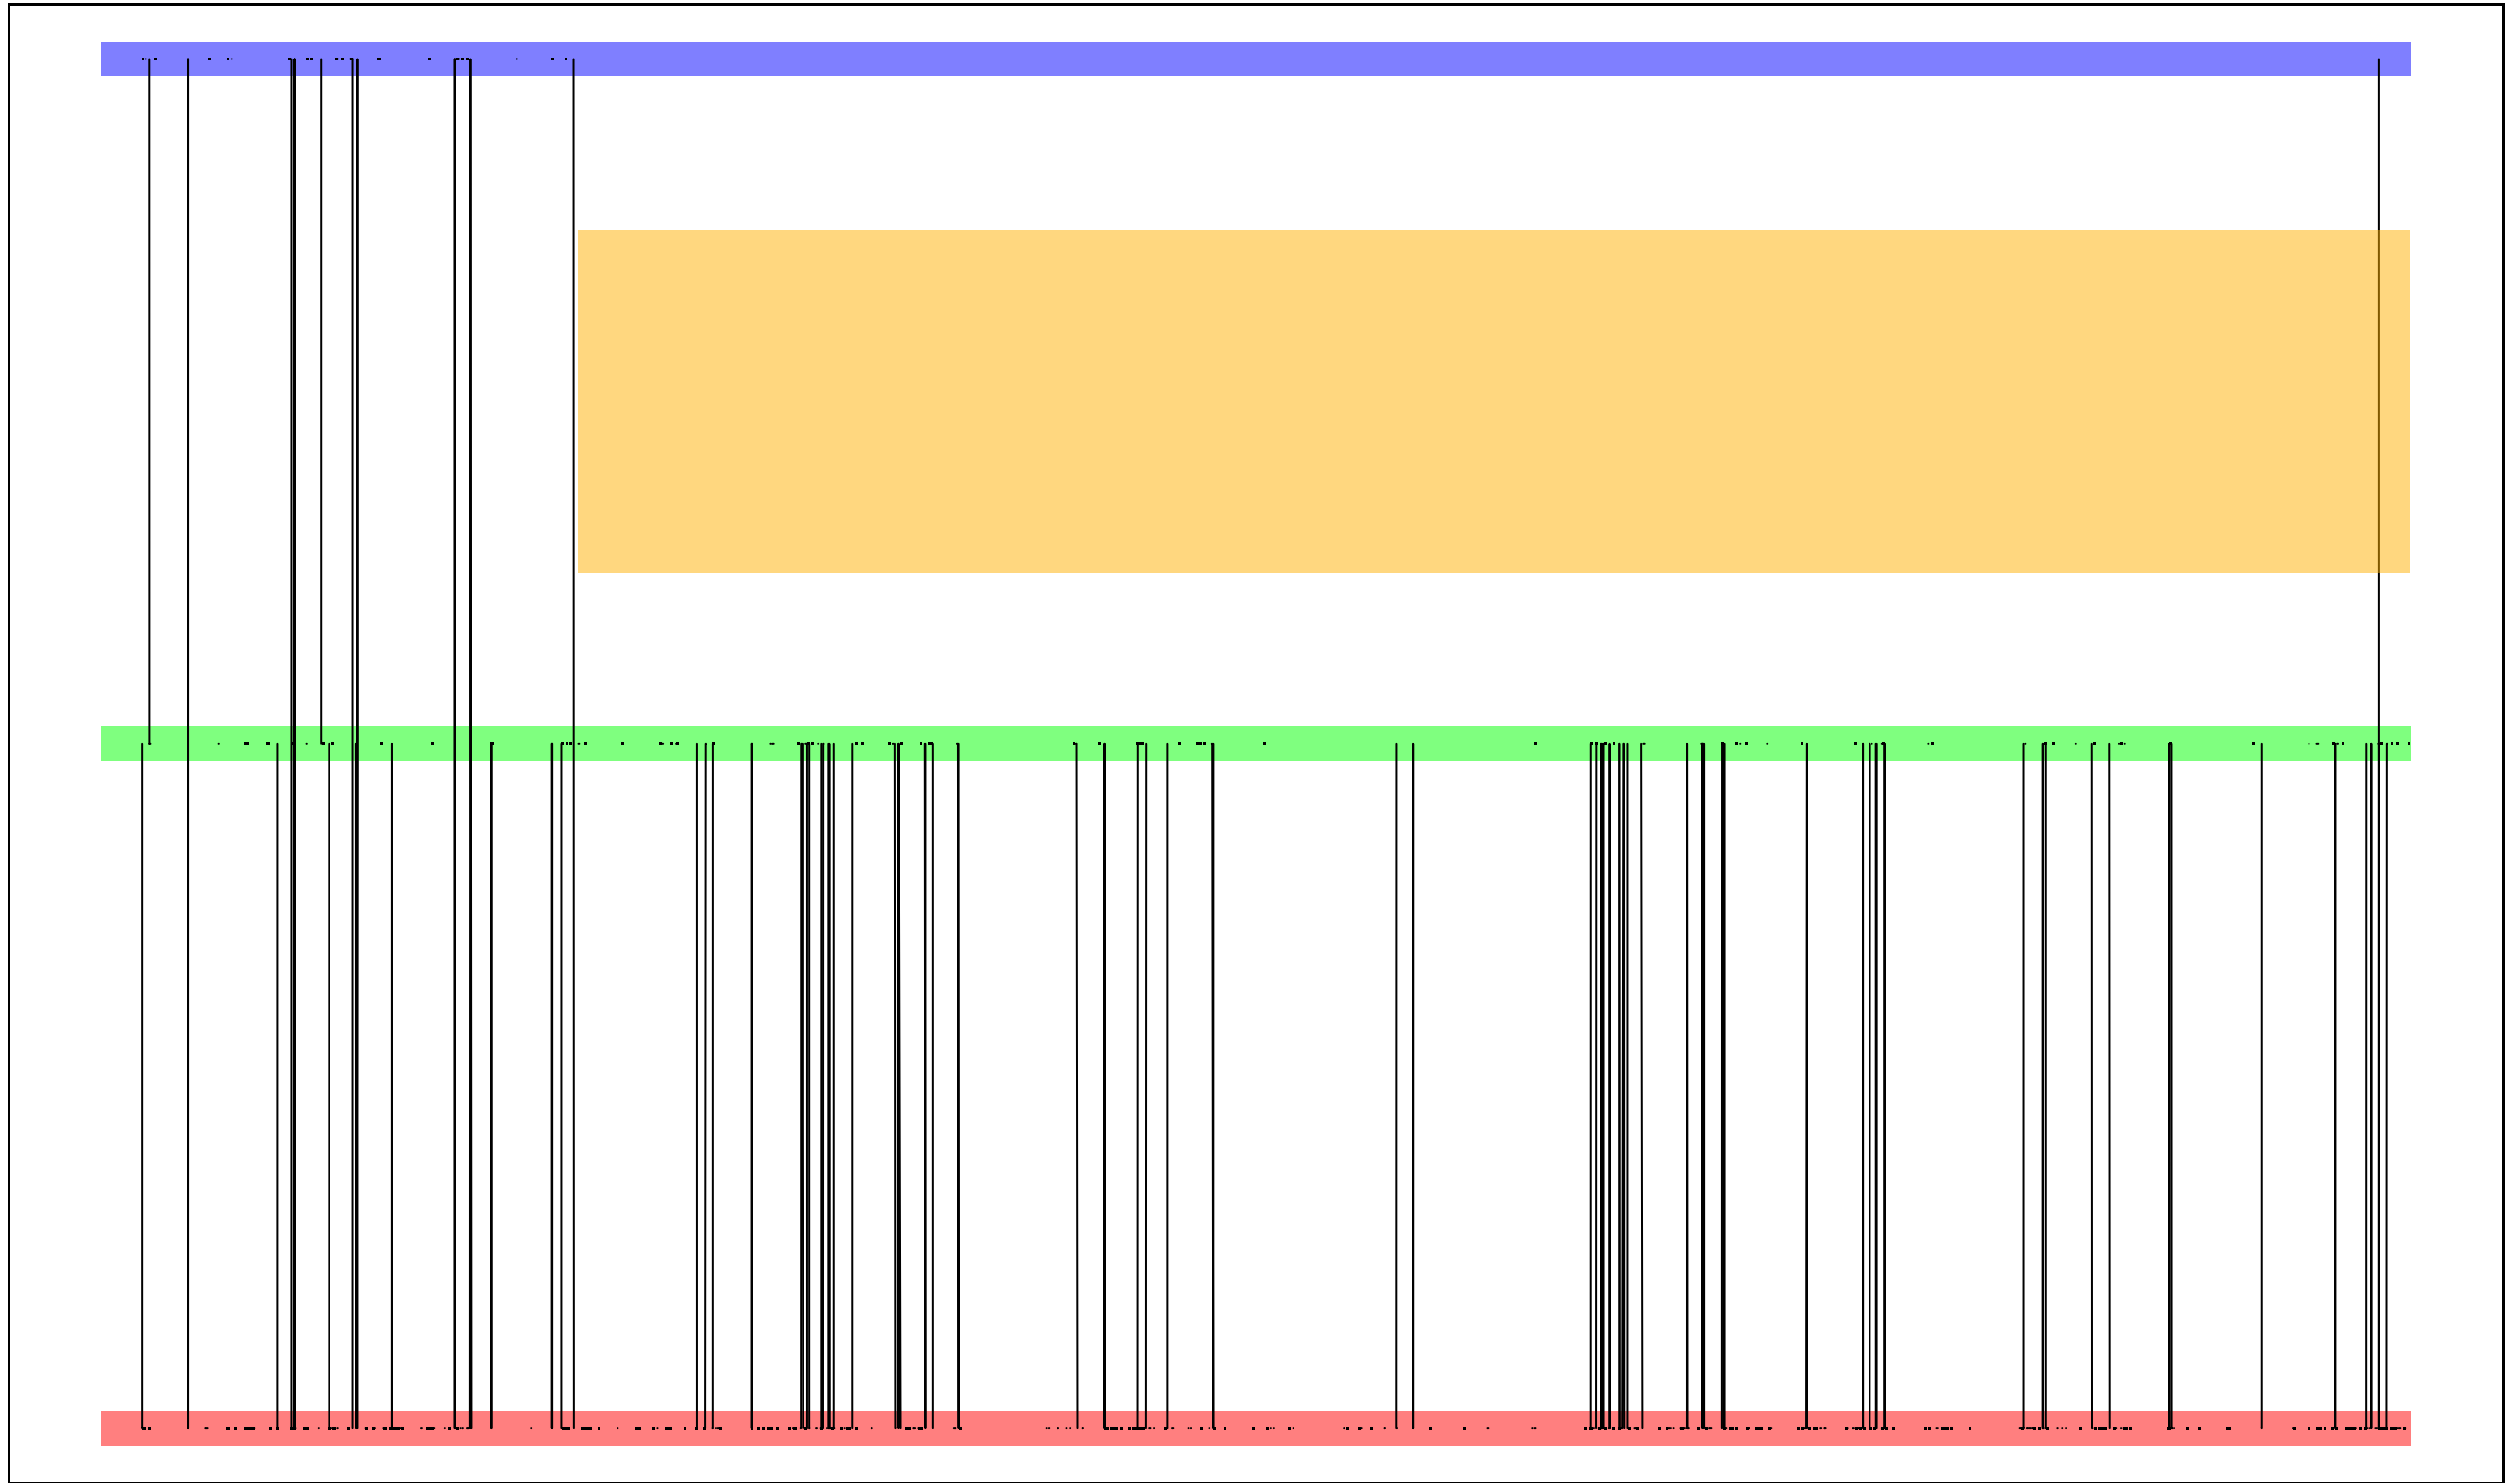

X Chromosome: Pos 1 – 154,899,846

cms12805 – cms12871

DISCORDANT

CONCORDANT ALT

CONCORDANT REF

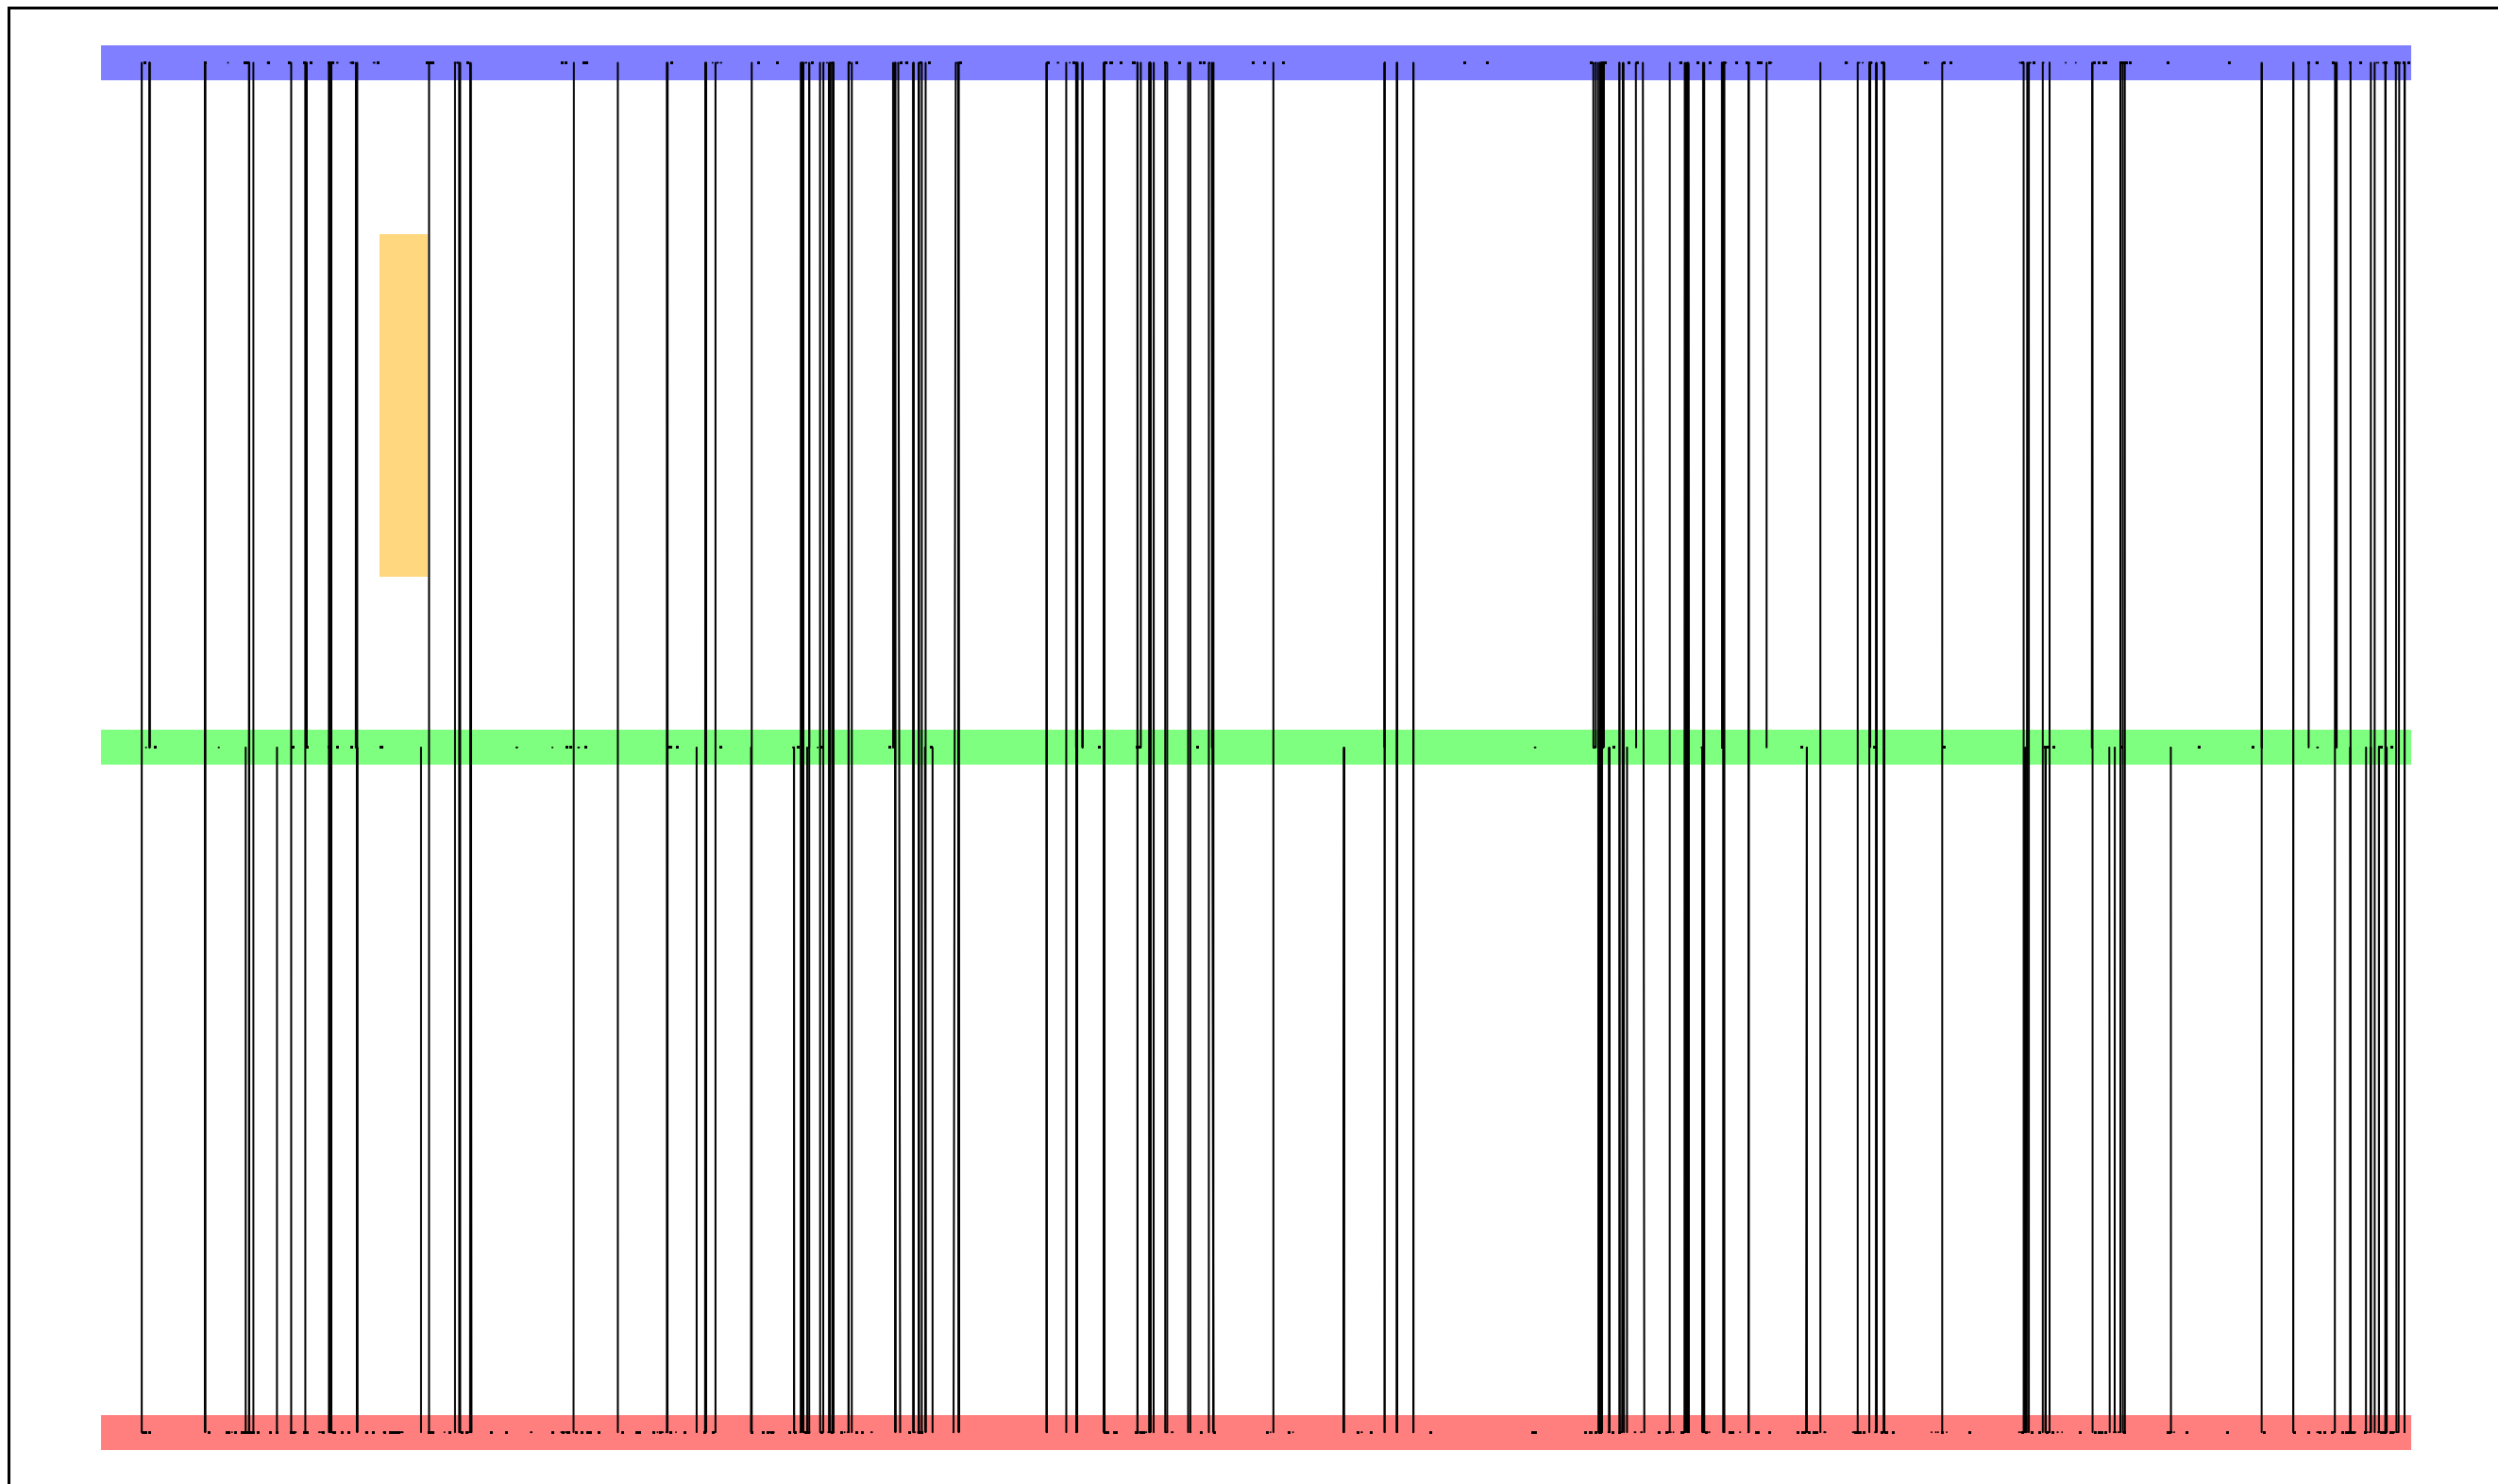

X Chromosome: Pos 1 – 154,899,846

13439 – cms1861

DISCORDANT

CONCORDANT ALT

CONCORDANT REF

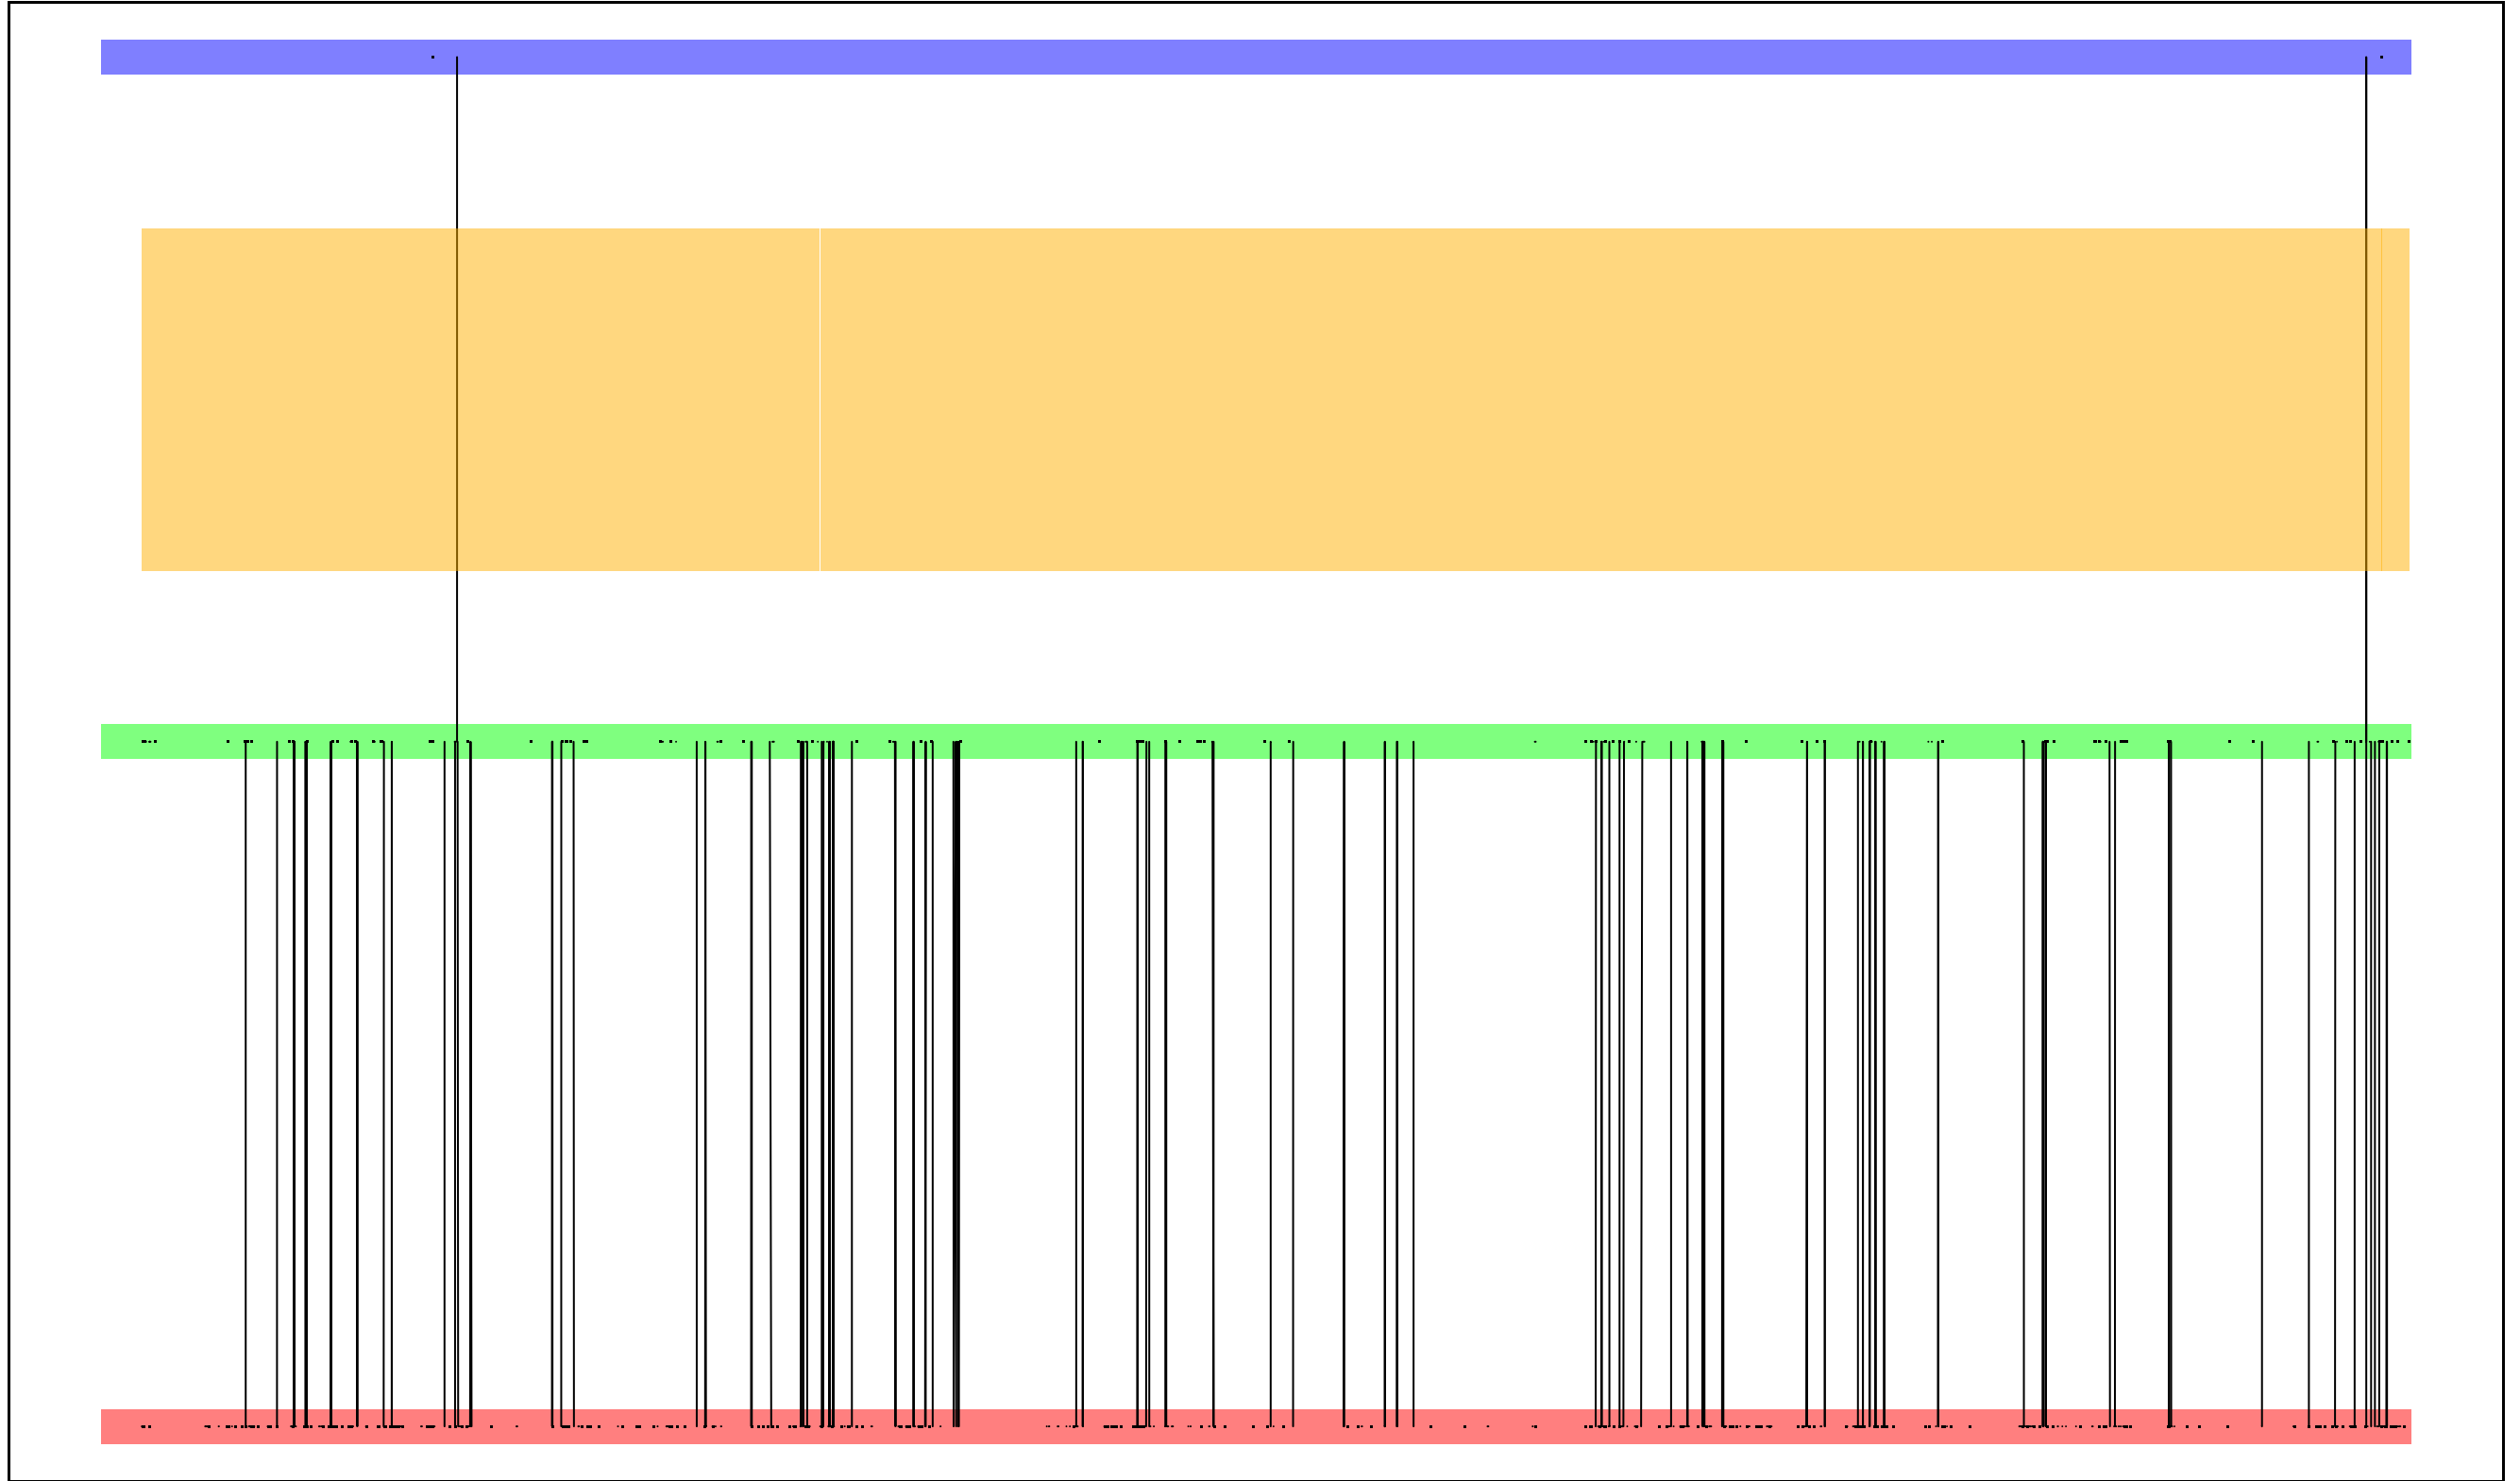

X Chromosome: Pos 1 – 154,899,846

cms2026 – cms2027

DISCORDANT

CONCORDANT ALT

CONCORDANT REF

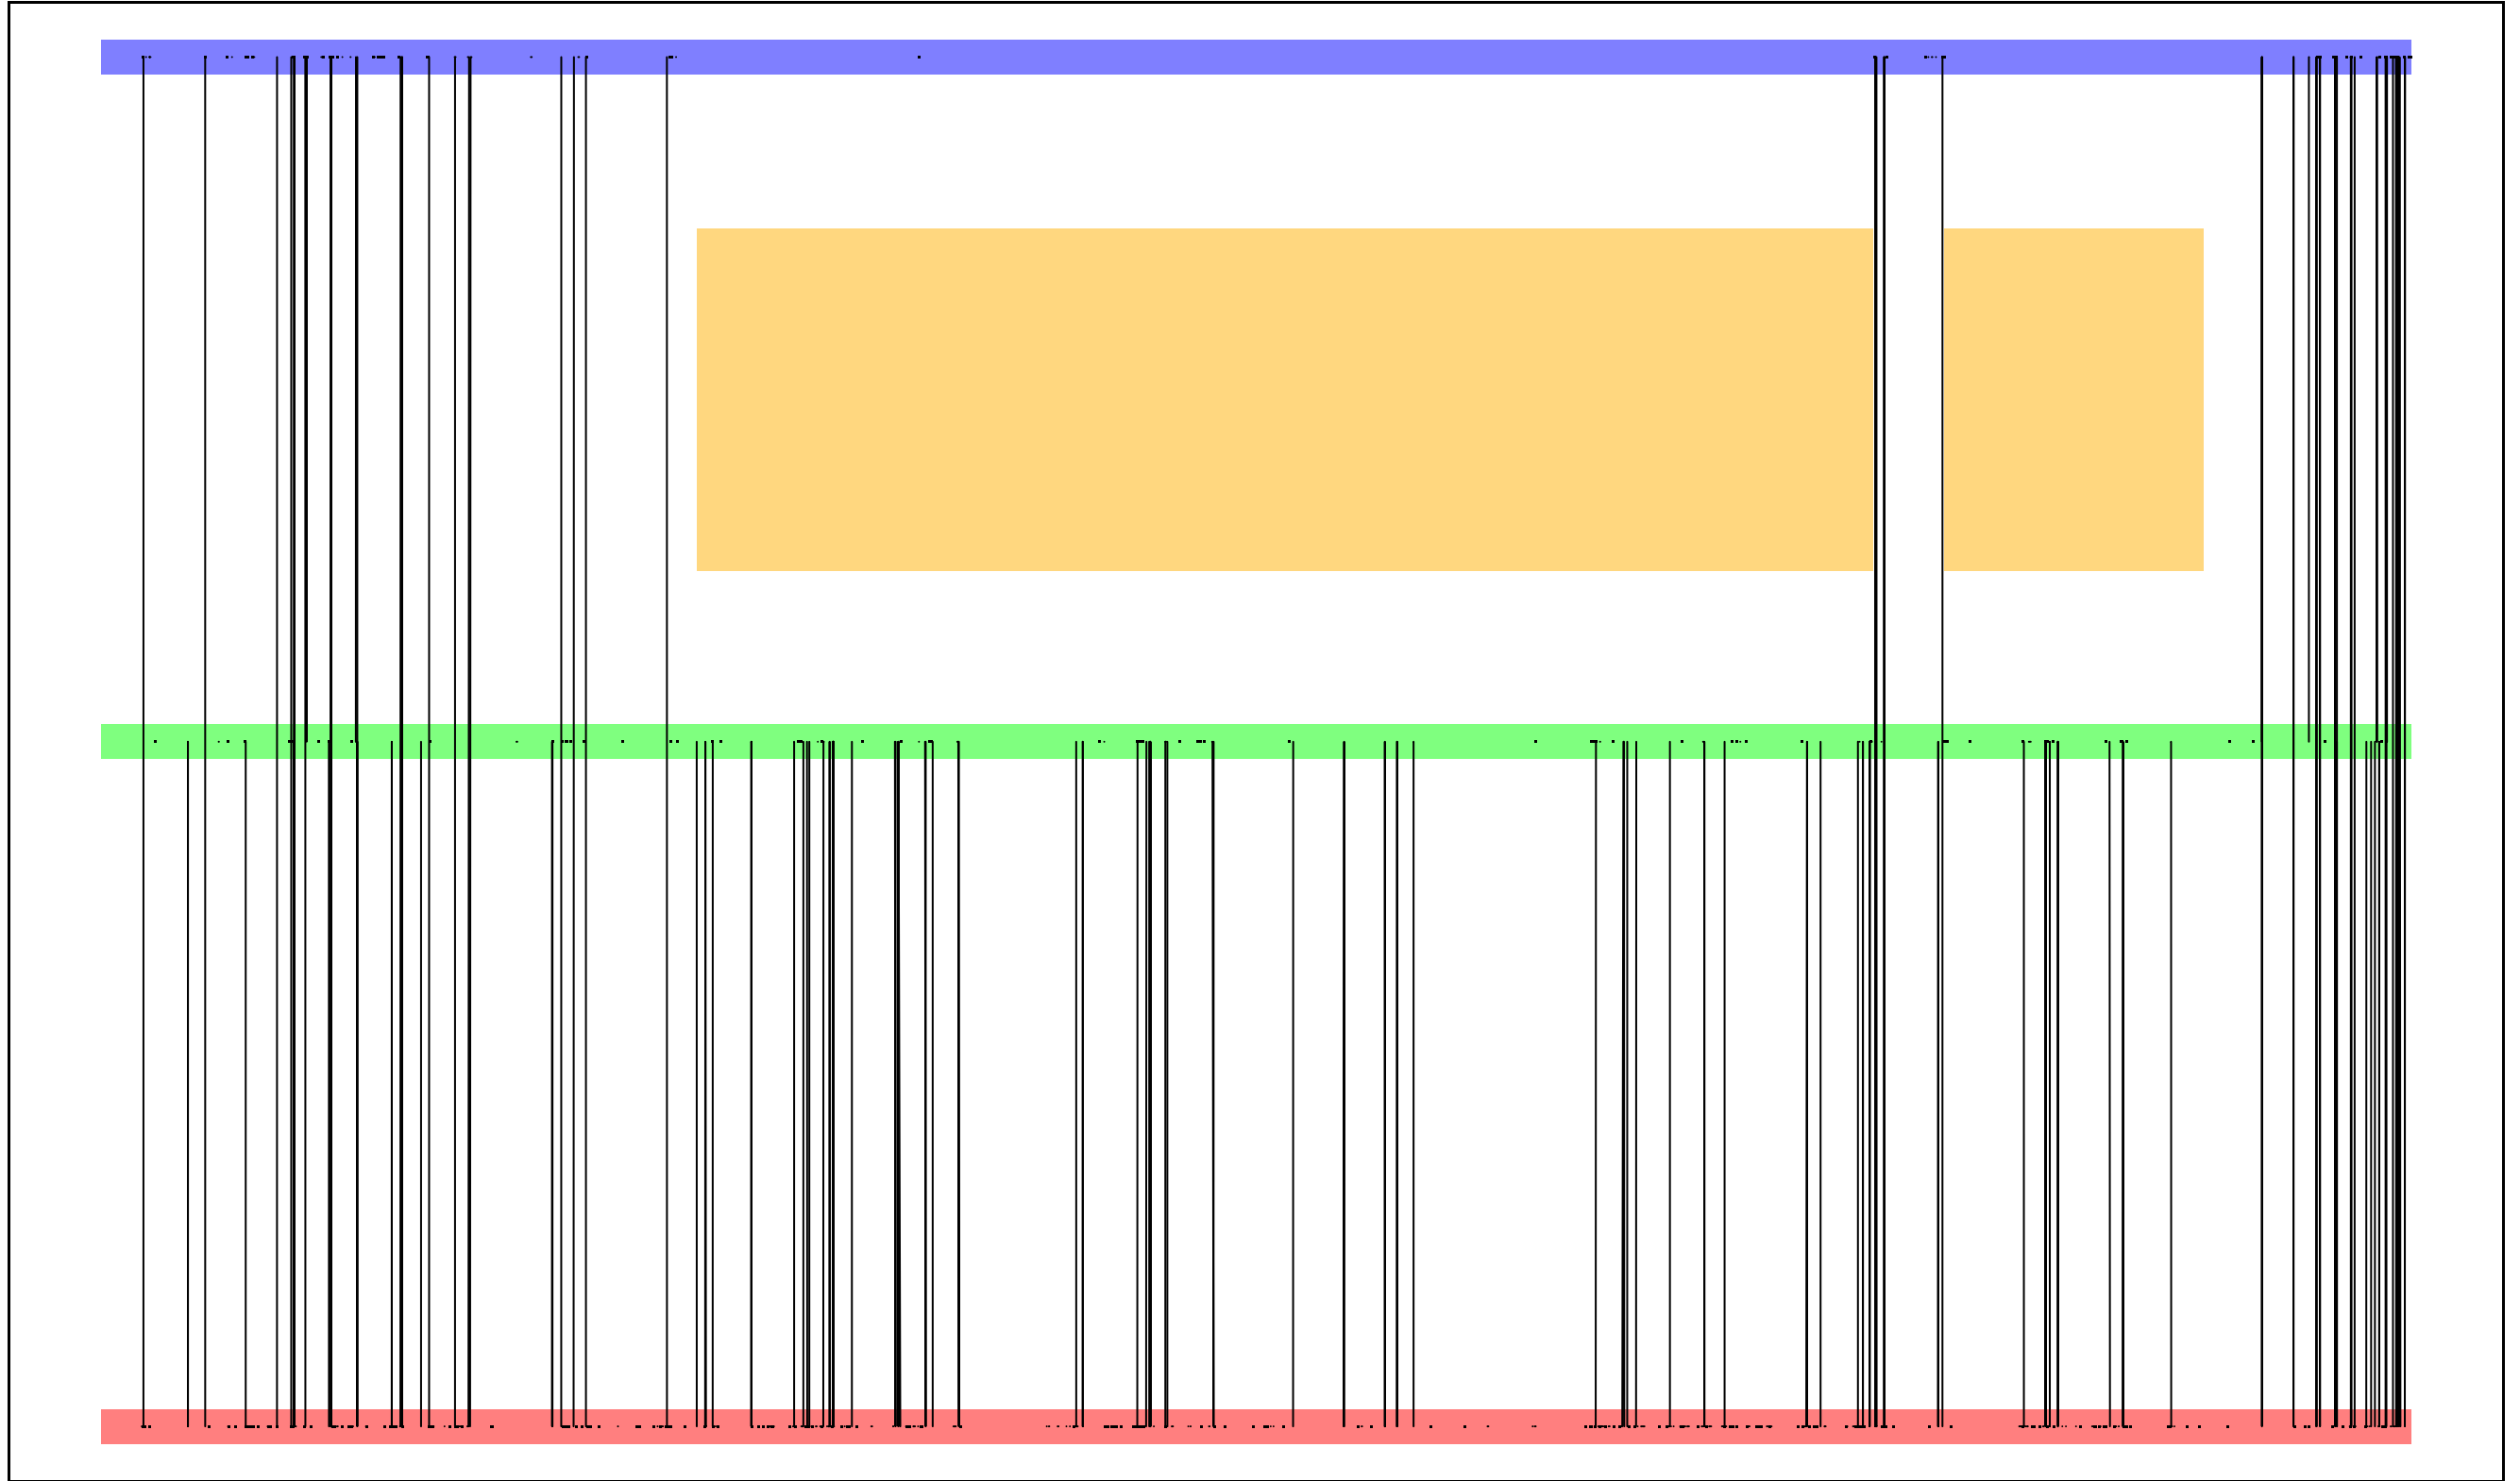

X Chromosome: Pos 1 – 154,899,846

cms9672 – cms9673

DISCORDANT

CONCORDANT ALT

CONCORDANT REF

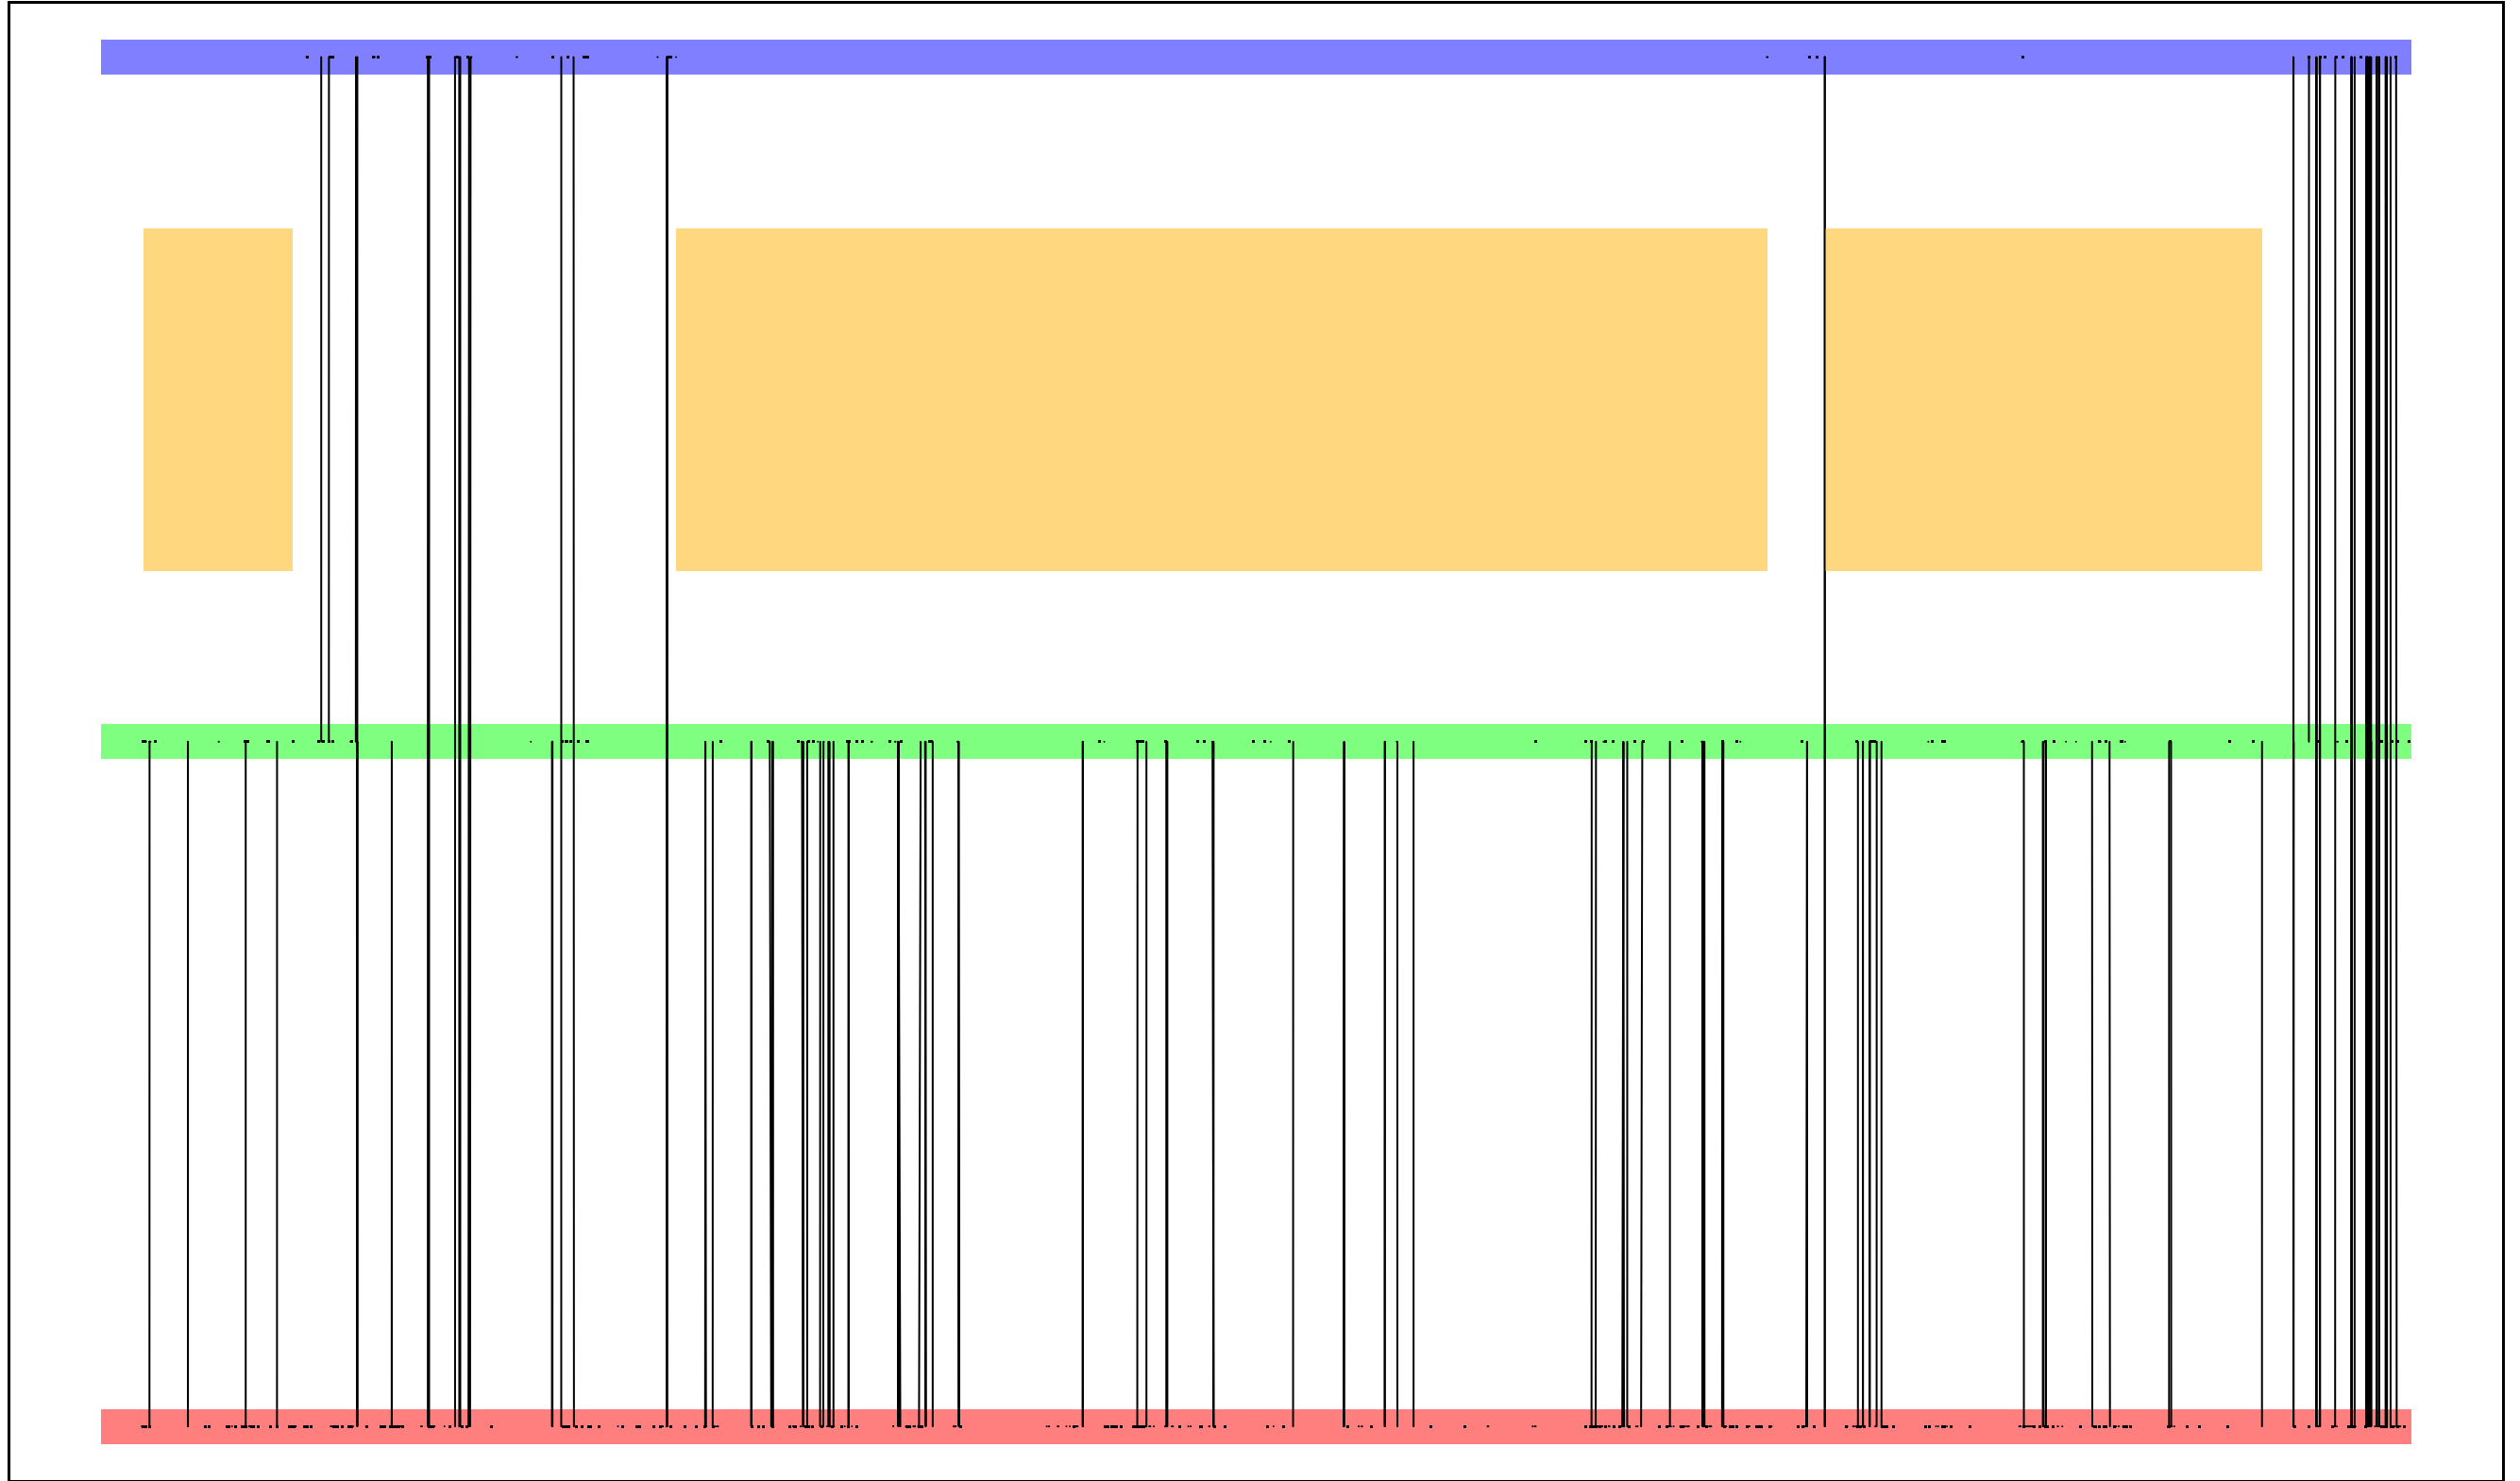

X Chromosome: Pos 1 – 154,899,846

cms20461 – cms20462

DISCORDANT

CONCORDANT ALT

CONCORDANT REF

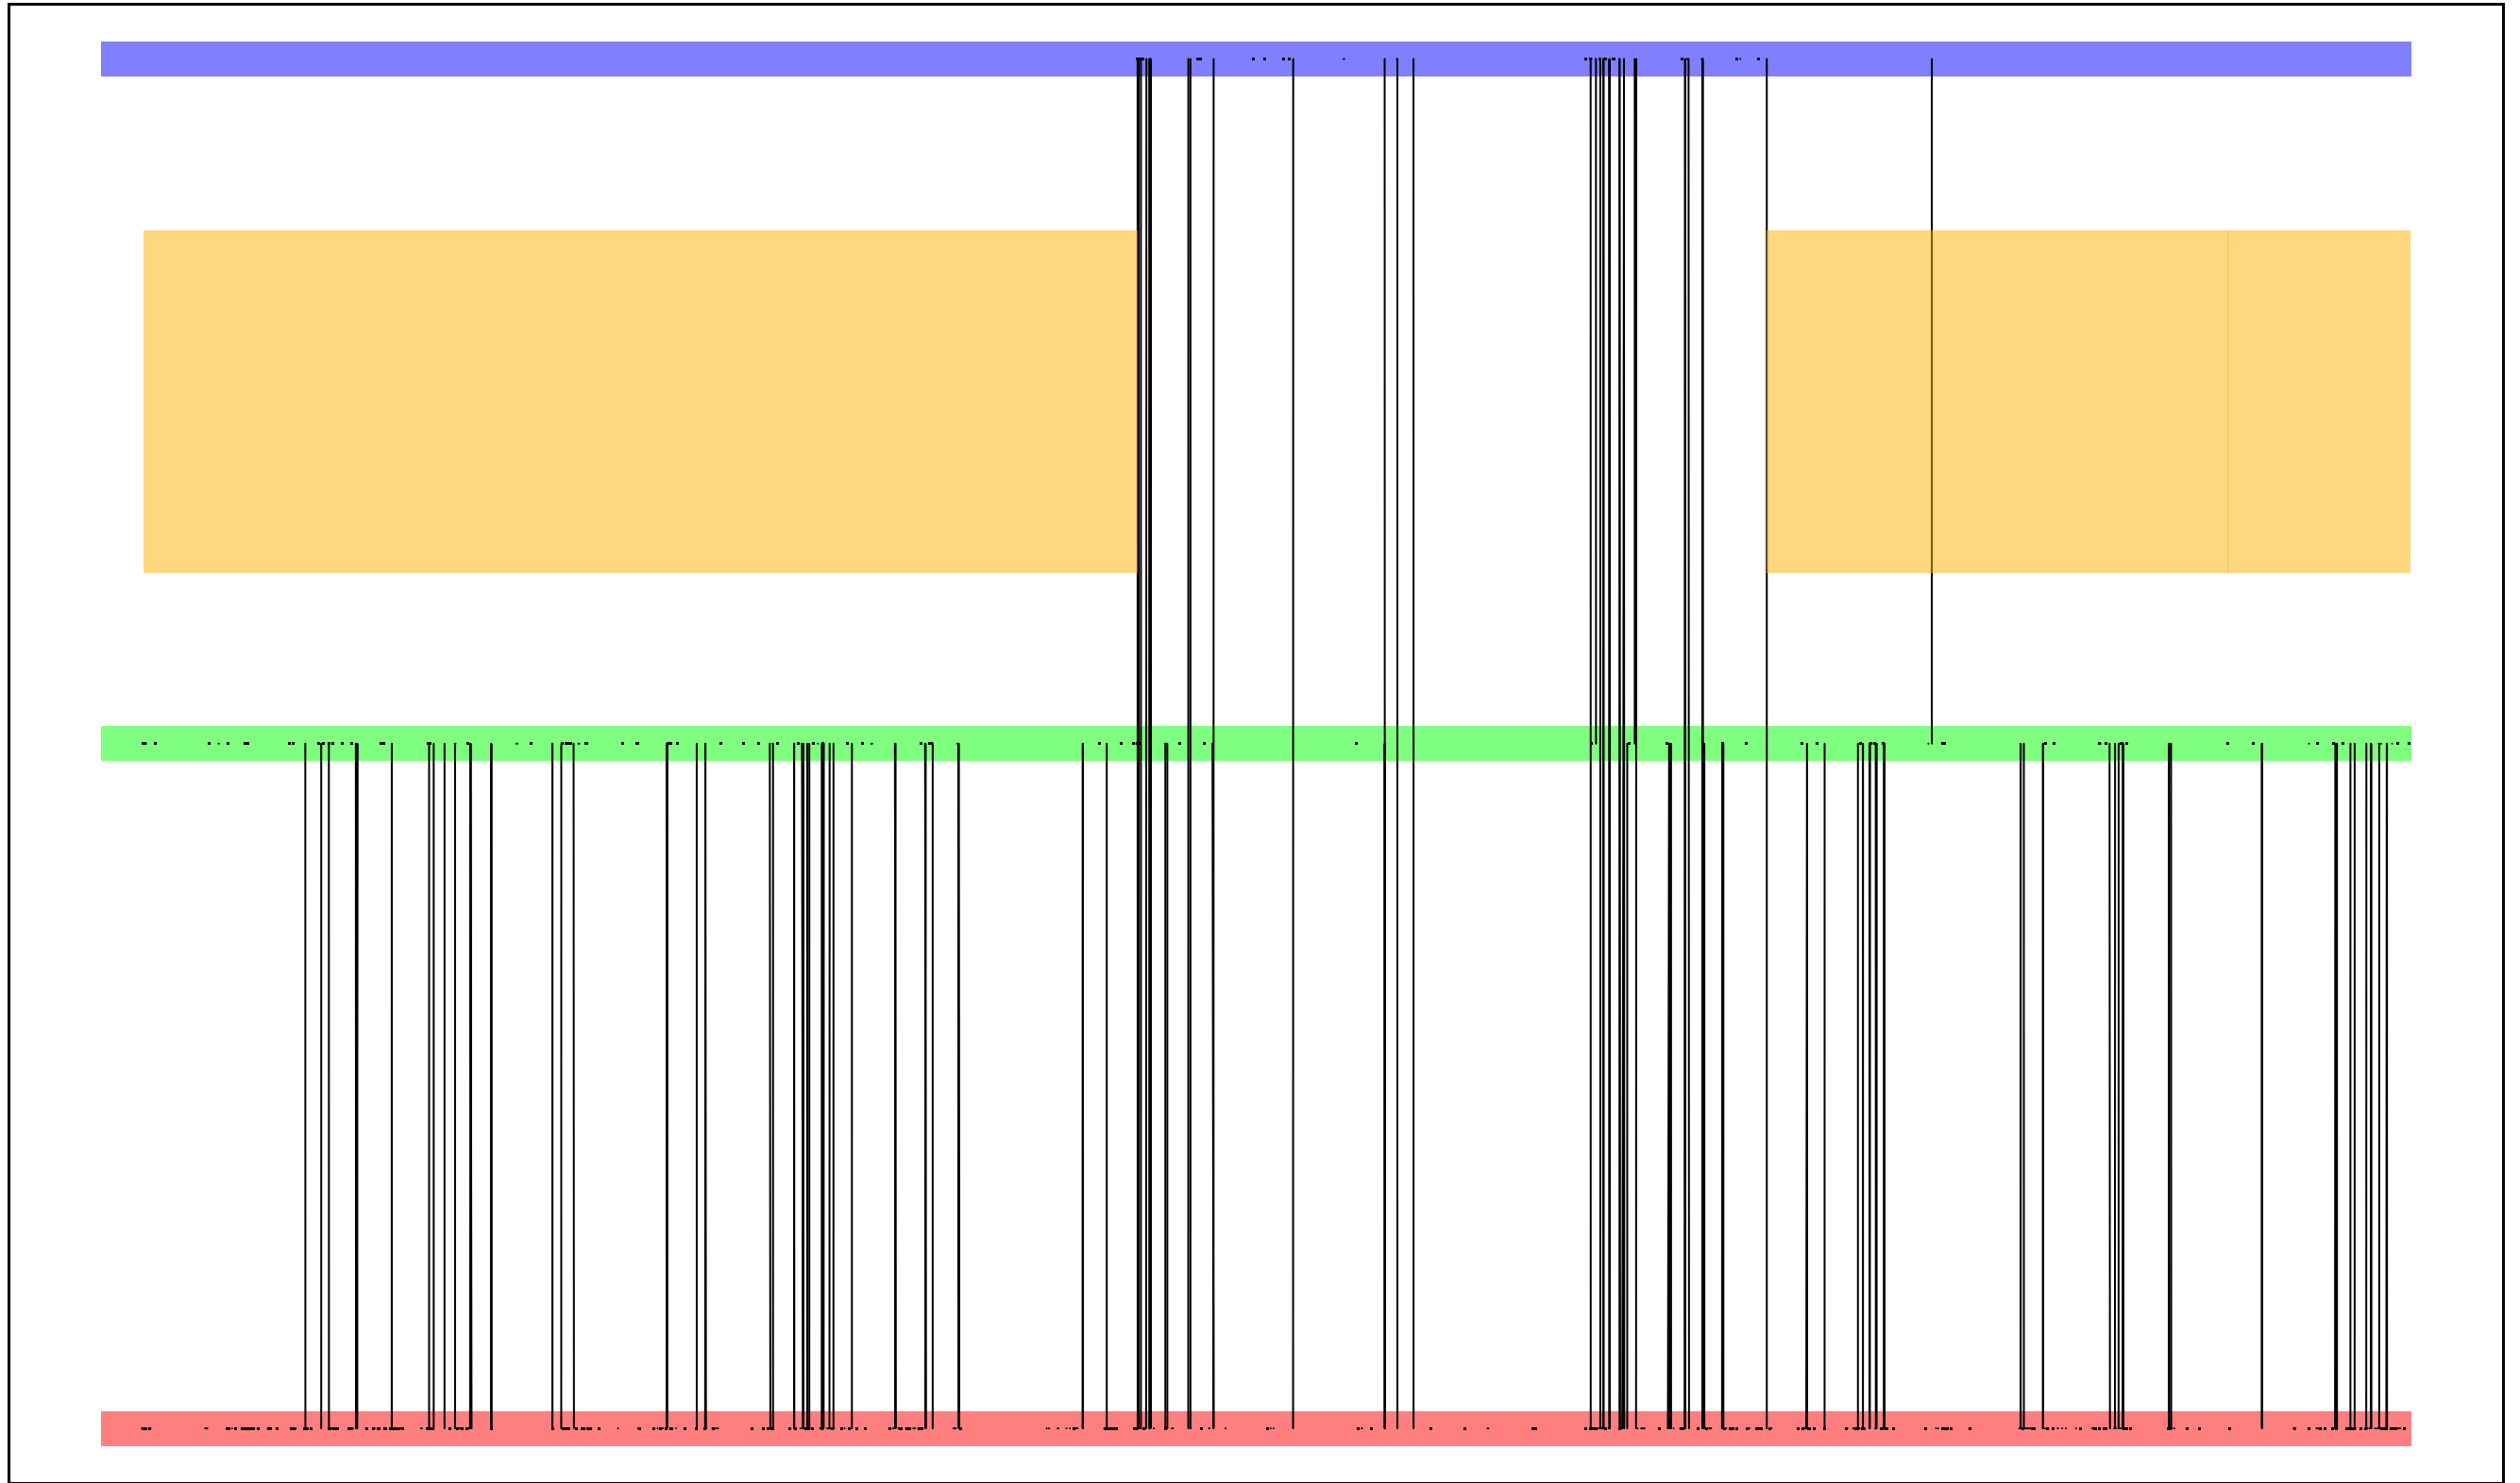

X Chromosome: Pos 1 – 154,899,846



cms18655 – cms18656

DISCORDANT

CONCORDANT ALT

CONCORDANT REF

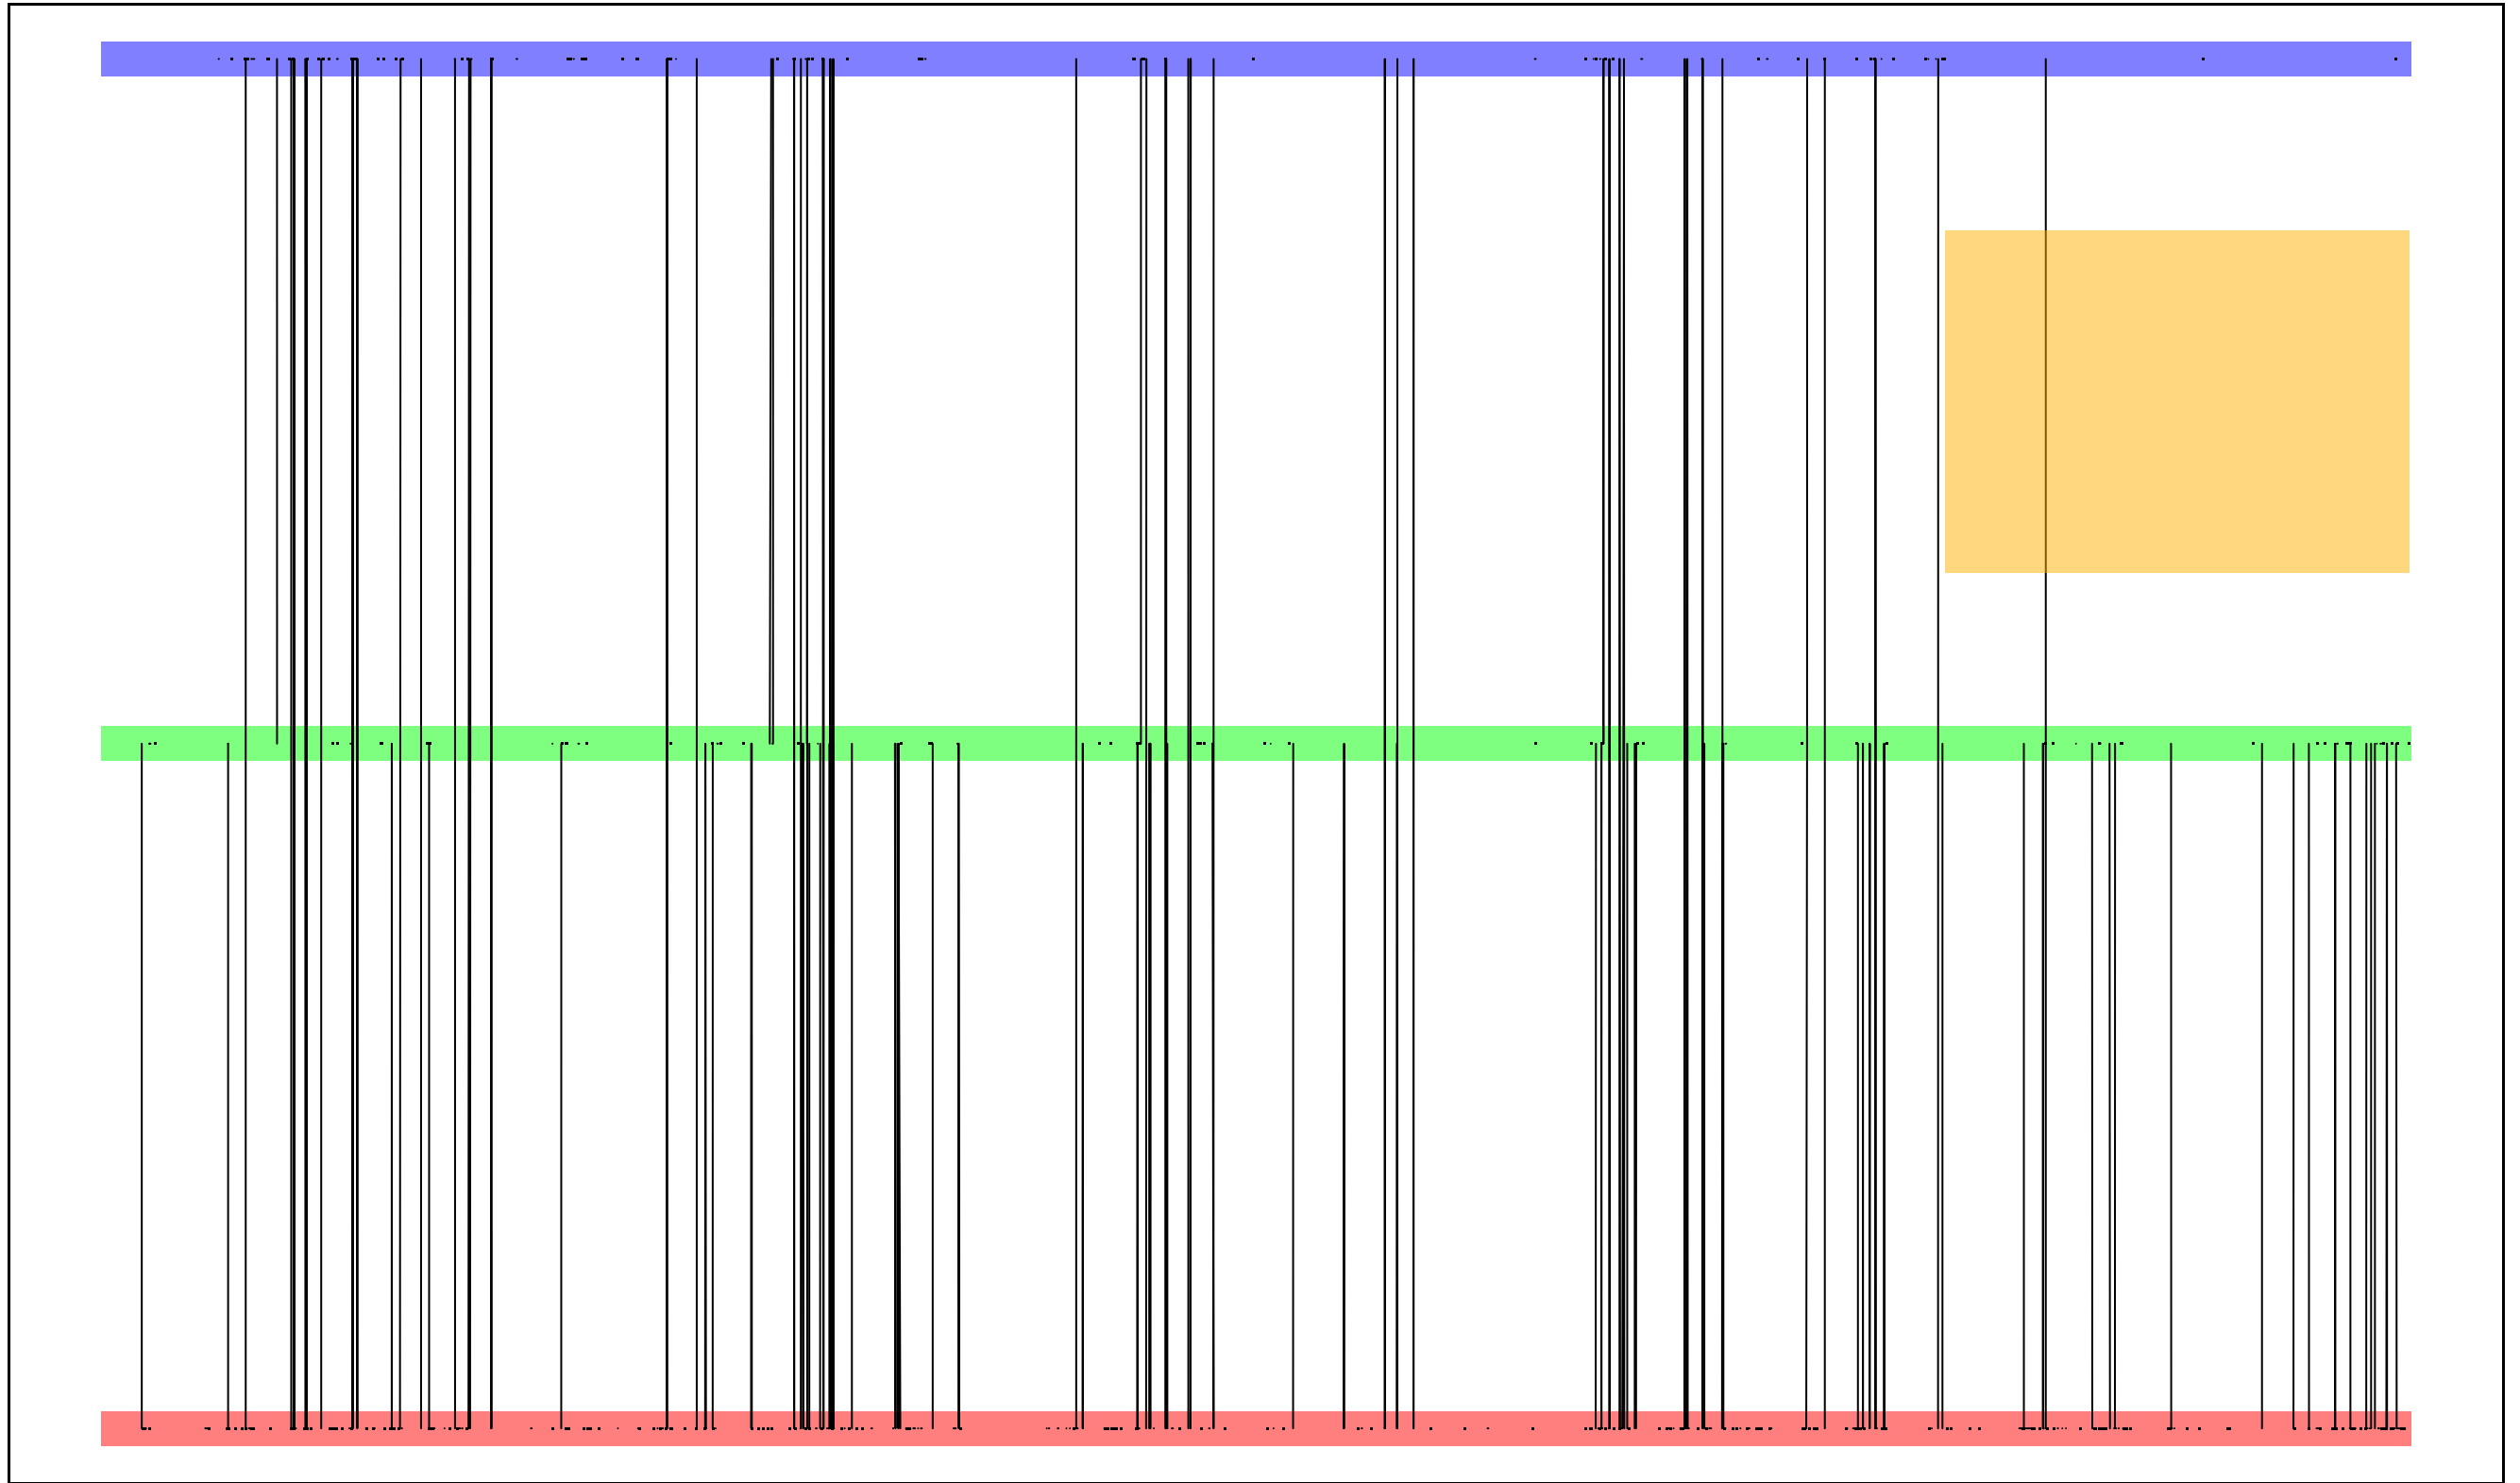

X Chromosome: Pos 1 – 154,899,846

cms0559a – cms19029

DISCORDANT

CONCORDANT ALT

CONCORDANT REF

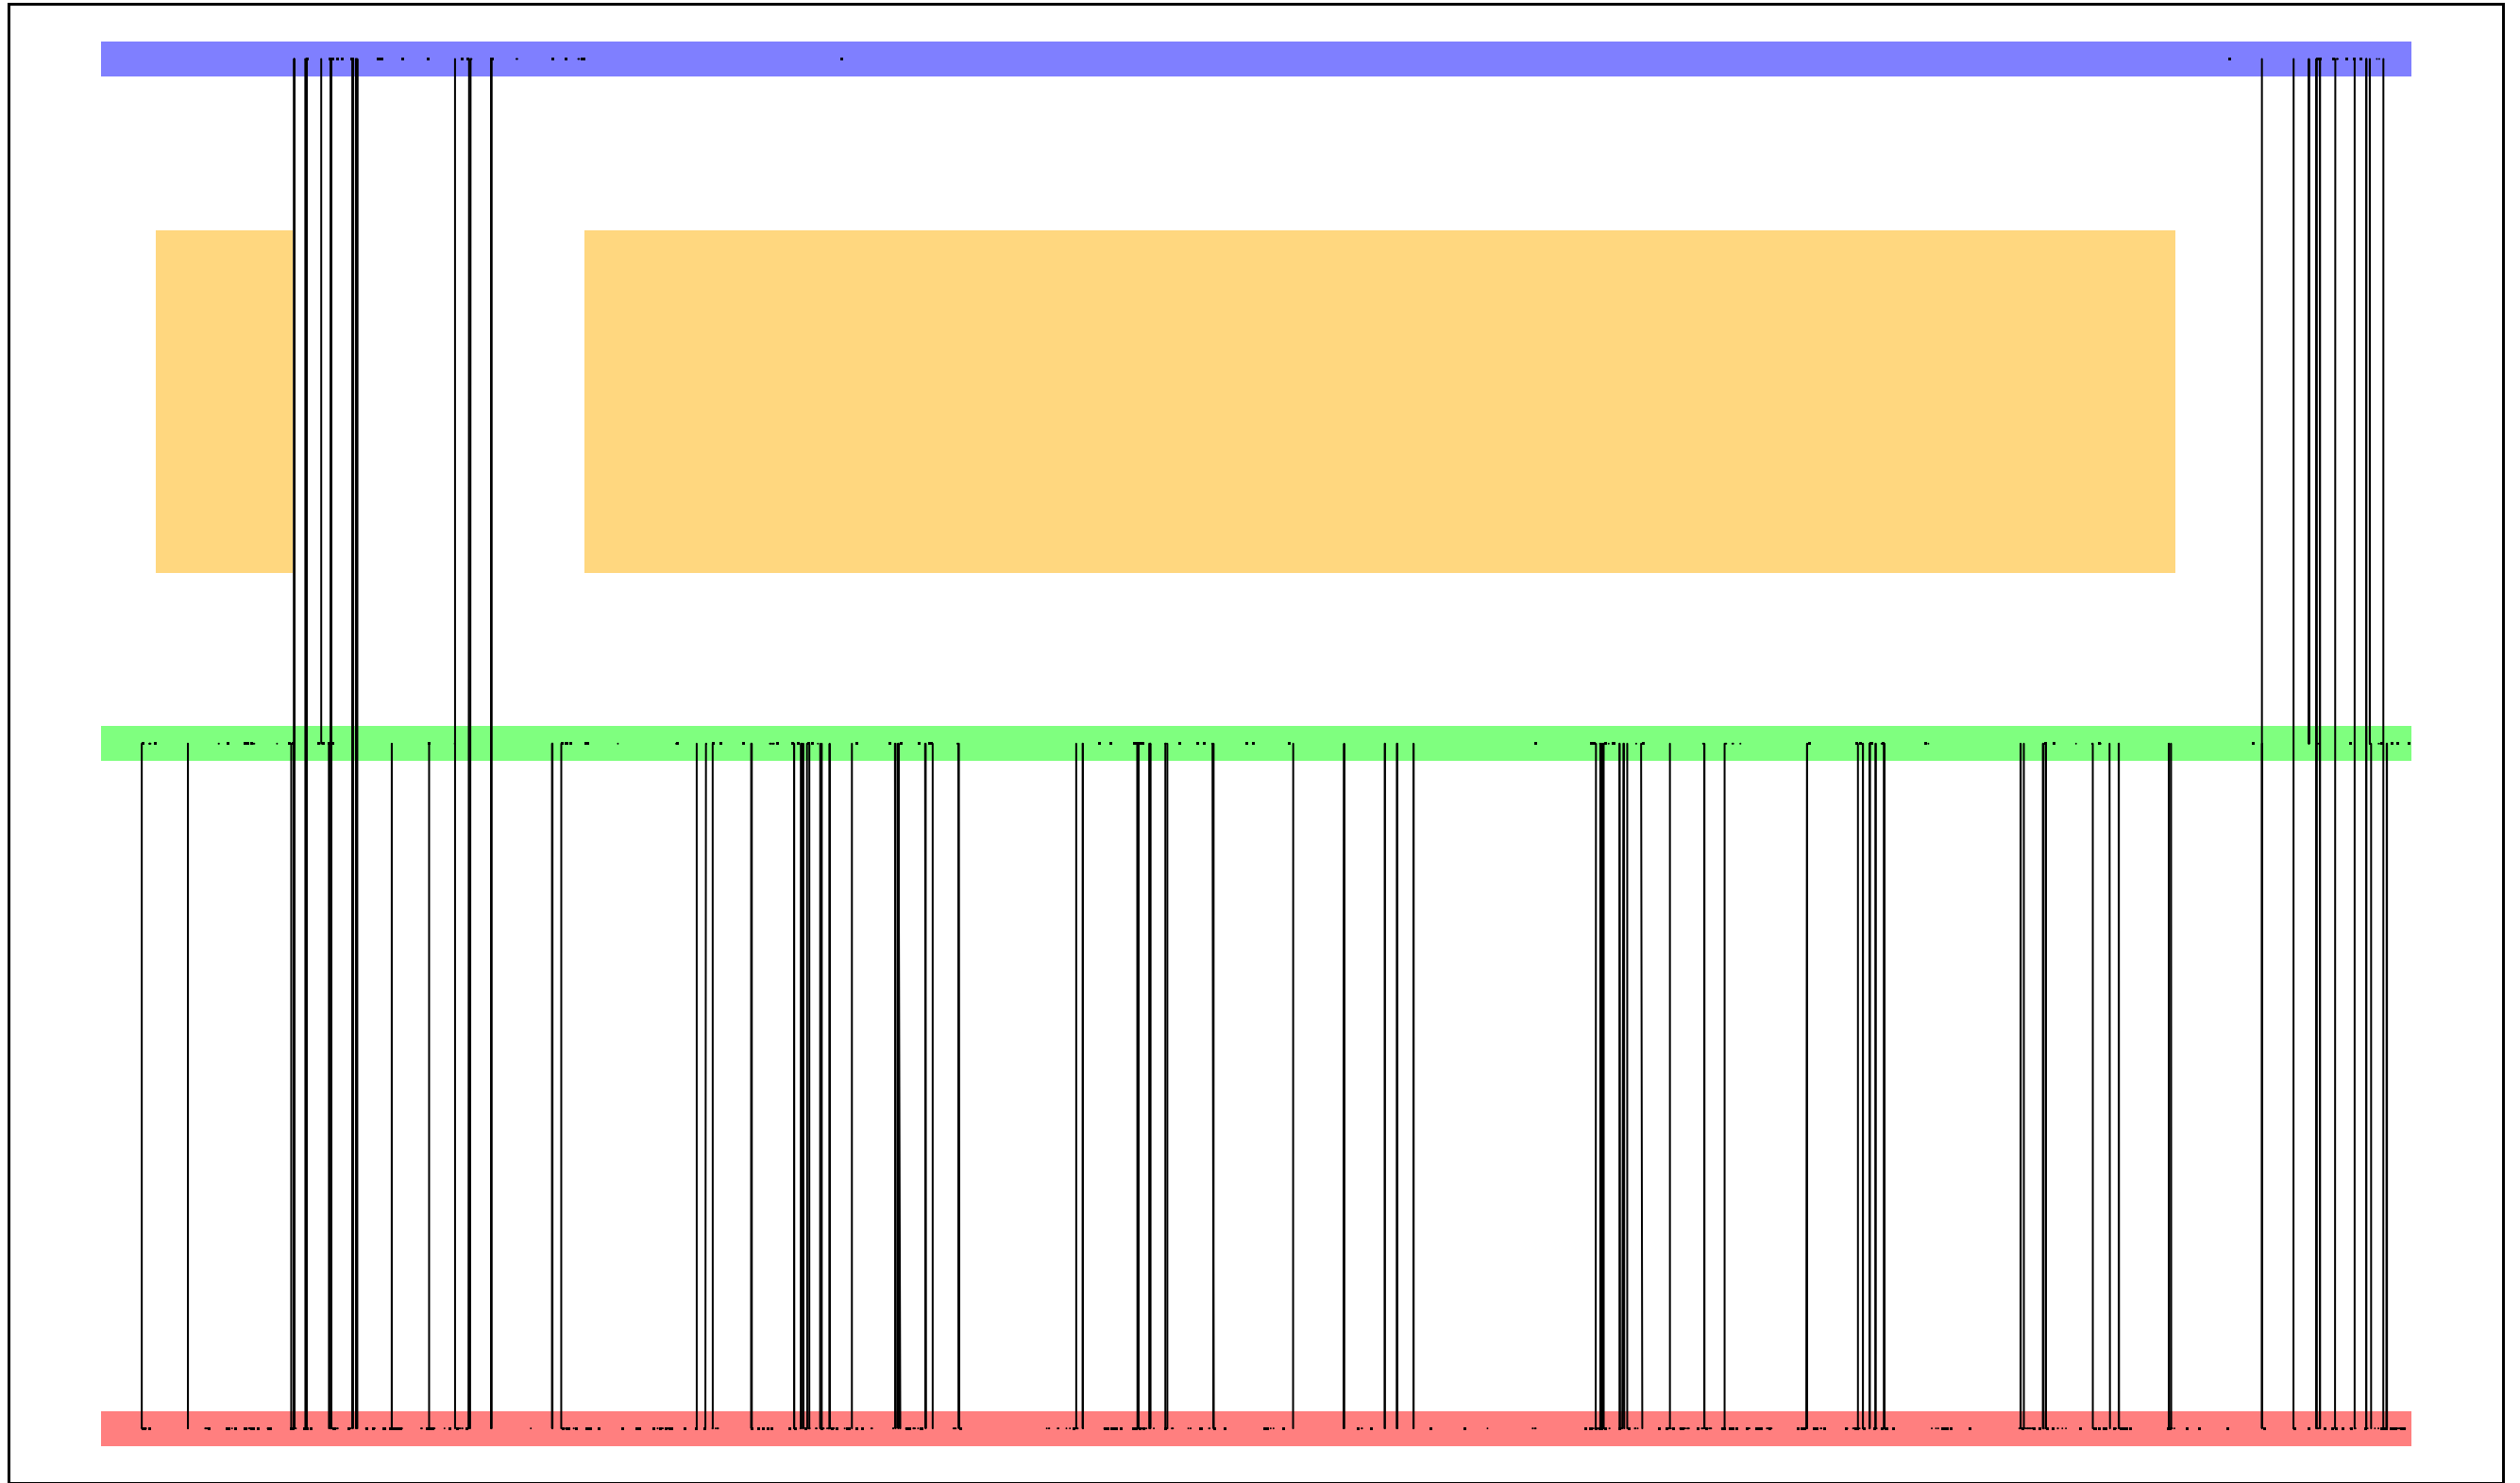

X Chromosome: Pos 1 – 154,899,846

cms0975 – cms19028

DISCORDANT

CONCORDANT ALT

CONCORDANT REF

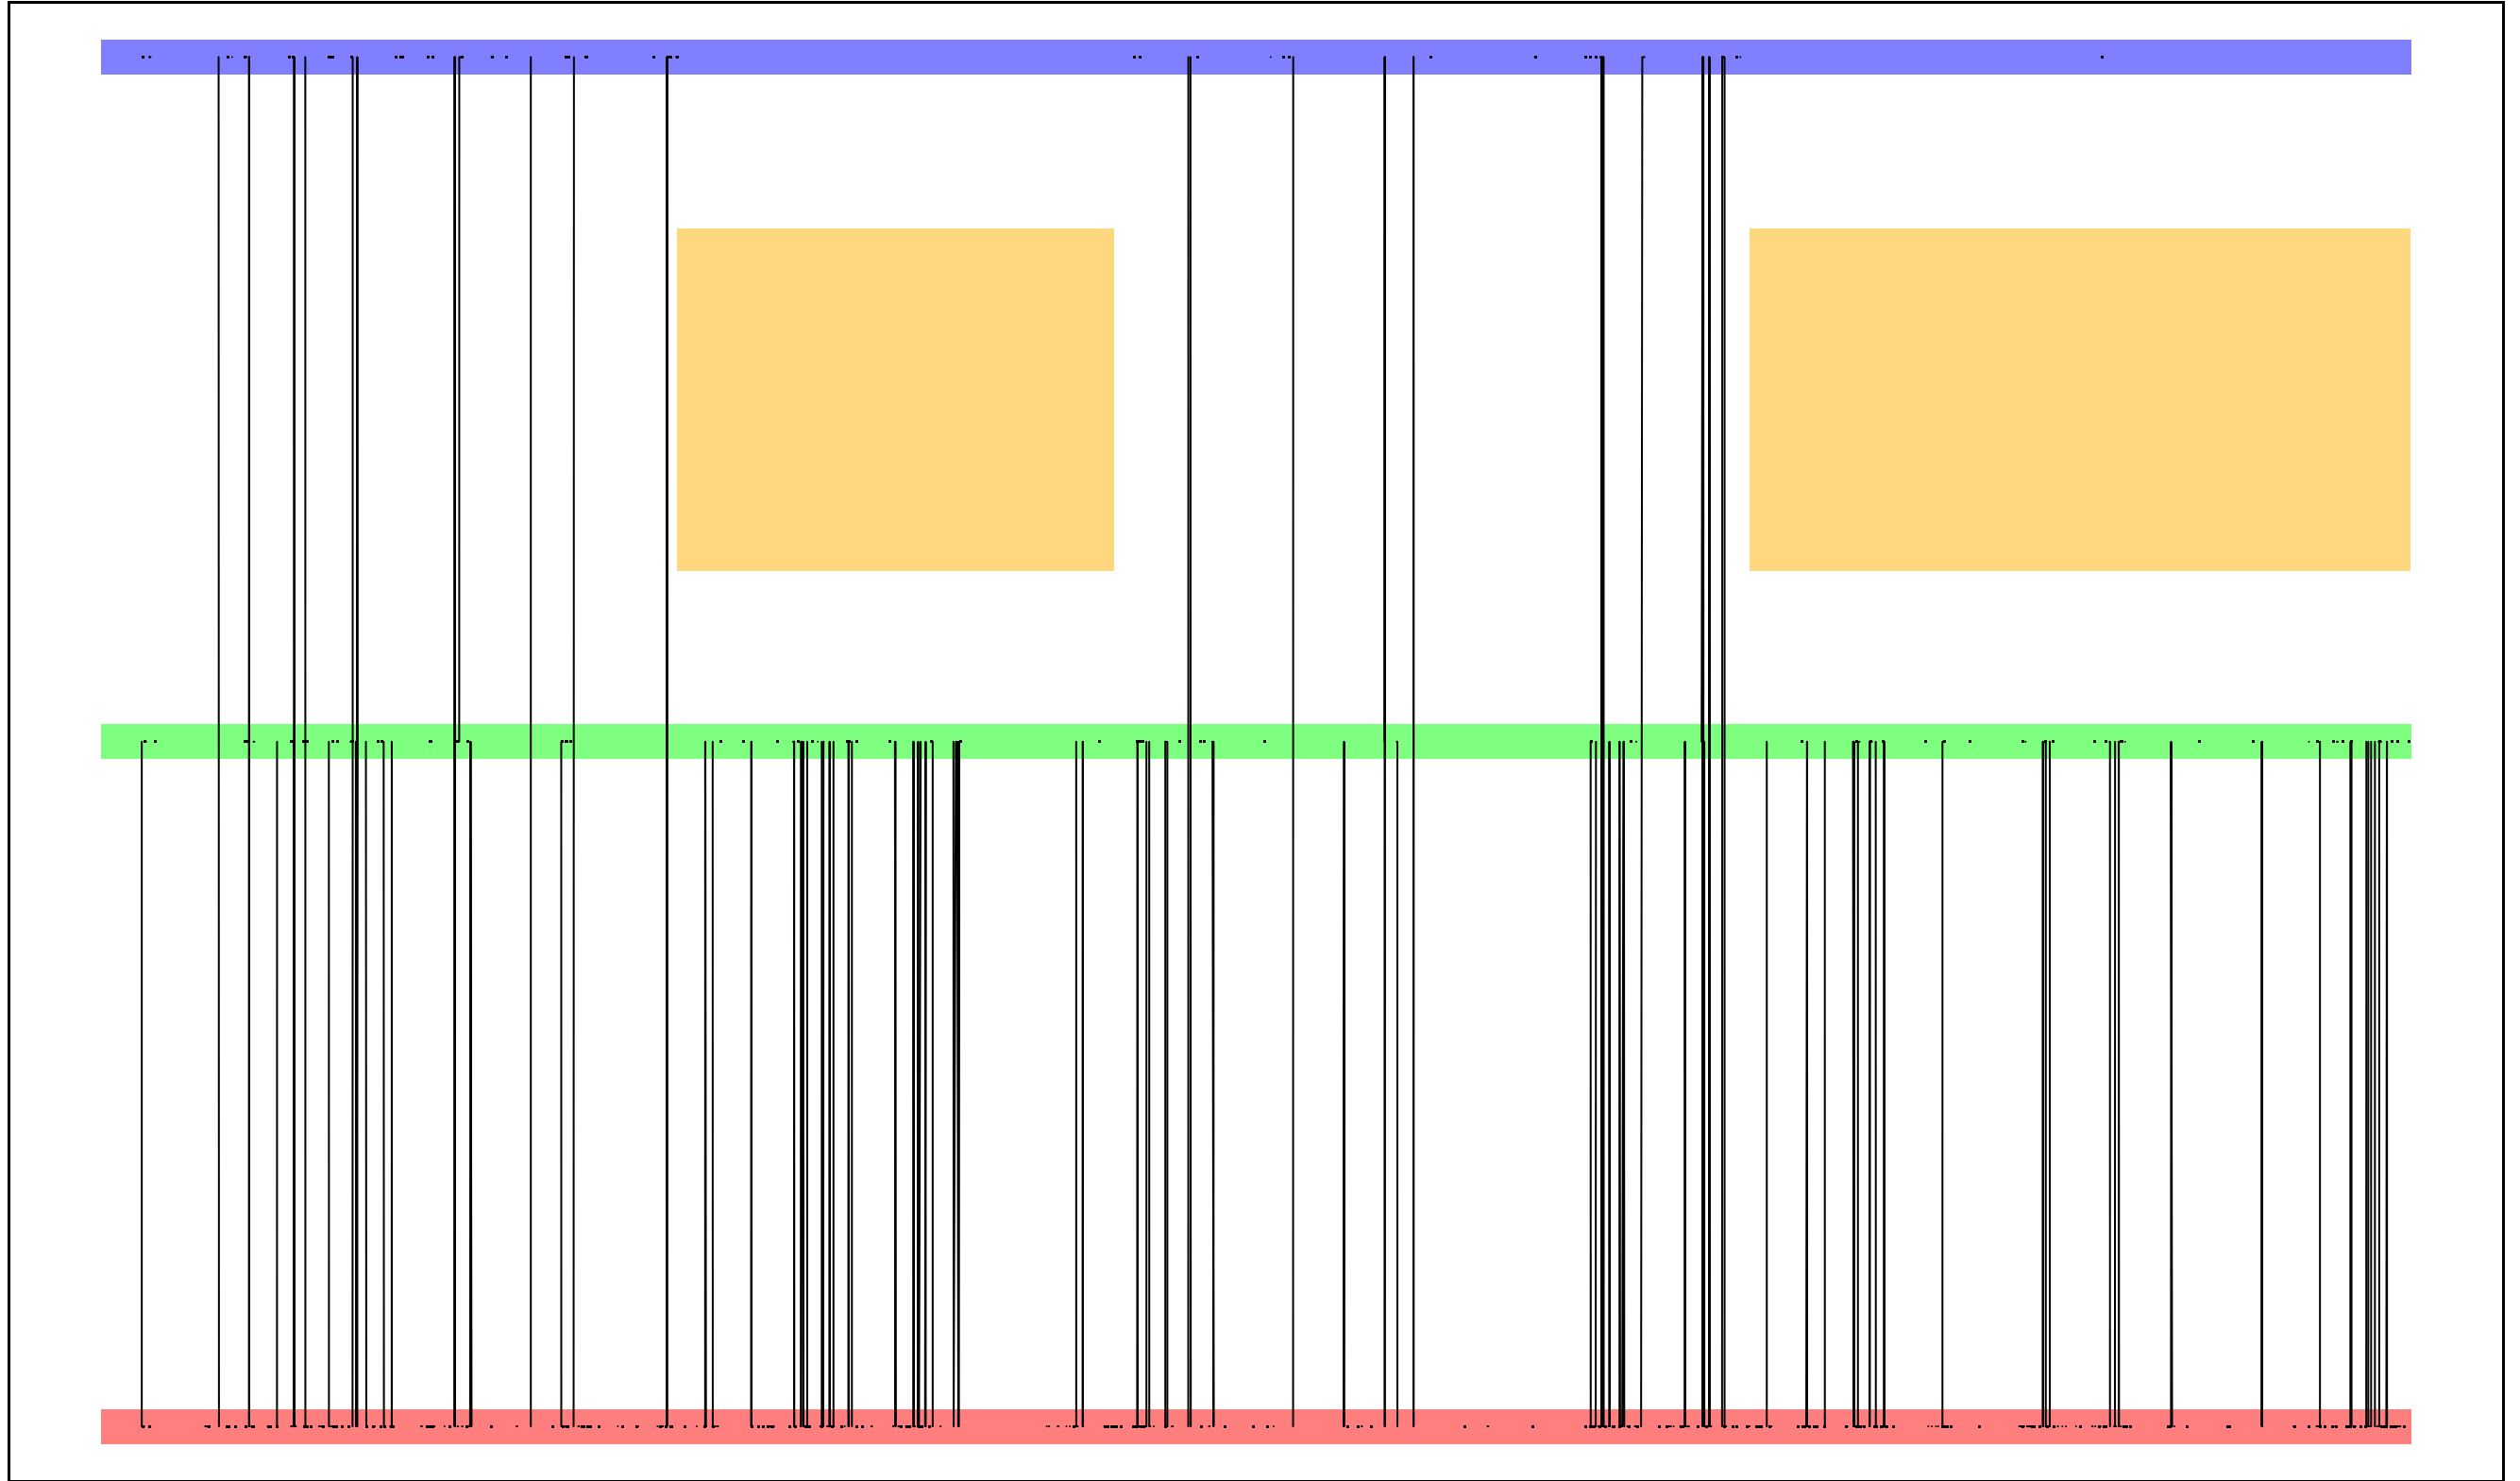

X Chromosome: Pos 1 – 154,899,846

CMS20461 – CMS20462

DISCORDANT

CONCORDANT ALT

CONCORDANT REF

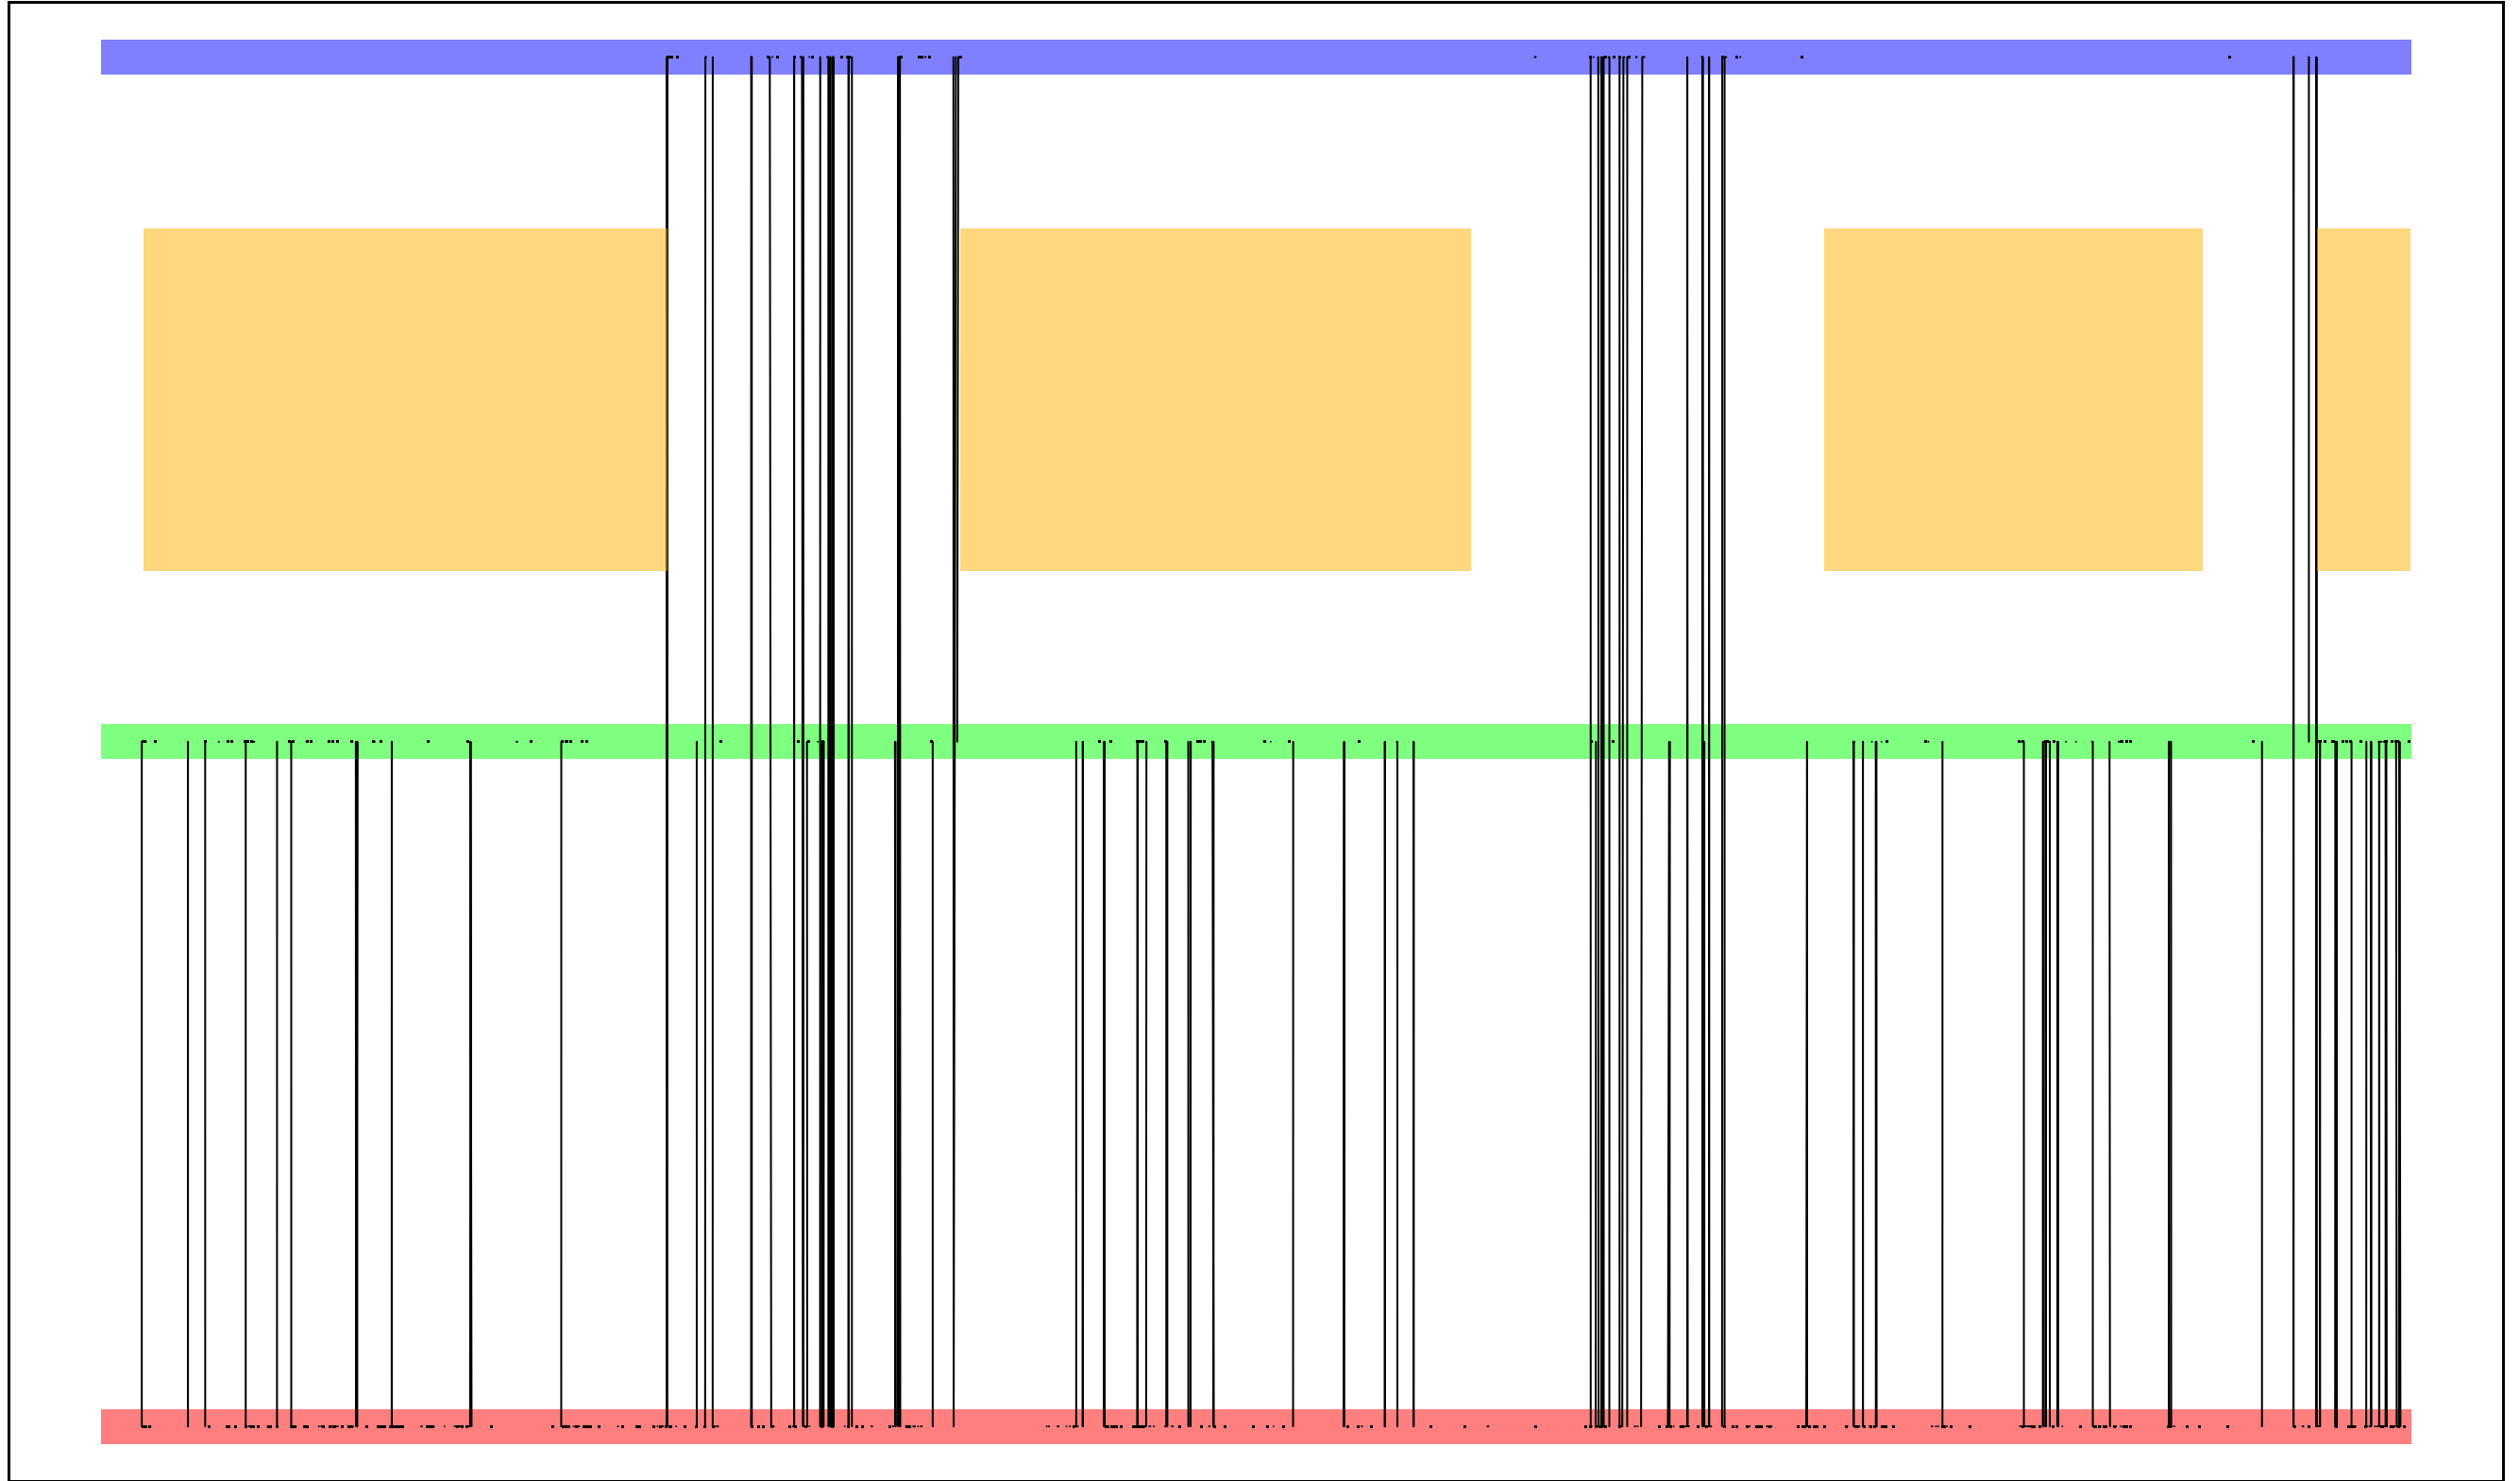

X Chromosome: Pos 1 – 154,899,846
