# Supplementary material for: Affected Kindred Analysis of Human X Chromosome Exomes to Identify Novel X-Linked Intellectual Disability Genes
Source: PubMed Central journal article supplement (PMC4332666; doi:10.1371/journal.pone.0116454), 2015-02-13

**A****Stratification of XLID Cohort, European American (EA) Comparison**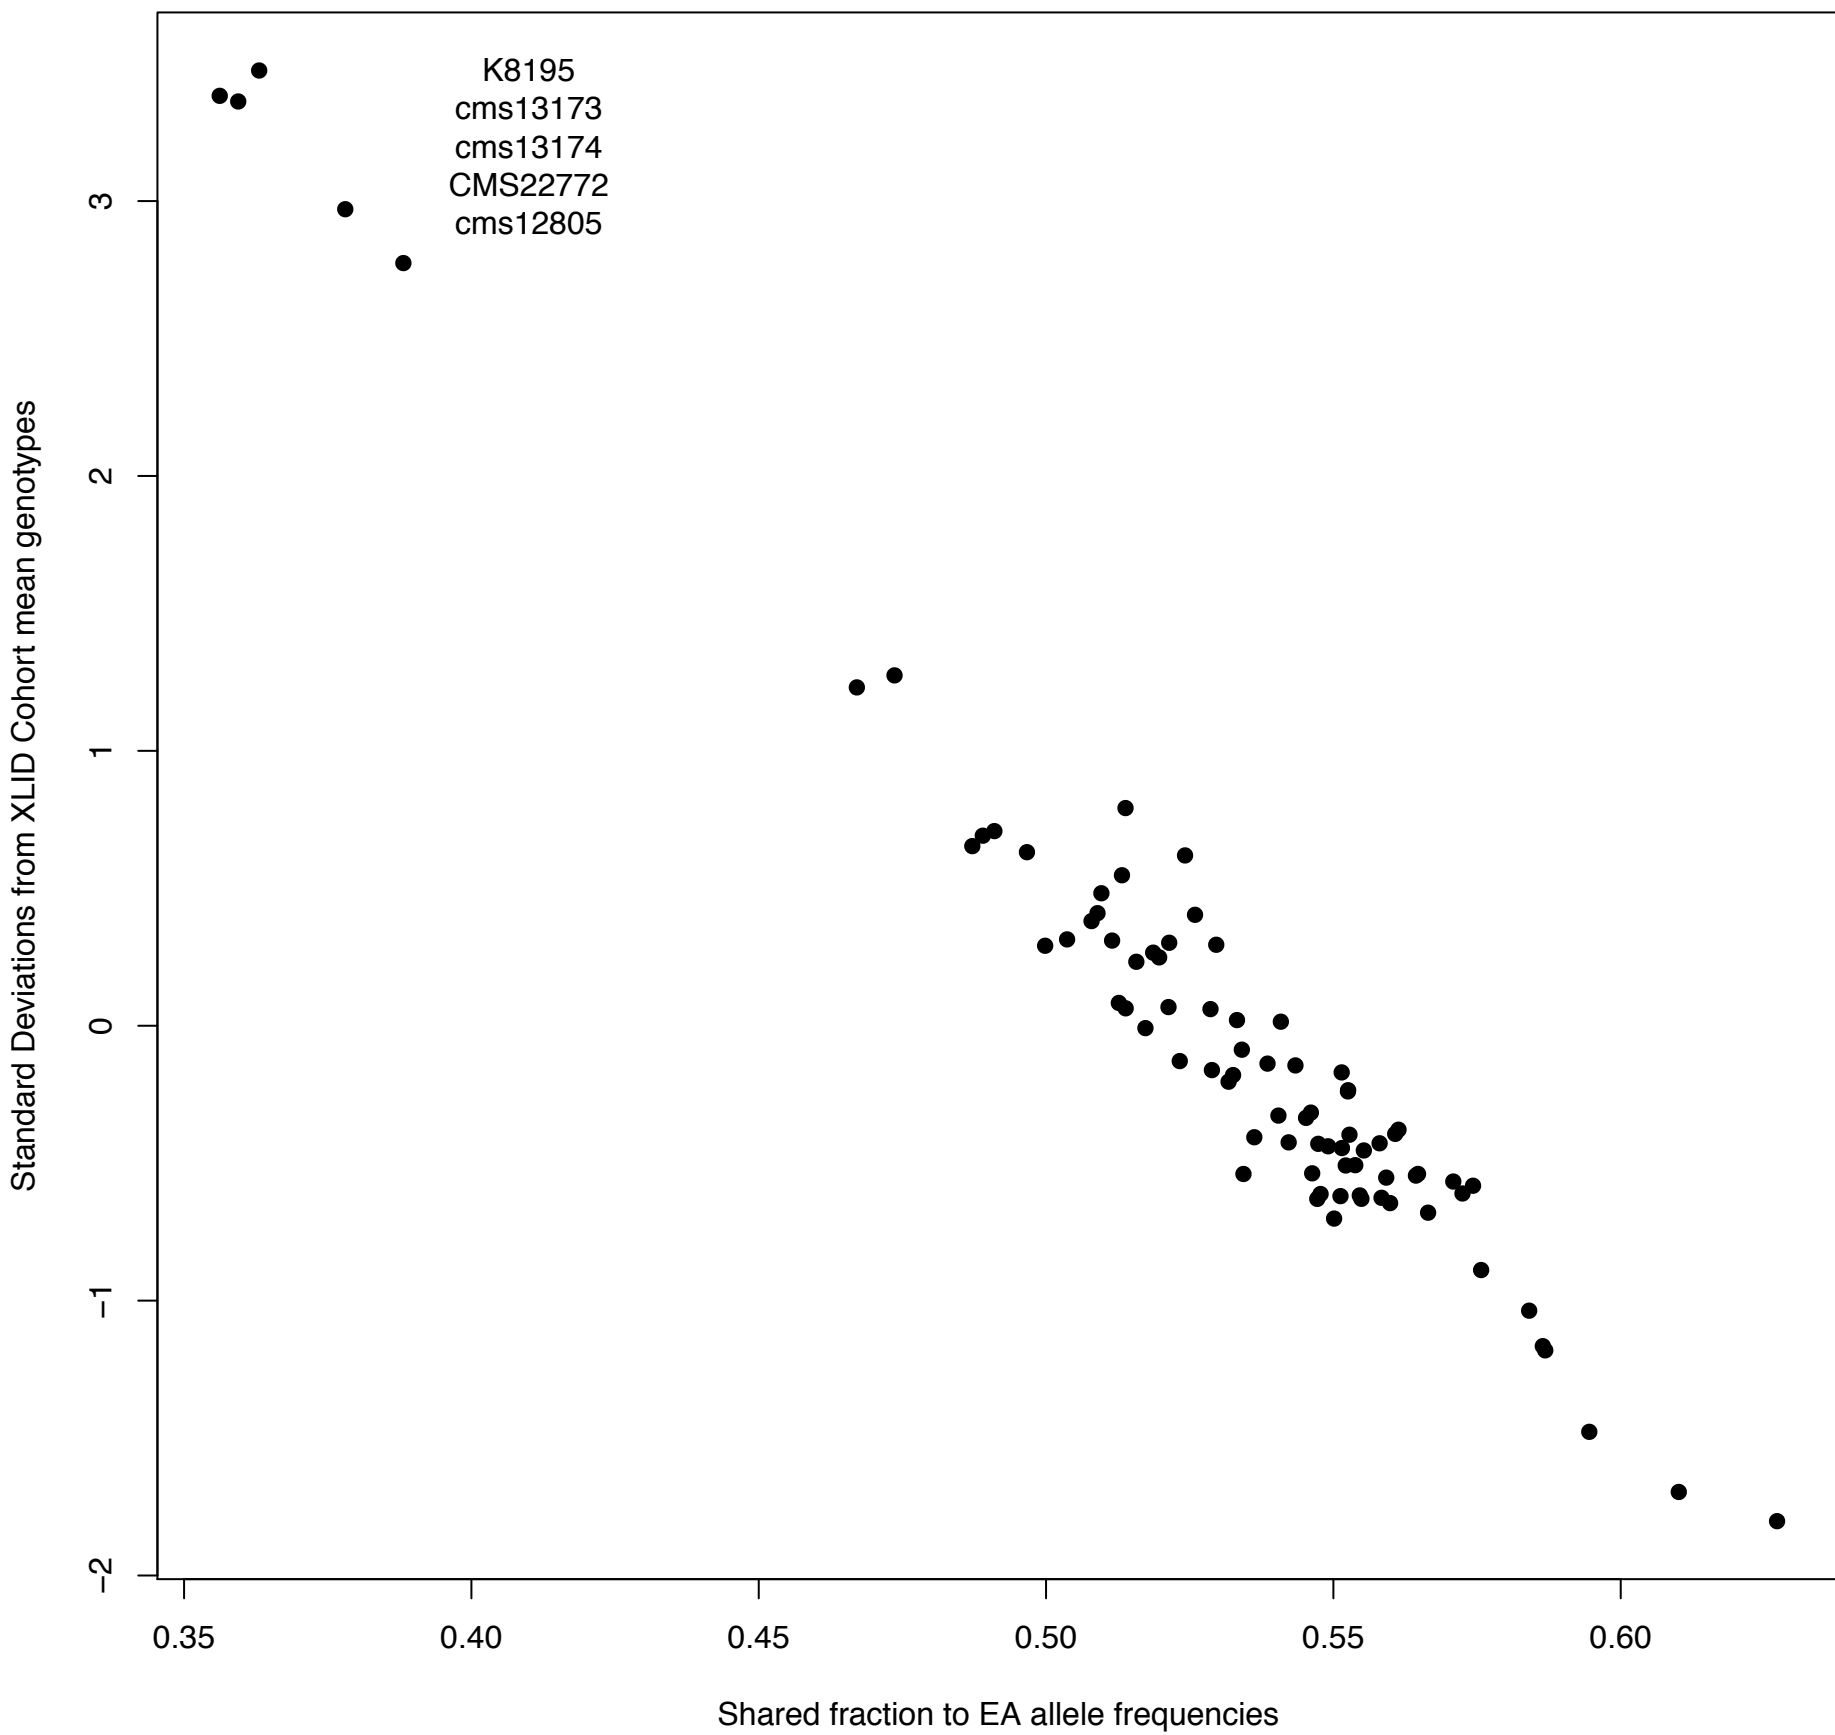

**B****Stratification of XLID Cohort, African American (AA) Comparison**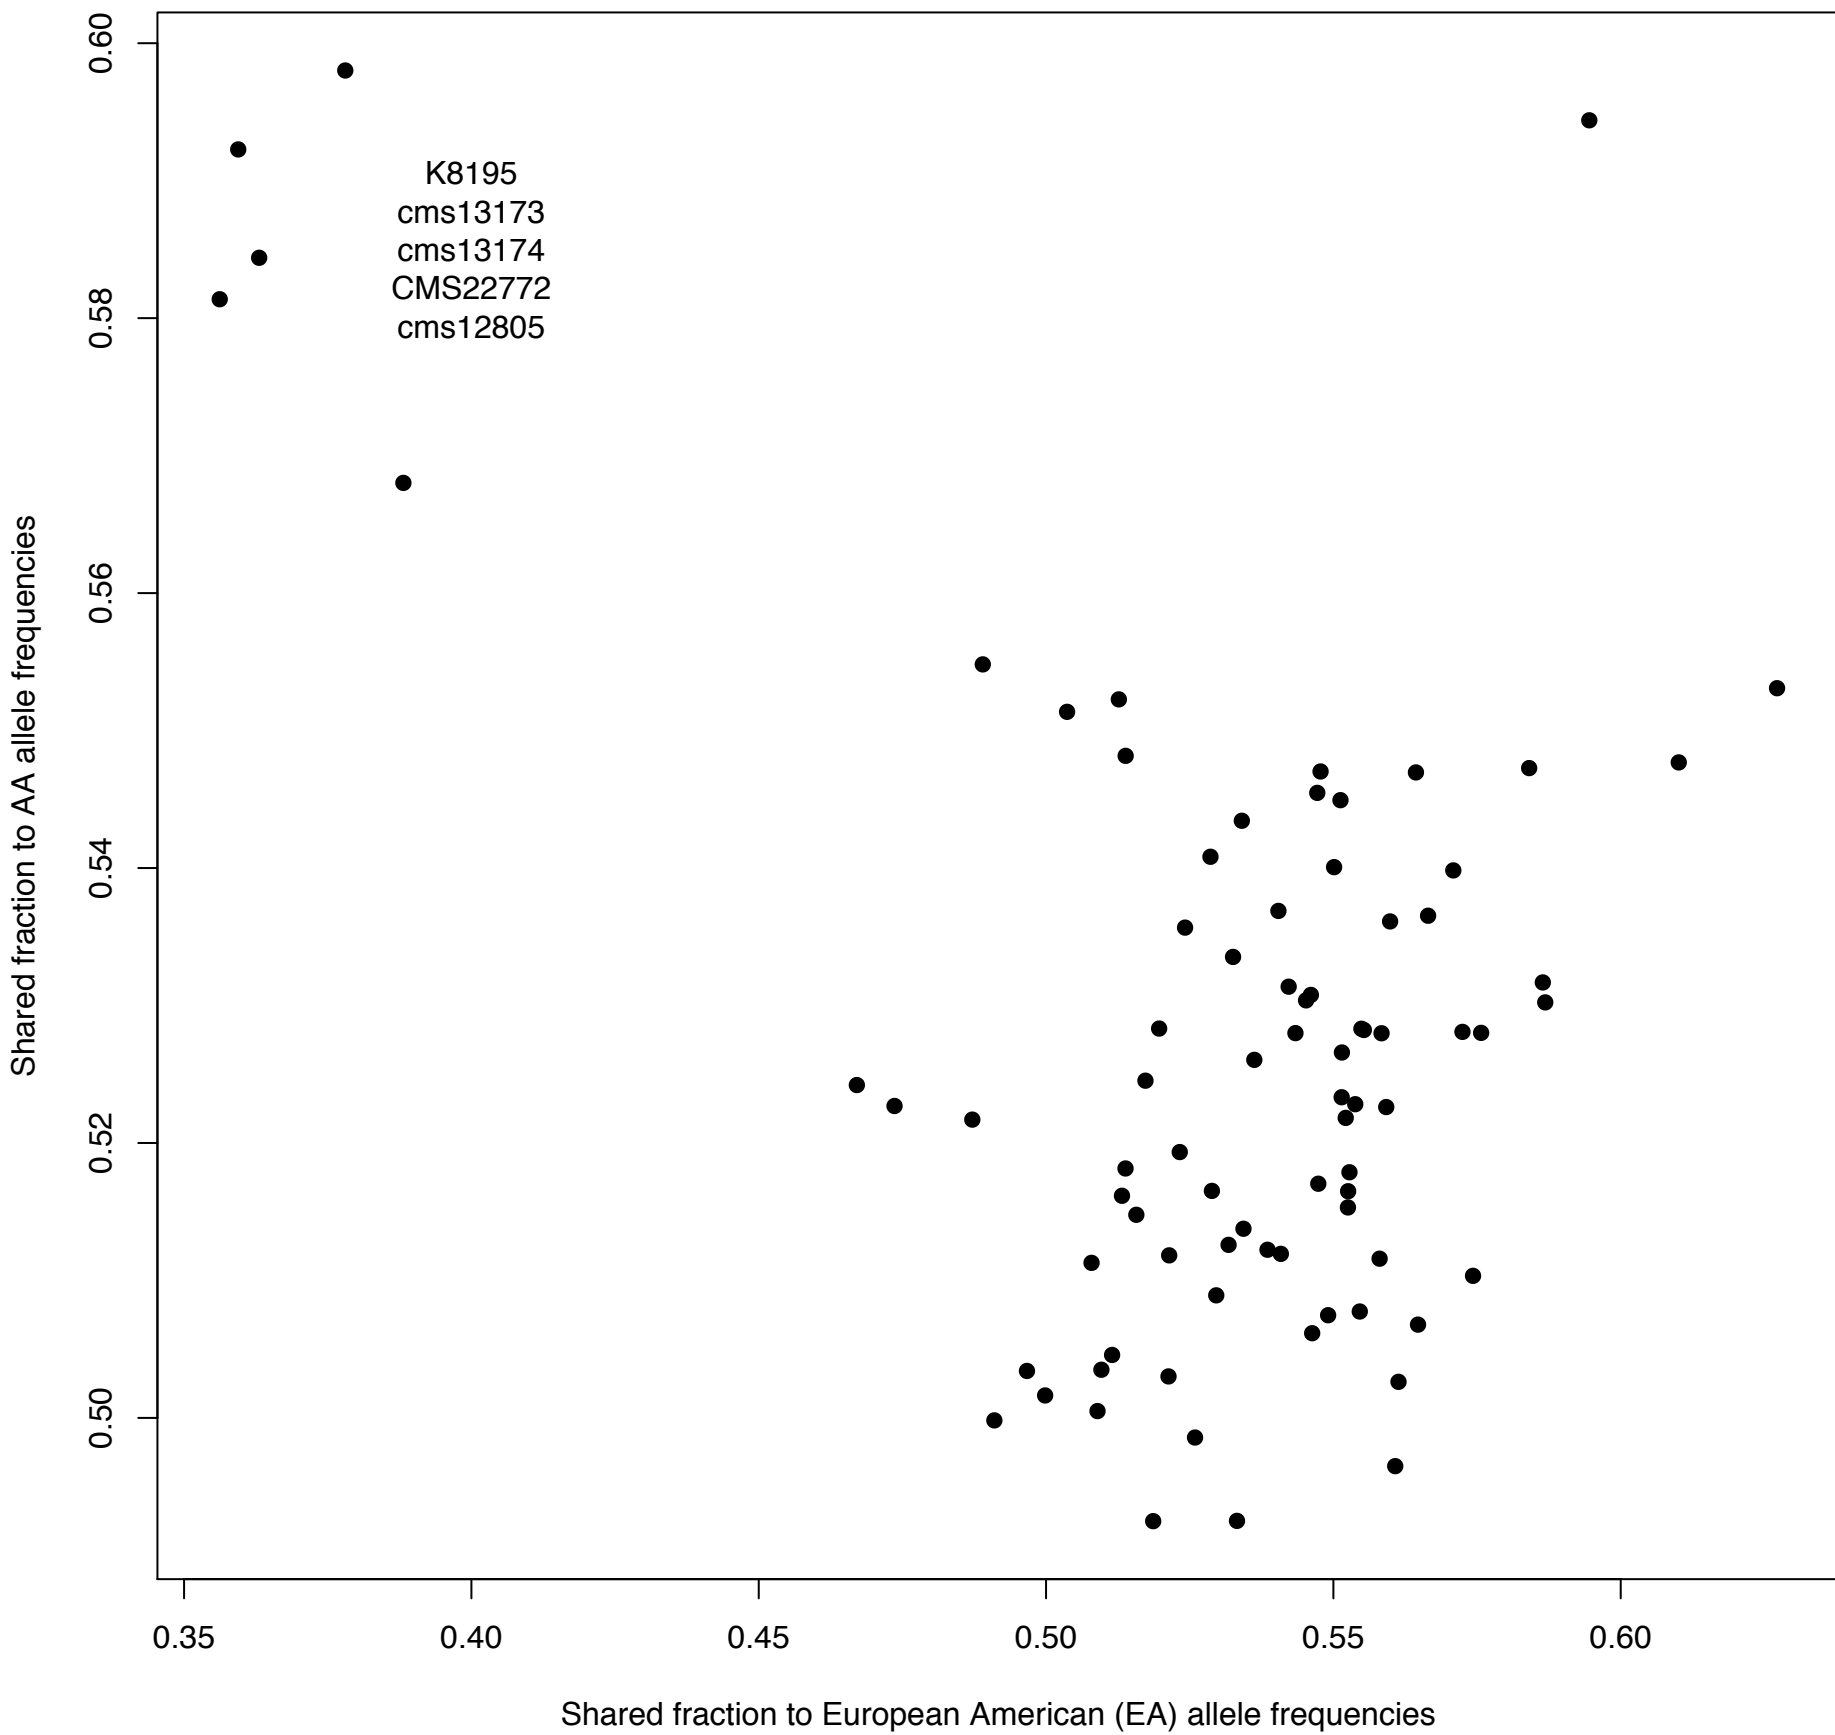

Supplement: pone.0116454.s003.pdf [file pone.0116454.s003.pdf]
