# Supplementary material for: Affected Kindred Analysis of Human X Chromosome Exomes to Identify Novel X-Linked Intellectual Disability Genes
Source: PubMed Central journal article supplement (PMC4332666; doi:10.1371/journal.pone.0116454), 2015-02-13
Supplement: pone.0116454.s004.pdf [file pone.0116454.s004.pdf]

**Table S1. Calculation of Rare Variant Minor Allele Frequency (MAF) Cutoff**

| # of ♂ X Chrs ( <i>m</i> )                     | # of ♀ X Chrs ( <i>f</i> )       | # of X Chrs Total                       |
|------------------------------------------------|----------------------------------|-----------------------------------------|
| 525                                            | 2 x 567                          | 1659                                    |
| # of mut. alleles in 1000 Genomes ( <i>n</i> ) | Prob. alleles only in ♀ carriers | Prob. (eq) alleles only in ♀ carriers   |
| 1                                              | 68.35%                           | $\prod_{i=(f-n+1)}^f \frac{2i}{2i + m}$ |
| 2                                              | 46.70%                           |                                         |
| 3                                              | 31.88%                           |                                         |
| 4                                              | 21.76%                           |                                         |
| 5                                              | 14.84%                           |                                         |
| 6                                              | 10.11%                           |                                         |
| 7                                              | 6.89%                            |                                         |
| 8                                              | 4.69%                            |                                         |
| 9                                              | 3.19%                            |                                         |
| 10                                             | 2.17%                            |                                         |
| 11                                             | 1.48%                            |                                         |
| <b>12*</b>                                     | <b>1.00%</b>                     |                                         |

\* At 12 copies of a mutant allele in the 1000 Genomes dataset, the probability of seeing all 12 alleles in only female carriers is only 1%. At >12 copies of a mutant allele, the probability is less than 1%. 12 mutant allele copies is ~ 0.73% minor allele frequency. We can safely assume that potential pathological variants with a MAF < 0.73% could exist purely in a female carrier state. Therefore, such variants should be removed from dbSNP before implementation of a dbSNP-based filter.
